# Supplementary material for: Application of nonmetallic frustrated cations in the activation of small molecules
Source: Royal Society of Chemistry journal article supplement (doi:10.1039/d3dt01433a), 2023-01-01
Supplement: d3dt01433a1.pdf [file d3dt01433a1.pdf]

## Supplementary Information

# Application of nonmetallic frustrated cations in the activation of small molecules

Kinga Kaniewska-Laskowska,<sup>a\*</sup> Marcin Czapla,<sup>b</sup> Jarosław Chojnacki,<sup>a</sup>  
and Rafał Grubba<sup>a\*</sup>

*\*corresponding author: kinga.kaniewska-laskowska@pg.edu.pl, rafal.grubba@pg.edu.pl*

<sup>a</sup>*Department of Inorganic Chemistry, Faculty of Chemistry and Advanced Materials Center, Gdańsk  
University of Technology, Narutowicza 11/12, 80-233 Gdańsk, Poland*

<sup>b</sup>*Laboratory of Quantum Chemistry, Department of Theoretical Chemistry, Faculty of Chemistry,  
University of Gdańsk, Wita Stwosza 63, 80-308 Gdańsk, Poland*

# Table of Contents

|                                                                                                                                                                                 |    |
|---------------------------------------------------------------------------------------------------------------------------------------------------------------------------------|----|
| Experimental section.....                                                                                                                                                       | 3  |
| Experimental details.....                                                                                                                                                       | 3  |
| Preparation of 3.....                                                                                                                                                           | 3  |
| Preparation of 4.....                                                                                                                                                           | 4  |
| Preparation of 5.....                                                                                                                                                           | 5  |
| Preparation of 6.....                                                                                                                                                           | 6  |
| NMR spectra of isolated compounds.....                                                                                                                                          | 7  |
| NMR spectra of 3.....                                                                                                                                                           | 8  |
| NMR spectra of 4.....                                                                                                                                                           | 13 |
| NMR spectra of 5.....                                                                                                                                                           | 18 |
| NMR spectra of 6.....                                                                                                                                                           | 23 |
| Reaction of 1 with Li[Al(OC(CF <sub>3</sub> ) <sub>3</sub> ) <sub>4</sub> ] – monitoring of reaction progress by <sup>11</sup> B and <sup>31</sup> P{ <sup>1</sup> H} NMR ..... | 28 |
| X-ray structure analysis.....                                                                                                                                                   | 29 |
| X-ray structure analysis details.....                                                                                                                                           | 29 |
| DFT calculations.....                                                                                                                                                           | 34 |
| General methods.....                                                                                                                                                            | 34 |
| Structures.....                                                                                                                                                                 | 34 |
| Cartesian coordinates.....                                                                                                                                                      | 38 |
| References.....                                                                                                                                                                 | 44 |

# Experimental section

## Experimental details

All manipulations were performed under a dry argon atmosphere employing flame-dried Schlenk-type glassware on a vacuum line or in a glovebox. Solvents, dichloromethane and dichloromethane- $d_2$  were dried over  $P_2O_5$  and distilled under argon. Pentane was dried with sodium-potassium alloy and distilled under argon. 1D ( $^1H$ ,  $^{11}B$ ,  $^{31}P\{^1H\}$ ,  $^{31}P$ ,  $^{13}C$ ,  $^{27}Al$ ,  $^{19}F\{^1H\}$ ,  $^{19}F$ ) and 2D NMR spectra were recorded on a Bruker AV400 MHz spectrometer (external standard TMS for  $^1H$  and  $^{13}C$ ;  $BF_3 \cdot Et_2O$  for  $^{11}B$ , 85%  $H_3PO_4$  for  $^{31}P$ ;  $[Al(H_2O)_6]^{3+}$  for  $^{27}Al$ ,  $CFCl_3$  for  $^{19}F$ ) at ambient temperature. Reaction progress was monitored by  $^{11}B$ ,  $^{31}P\{^1H\}$  and  $^{31}P$  NMR spectra of reaction mixtures. Data were processed using Bruker's Topspin 3.5 software. Elemental analyses of all compounds were performed using Thermo Scientific Flash 2000 organic elemental analyzer. The principle of quantitative CHNS analysis is based on complete combustion of sample within high-temperature reactor, followed by an accurate and precise determination of produced elemental gases by TCD detector (thermal conductivity detector).  $(iPr_2N)B(Br)PtBu_2^1$  and  $Li[Al(OC(CF_3)_3)_4]^2$  were prepared according to literature procedures.

## Preparation of 3

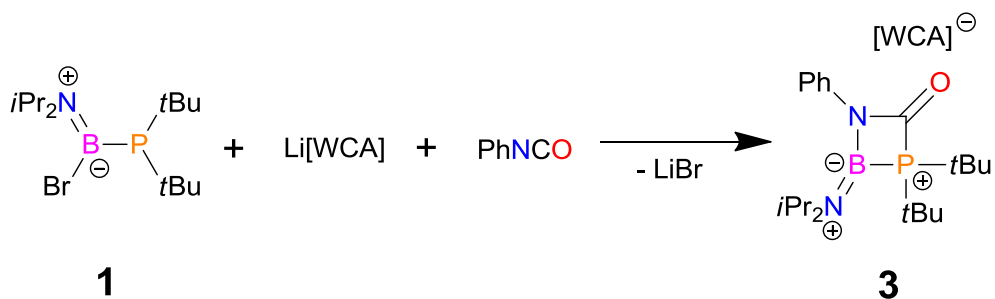

**Scheme S1.** Synthesis of **3**

A solution of phenyl isocyanate in  $CH_2Cl_2$  (0.25 M, 1 mL) was added dropwise to a stirred suspension of **1** (0.084 g, 0.250 mmol) and  $Li[Al(OC(CF_3)_3)_4]$  (0.244 g, 0.250 mmol) in  $CH_2Cl_2$  (4 mL) at  $-70^\circ C$ . The mixture was allowed to warm to room temperature and stirred overnight. Filtration to separate the white precipitate of LiBr, followed by the evaporation of the solvent under reduced pressure, afforded a light yellow oily residue. Slow cooling of the resulting oil layered with 2 mL of pentane to  $+4^\circ C$  gave suitable light yellow crystals for X-ray diffraction. Yield: 56.0% (0.200 g, 0.140 mmol). **Elemental analysis** calc. for  $C_{37}H_{37}AlBF_{36}N_2O_5P$  (1342.41 g/mol): C, 33.10; H, 2.78; N, 2.09. Found: C, 33.50; H, 2.61; N 2.00.

## NMR data of 3

$^{11}\text{B}$  NMR ( $\text{CD}_2\text{Cl}_2$ ):  $\delta$  28.7 (bd,  $^1J_{\text{BP}} = 119.3$  Hz).

$^{31}\text{P}\{^1\text{H}\}$  NMR ( $\text{CD}_2\text{Cl}_2$ ):  $\delta$  66.8 (bm).

$^1\text{H}$  NMR ( $\text{CD}_2\text{Cl}_2$ ):  $\delta$  7.49 (1 H, m, *p*-CH of Ph); 7.47 (2 H, m, *o*-CH of Ph); 7.07 (2 H, m, *o*-CH of Ph); 3.50 (1 H, sept,  $^3J_{\text{HH}} = 6.7$  Hz, CH(CH<sub>3</sub>)<sub>2</sub>); 3.39 (1 H, dsept,  $^3J_{\text{HH}} = 7.0$  Hz,  $^4J_{\text{PH}} = 1.5$  Hz, CH(CH<sub>3</sub>)<sub>2</sub>); 1.62 (18 H, d,  $^3J_{\text{PH}} = 17.5$  Hz, C(CH<sub>3</sub>)<sub>3</sub>); 1.34 (6 H, d,  $^3J_{\text{HH}} = 6.7$  Hz, CH(CH<sub>3</sub>)<sub>2</sub>); 0.92 (6 H, d,  $^3J_{\text{HH}} = 7.0$  Hz, CH(CH<sub>3</sub>)<sub>2</sub>).

$^{13}\text{C}\{^1\text{H}\}$  NMR ( $\text{CD}_2\text{Cl}_2$ ):  $\delta$  165.0 (d,  $^1J_{\text{CP}} = 66.2$  Hz, NCO); 135.6 (d,  $^3J_{\text{CP}} = 20.1$  Hz, *ipso*-C of Ph); 130.4 (s, *p*-CH of PPh); 130.2 (s, *o*-CH of PPh); 126.9 (s, *m*-CH of PPh); 121.2 (q,  $^1J_{\text{CF}} = 292.6$  Hz, OC(CF<sub>3</sub>)<sub>3</sub>); 59.9 (d,  $^3J_{\text{CP}} = 6.3$  Hz, CH(CH<sub>3</sub>)<sub>2</sub>); 47.2 (d,  $^3J_{\text{CP}} = 6.3$  Hz, CH(CH<sub>3</sub>)<sub>2</sub>); 37.3 (d,  $^1J_{\text{CP}} = 11.9$  Hz, C(CH<sub>3</sub>)<sub>3</sub>); 28.4 (d,  $^2J_{\text{CP}} = 1.9$  Hz, C(CH<sub>3</sub>)<sub>3</sub>); 23.6 (s, CH(CH<sub>3</sub>)<sub>2</sub>); 22.5 (s, CH(CH<sub>3</sub>)<sub>2</sub>).

$^{27}\text{Al}$  NMR ( $\text{CD}_2\text{Cl}_2$ ):  $\delta$  34.2 (s, [Al(OC(CF<sub>3</sub>)<sub>3</sub>)<sub>4</sub>]<sup>-</sup>).

$^{19}\text{F}\{^1\text{H}\}$  ( $\text{CD}_2\text{Cl}_2$ ):  $\delta$  -75.7 (s, OC(CF<sub>3</sub>)<sub>3</sub>).

## Preparation of 4

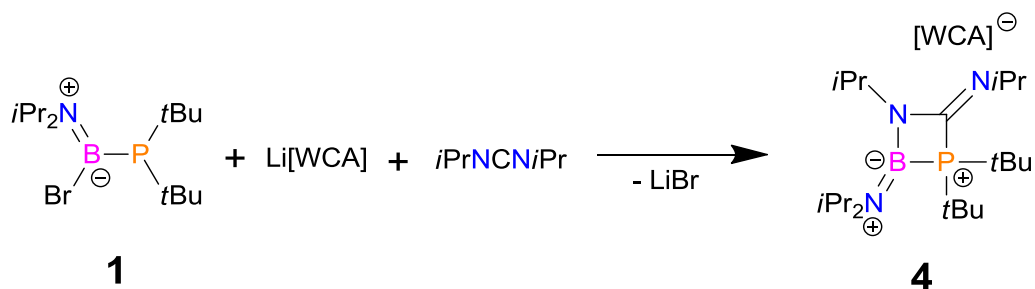

Scheme S2. Synthesis of 4

A solution of *N,N'*-diisopropylcarbodiimide in  $\text{CH}_2\text{Cl}_2$  (0.25 M, 1 mL) was added dropwise to a stirred suspension of **1** (0.084 g, 0.250 mmol) and  $\text{Li}[\text{Al}(\text{OC}(\text{CF}_3)_3)_4]$  (0.244 g, 0.250 mmol) in  $\text{CH}_2\text{Cl}_2$  (4 mL) at  $-70$  °C. The mixture was allowed to warm to room temperature and stirred overnight. After filtration of the precipitated  $\text{LiBr}$ , the resulting solution was concentrated to the half of volume and left at  $-20$  °C to afford colourless crystals. Yield: 61% (0.207 g, 0.153 mmol). **Elemental analysis** calc. for  $\text{C}_{37}\text{H}_{46}\text{AlBF}_{36}\text{N}_3\text{O}_4\text{P}$  (1349.49 g/mol): C, 32.93; H, 3.44; N, 3.11. Found: C, 33.20; H, 3.23; N, 3.01.

## NMR data of 4

$^{11}\text{B}$  NMR ( $\text{CD}_2\text{Cl}_2$ ):  $\delta$  27.4 (bd,  $^1J_{\text{BP}} = 106.4$  Hz).

$^{31}\text{P}\{^1\text{H}\}$  NMR ( $\text{CD}_2\text{Cl}_2$ ):  $\delta$  69.2 (bm).

$^1\text{H}$  NMR ( $\text{CD}_2\text{Cl}_2$ ):  $\delta$  4.05 (1 H, dsept,  $^3J_{\text{HH}} = 6.7$  Hz,  $^4J_{\text{PH}} = 1.4$  Hz,  $\text{N}(\text{P})\text{CNCH}(\text{CH}_3)_2$ ); 3.46 (2 H, m,  $\text{CH}(\text{CH}_3)_2$ ); 3.16 (1 H, dsept,  $^3J_{\text{HH}} = 6.0$  Hz,  $^4J_{\text{PH}} = 2.8$  Hz,  $\text{N}(\text{B})\text{CNCH}(\text{CH}_3)_2$ ); 1.47 (18 H, d,  $^3J_{\text{PH}} = 17.0$  Hz,  $\text{C}(\text{CH}_3)_3$ , overlapped with  $\text{N}(\text{P})\text{CNCH}(\text{CH}_3)_2$ ); 1.44 (dd, 6 H,  $^3J_{\text{HH}} = 6.7$  Hz,  $^5J_{\text{PH}} = 1.2$  Hz,  $\text{N}(\text{P})\text{CNCH}(\text{CH}_3)_2$ , overlapped with  $\text{C}(\text{CH}_3)_3$ ); 1.26 (12 H, d,  $^3J_{\text{HH}} = 6.9$  Hz,  $\text{CH}(\text{CH}_3)_2$ ); 1.20 (6 H, d,  $^3J_{\text{HH}} = 6.0$  Hz,  $\text{N}(\text{B})\text{CNCH}(\text{CH}_3)_2$ ).

$^{13}\text{C}\{^1\text{H}\}$  NMR ( $\text{CD}_2\text{Cl}_2$ ):  $\delta$  137.8 (d,  $^1J_{\text{CP}} = 21.4$  Hz,  $\text{NCN}$ ); 121.2 (q,  $^1J_{\text{CF}} = 293.1$  Hz,  $\text{OC}(\text{CF}_3)_3$ ); 57.6 (d,  $^3J_{\text{CP}} = 10.9$  Hz,  $\text{N}(\text{B})\text{CNCH}(\text{CH}_3)_2$ ); 53.3 (d,  $^3J_{\text{CP}} = 16.9$  Hz,  $\text{N}(\text{P})\text{CNCH}(\text{CH}_3)_2$ ); 36.1 (d,  $^1J_{\text{CP}} = 10.9$  Hz,  $\text{C}(\text{CH}_3)_3$ ); 29.1 (d,  $^2J_{\text{CP}} = 2.7$  Hz,  $\text{C}(\text{CH}_3)_3$ ); 24.1 (s,  $\text{N}(\text{B})\text{CNCH}(\text{CH}_3)_2$ ); 22.6 (very bs,  $\text{CH}(\text{CH}_3)_2$ ); 18.6 (s,  $\text{N}(\text{P})\text{CNCH}(\text{CH}_3)_2$ ). The  $\text{CH}(\text{CH}_3)_2$  atoms were not detected at the  $^{13}\text{C}\{^1\text{H}\}$  spectrum.

$^{27}\text{Al}$  NMR ( $\text{CD}_2\text{Cl}_2$ ):  $\delta$  34.2 (s, [ $\text{Al}(\text{OC}(\text{CF}_3)_3)_4$ ]).

$^{19}\text{F}\{^1\text{H}\}$  ( $\text{CD}_2\text{Cl}_2$ ):  $\delta$  -75.7 (s,  $\text{OC}(\text{CF}_3)_3$ ).

## Preparation of 5

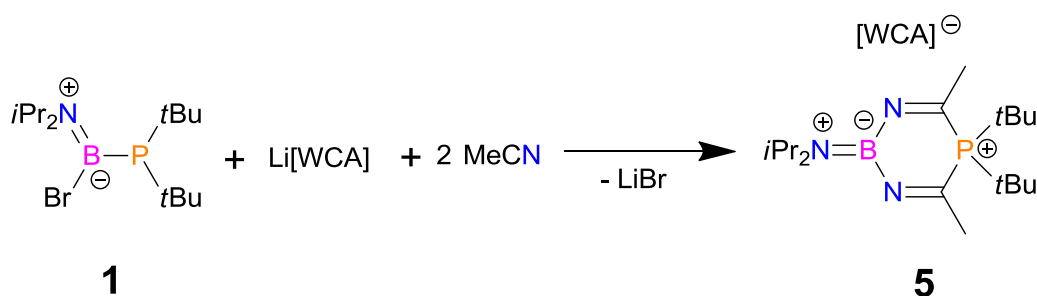

Scheme S3. Synthesis of 5

A solution of acetonitrile in  $\text{CH}_2\text{Cl}_2$  (0.25 M, 2 mL) was added dropwise to a stirred suspension of **1** (0.084 g, 0.250 mmol) and  $\text{Li}[\text{Al}(\text{OC}(\text{CF}_3)_3)_4]$  (0.244 g, 0.250 mmol) in  $\text{CH}_2\text{Cl}_2$  (4 mL) at  $-70$  °C. The mixture was allowed to warm to room temperature and stirred overnight. After filtration of the precipitated LiBr, the resulting solution was concentrated to the half of volume and layered with 2 mL of pentane. Storage at  $+4$  °C gave suitable yellow crystals for X-ray diffraction. Cooling to  $-20$  °C of the mother liquor gave an additional crop. Yield: 50% (0.165 g, 0.126 mmol). **Elemental analysis** calc. for  $\text{C}_{34}\text{H}_{38}\text{AlBF}_6\text{N}_3\text{O}_4\text{P}$  (1305.39 g/mol): C, 31.28; H, 2.93; N, 3.22. Found: C, 31.04; H, 2.84; N, 2.95.

## NMR data of 5

$^{11}\text{B}$  NMR ( $\text{CD}_2\text{Cl}_2$ ):  $\delta$  22.6 (s).

$^{31}\text{P}\{^1\text{H}\}$  NMR ( $\text{CD}_2\text{Cl}_2$ ):  $\delta$  -32.7 (s).

$^1\text{H}$  NMR ( $\text{CD}_2\text{Cl}_2$ ):  $\delta$  4.18 (2 H, bs,  $\text{CH}(\text{CH}_3)_2$ ); 2.67 (6 H, d,  $^3J_{\text{PH}} = 6.2$  Hz,  $\text{NCCH}_3$ ); 1.50 (18 H, d,  $^3J_{\text{PH}} = 16.1$  Hz,  $\text{C}(\text{CH}_3)_3$ ); 1.24 (12 H, d,  $^3J_{\text{HH}} = 6.8$  Hz,  $\text{CH}(\text{CH}_3)_2$ ).

$^{13}\text{C}\{^1\text{H}\}$  NMR ( $\text{CD}_2\text{Cl}_2$ ):  $\delta$  161.9 (s,  $\text{NCCH}_3$ ); 121.2 (q,  $^1J_{\text{CF}} = 292.3$  Hz,  $\text{OC}(\text{CF}_3)_3$ ); 47.3 (s,  $\text{CH}(\text{CH}_3)_2$ ); 38.3 (d,  $^1J_{\text{CP}} = 14.5$  Hz,  $\text{C}(\text{CH}_3)_3$ ); 35.3 (d,  $^2J_{\text{CP}} = 32.7$  Hz,  $\text{NCCH}_3$ ); 29.0 (s,  $\text{C}(\text{CH}_3)_3$ ); 23.2 (s,  $\text{CH}(\text{CH}_3)_2$ ).

$^{27}\text{Al}$  NMR ( $\text{CD}_2\text{Cl}_2$ ):  $\delta$  34.2 (s,  $[\text{Al}(\text{OC}(\text{CF}_3)_3)_4]^-$ ).

$^{19}\text{F}\{^1\text{H}\}$  ( $\text{CD}_2\text{Cl}_2$ ):  $\delta$  -75.7 (s,  $\text{OC}(\text{CF}_3)_3$ ).

## Preparation of 6

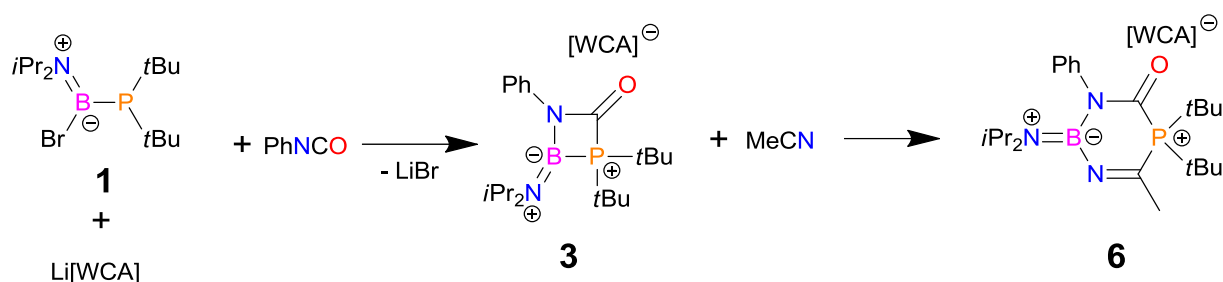

Scheme S4. Synthesis of 6

A solution of phenyl isocyanate in  $\text{CH}_2\text{Cl}_2$  (0.25 M, 1 mL) was added dropwise to a stirred suspension of **1** (0.084 g, 0.250 mmol) and  $\text{Li}[\text{Al}(\text{OC}(\text{CF}_3)_3)_4]$  (0.244 g, 0.250 mmol) in  $\text{CH}_2\text{Cl}_2$  (4 mL) at  $-70$  °C. The mixture was allowed to warm to room temperature and stirred overnight. After checking of the reaction progress by  $^{11}\text{B}$ ,  $^{31}\text{P}\{^1\text{H}\}$  and  $^{31}\text{P}$  NMR (100% conversion of **1** into **3**), to the stirred resulting mixture, a solution of acetonitrile in  $\text{CH}_2\text{Cl}_2$  (0.25 M, 1 mL) was added dropwise at  $-70$  °C. Again, the mixture was allowed to warm to room temperature and stirred overnight. After filtration of the precipitated LiBr, the resulting solution was concentrated to the half of volume and layered with 2 mL of pentane. Storage at  $+4$  °C gave suitable crystals for X-ray diffraction. Drying of crystals under high vacuum resulted in the removal of non-coordinated solvent molecule. Yield: 41% (0.142 g, 0.103 mmol). **Elemental analysis** calc. for  $\text{C}_{39}\text{H}_{40}\text{AlBF}_{36}\text{N}_3\text{O}_5\text{P}$  (1383.46 g/mol): C, 33.85; H, 2.91; N, 3.04. Found: C, 34.05; H, 2.82; N, 2.95.

## NMR data of 6

$^{11}\text{B}$  NMR ( $\text{CD}_2\text{Cl}_2$ ):  $\delta$  26.6 (s).

$^{31}\text{P}\{^1\text{H}\}$  NMR ( $\text{CD}_2\text{Cl}_2$ ):  $\delta$  10.9 (s).

$^1\text{H}$  NMR ( $\text{CD}_2\text{Cl}_2$ ):  $\delta$  7.42 (2 H, m, *o*-CH of Ph); 7.34 (1 H, m, *p*-CH of Ph); 7.16 (2 H, m, *m*-CH of Ph); 3.40 (1 H, sept,  $^3J_{\text{HH}} = 6.6$  Hz, CH(CH<sub>3</sub>)<sub>2</sub>); 3.25 (1 H, sept,  $^3J_{\text{HH}} = 6.9$  Hz, CH(CH<sub>3</sub>)<sub>2</sub>); 2.75 (3 H, d,  $^3J_{\text{PH}} = 5.9$  Hz, NCCH<sub>3</sub>); 1.58 (18 H, d,  $^3J_{\text{PH}} = 16.7$  Hz, C(CH<sub>3</sub>)<sub>3</sub>); 1.33 (6 H, d,  $^3J_{\text{HH}} = 6.9$  Hz, CH(CH<sub>3</sub>)<sub>2</sub>); 0.56 (6 H, d,  $^3J_{\text{HH}} = 6.6$  Hz, CH(CH<sub>3</sub>)<sub>2</sub>).

$^{13}\text{C}\{^1\text{H}\}$  NMR ( $\text{CD}_2\text{Cl}_2$ ):  $\delta$  163.0 (d,  $^1J_{\text{CP}} = 77.3$  Hz, NCO); 159.1 (d,  $^2J_{\text{CP}} = 10.9$  Hz, NCCH<sub>3</sub>); 136.9 (d,  $^3J_{\text{CP}} = 3.1$  Hz, *ipso*-C of Ph); 129.5 (s, *o*-CH of PPh); 128.7 (s, *p*-CH of PPh); 127.1 (s, *m*-CH of PPh); 121.3 (q,  $^1J_{\text{CF}} = 293.0$  Hz, OC(CF<sub>3</sub>)<sub>3</sub>); 50.1 (s, CH(CH<sub>3</sub>)<sub>2</sub>); 46.2 (s, CH(CH<sub>3</sub>)<sub>2</sub>); 39.2 (d,  $^1J_{\text{CP}} = 14.5$  Hz, C(CH<sub>3</sub>)<sub>3</sub>); 33.8 (d,  $^2J_{\text{CP}} = 34.6$  Hz, NCCH<sub>3</sub>); 28.1 (s, C(CH<sub>3</sub>)<sub>3</sub>); 25.2 (s, CH(CH<sub>3</sub>)<sub>2</sub>); 19.7 (s, CH(CH<sub>3</sub>)<sub>2</sub>).

$^{27}\text{Al}$  NMR ( $\text{CD}_2\text{Cl}_2$ ):  $\delta$  34.2 (s, [Al(OC(CF<sub>3</sub>)<sub>3</sub>)<sub>4</sub>]<sup>-</sup>).

$^{19}\text{F}\{^1\text{H}\}$  ( $\text{CD}_2\text{Cl}_2$ ):  $\delta$  -75.7 (s, OC(CF<sub>3</sub>)<sub>3</sub>).

## NMR spectra of isolated compounds

### Abbreviations

- s deuterated solvent (residual signal)
- g grease
- ★ impurity
- *i*Pr<sub>2</sub>NBBr<sub>2</sub>
- *t*Bu<sub>2</sub>PH

# NMR spectra of 3

11B

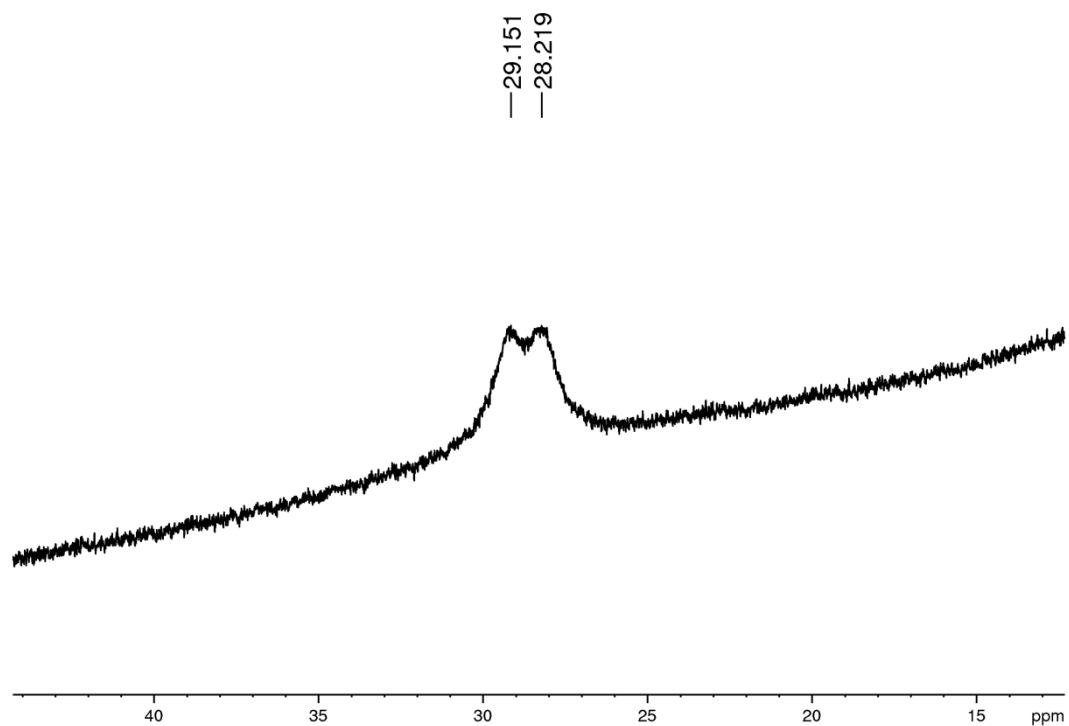

Figure S1.  $^{11}\text{B}$  spectrum ( $\text{CD}_2\text{Cl}_2$ ) of 3

$^{31}\text{P}\{^1\text{H}\}$

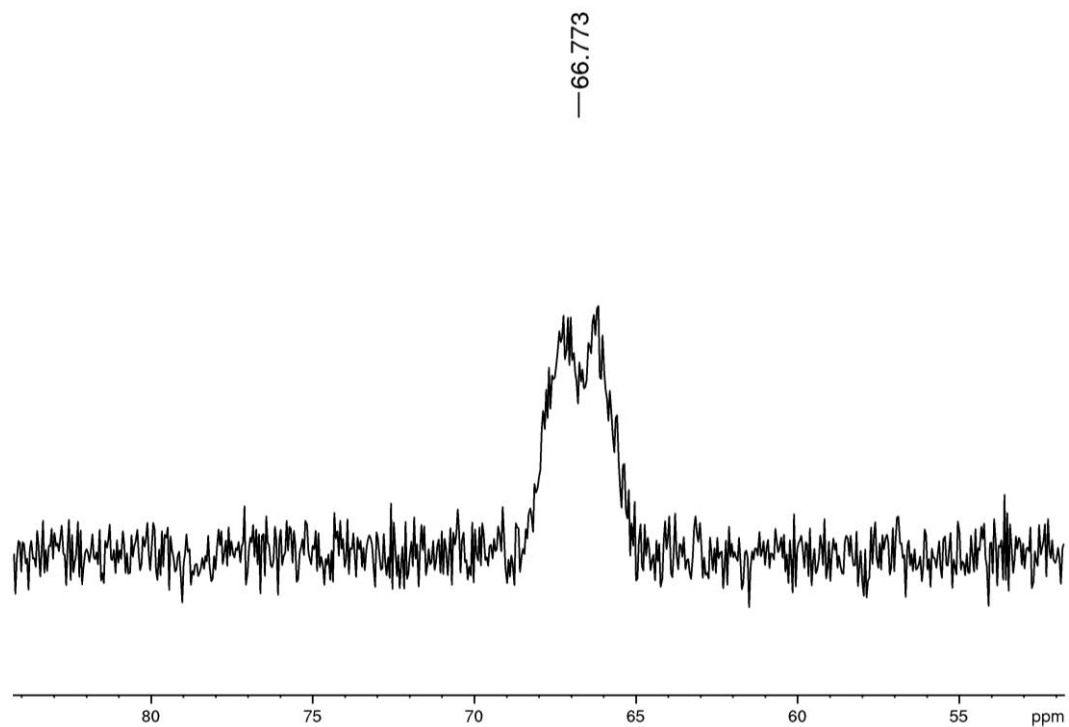

Figure S2.  $^{31}\text{P}\{^1\text{H}\}$  spectrum ( $\text{CD}_2\text{Cl}_2$ ) of 3



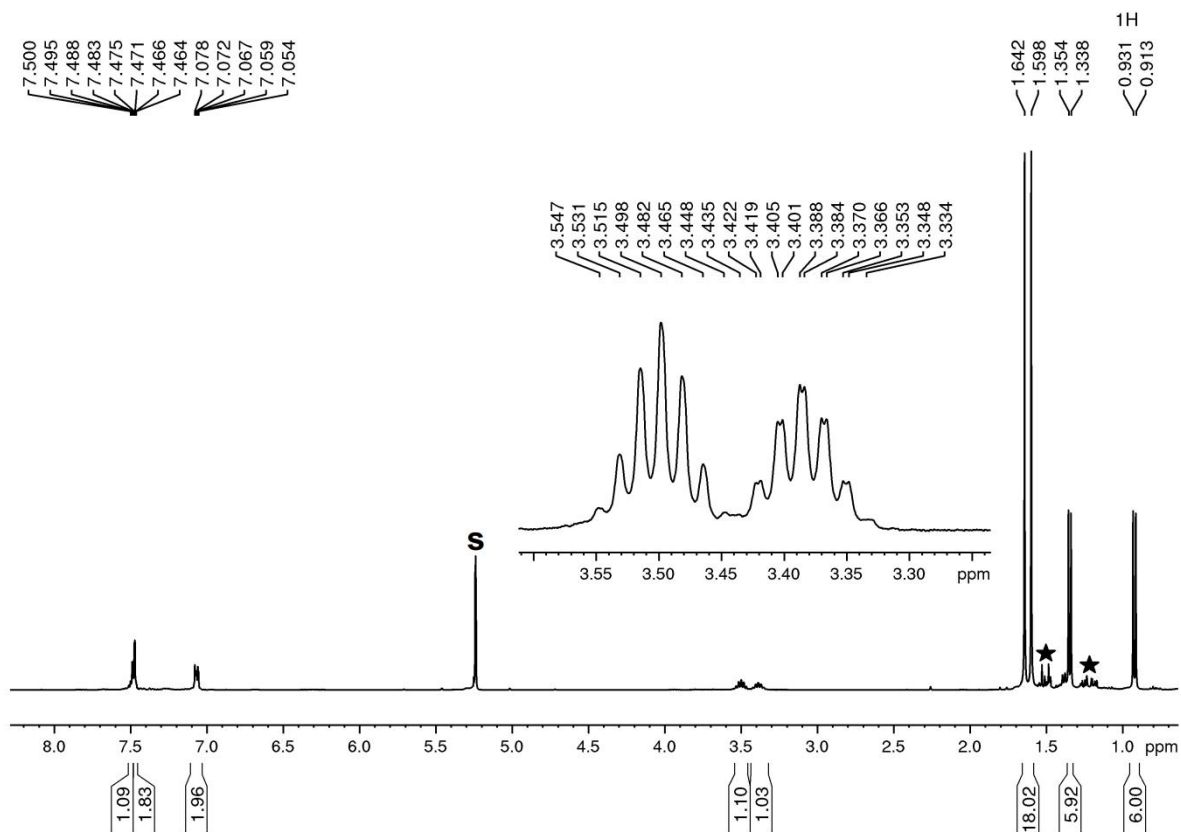

Figure S3.  $^1\text{H}$  spectrum ( $\text{CD}_2\text{Cl}_2$ ) of **3**

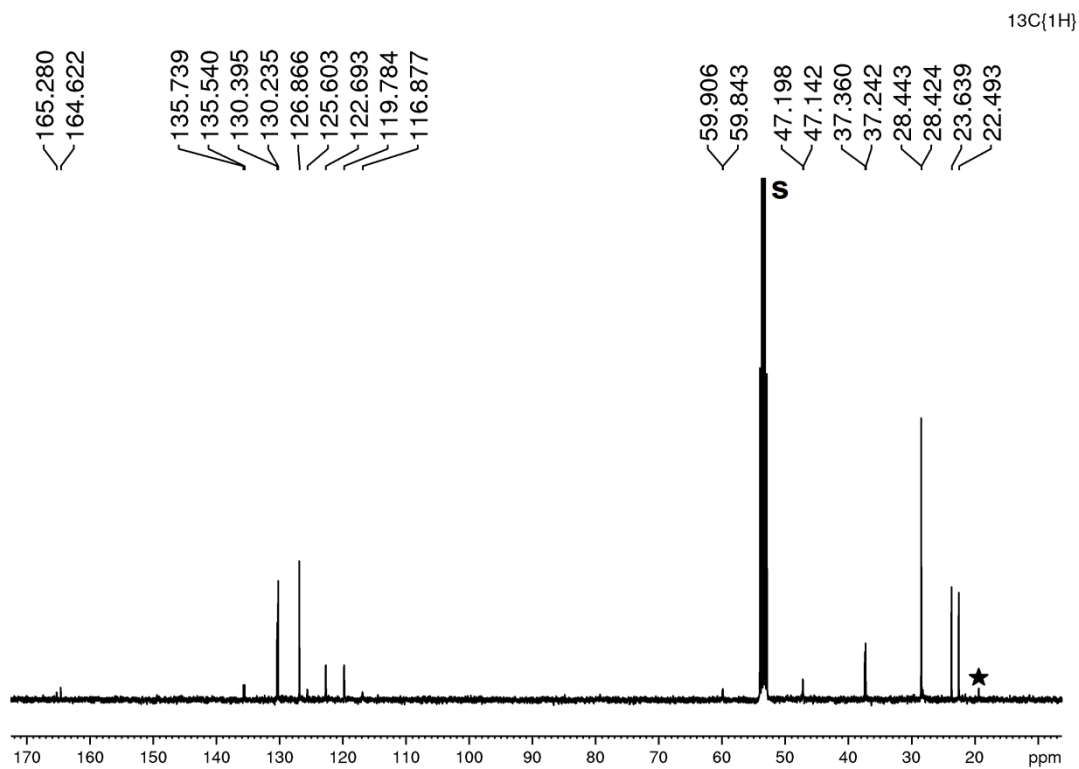

Figure S4.  $^{13}\text{C}\{^1\text{H}\}$  spectrum ( $\text{CD}_2\text{Cl}_2$ ) of **3**

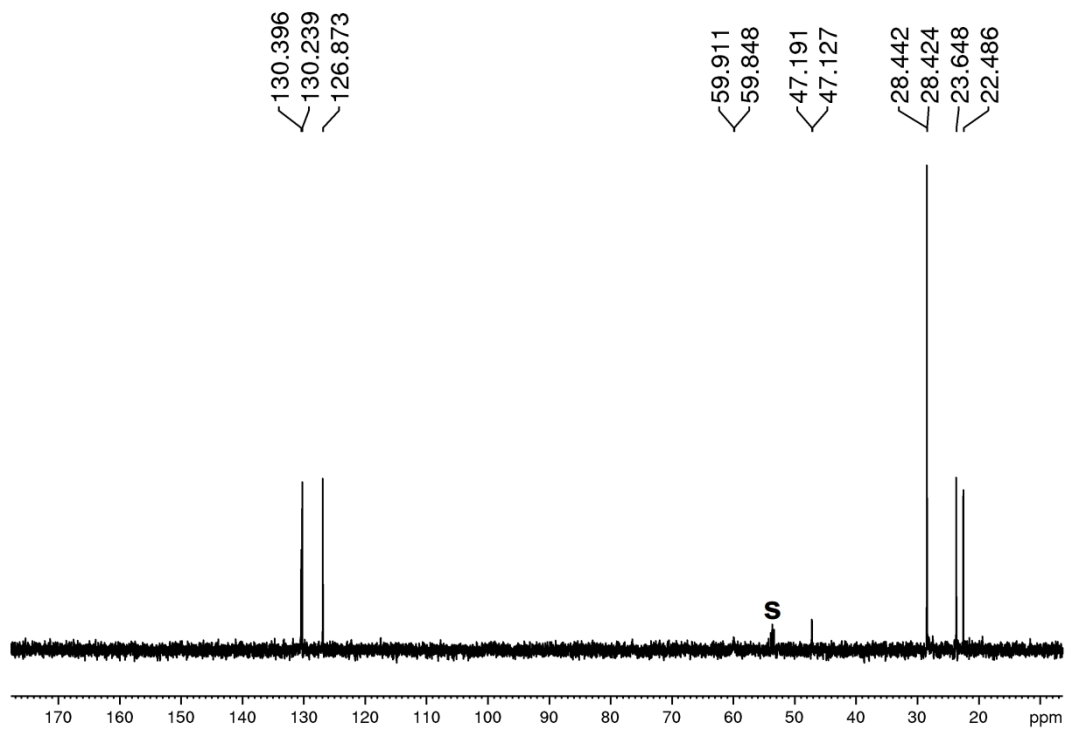

Figure S5.  $^{135}\text{DEPT}$  spectrum ( $\text{CD}_2\text{Cl}_2$ ) of **3**

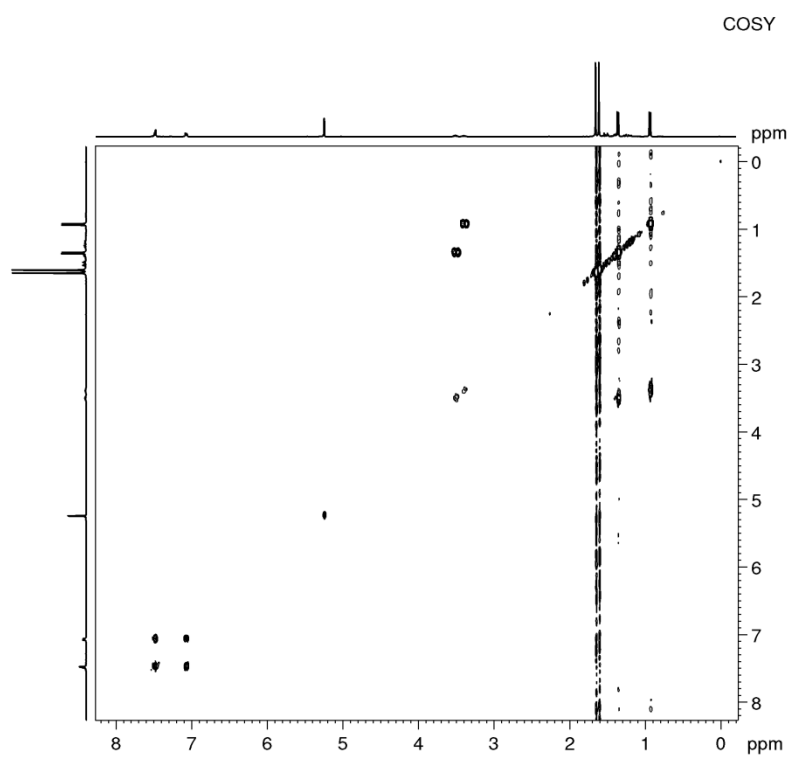

Figure S6. COSY spectrum ( $\text{CD}_2\text{Cl}_2$ ) of **3**

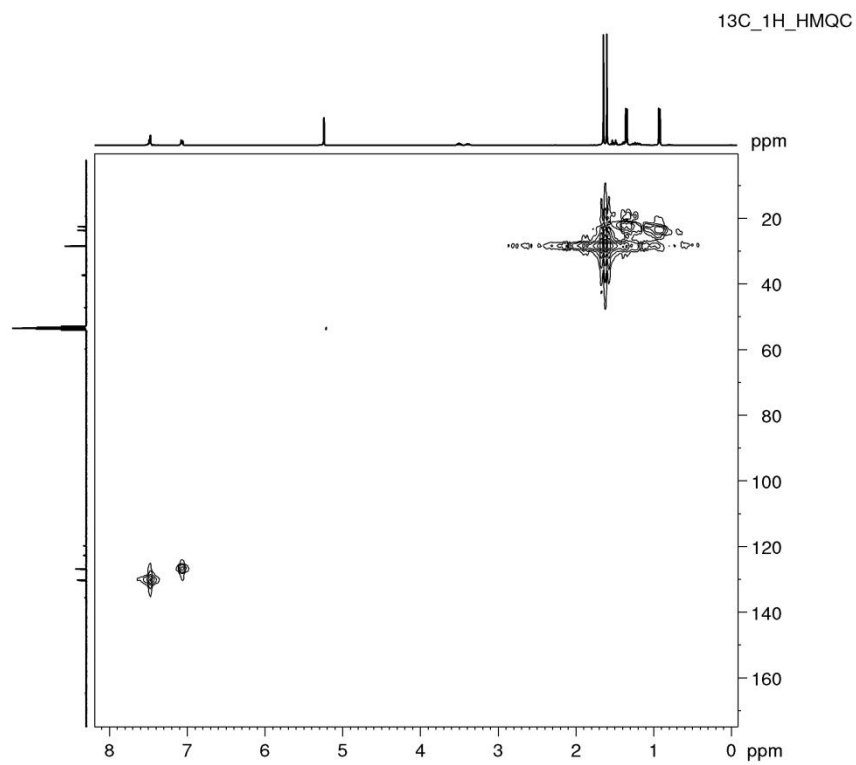

**Figure S7.**  $^{13}\text{C}$   $^1\text{H}$  HMQC spectrum ( $\text{CD}_2\text{Cl}_2$ ) of **3**

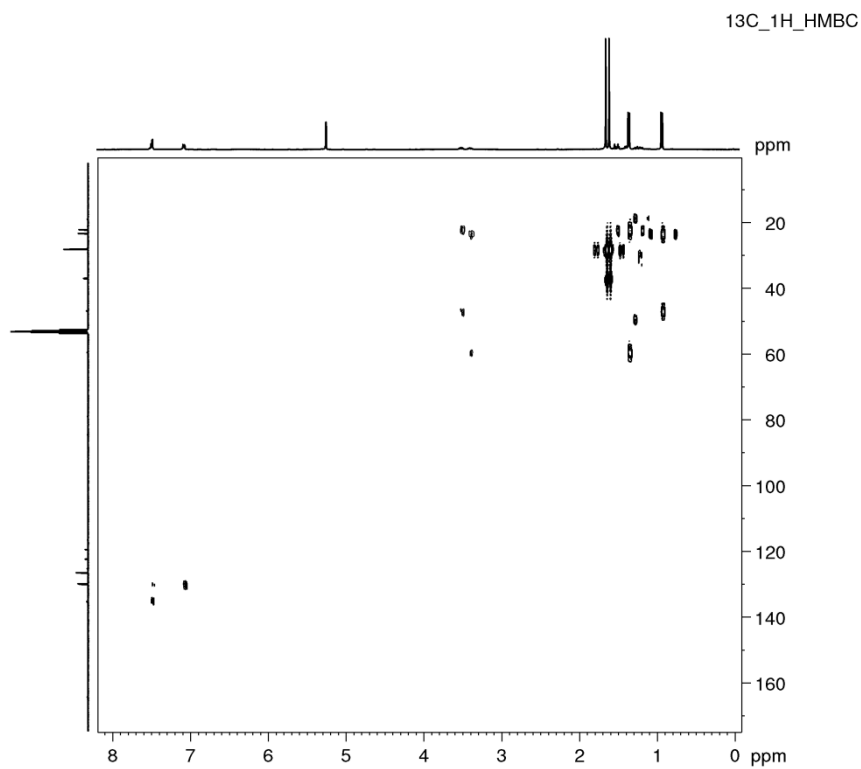

**Figure S8.**  $^{13}\text{C}$   $^1\text{H}$  HMBC spectrum ( $\text{CD}_2\text{Cl}_2$ ) of **3**

27Al

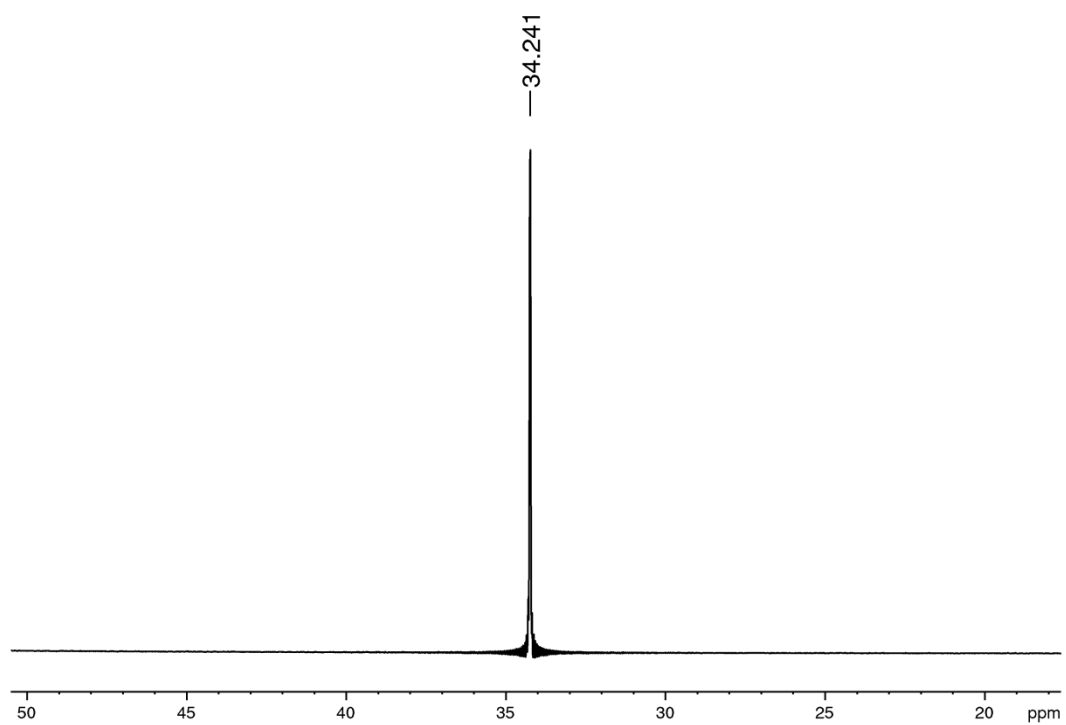

Figure S9.  $^{27}\text{Al}$  spectrum ( $\text{CD}_2\text{Cl}_2$ ) of **3**

$^{19}\text{F}\{^1\text{H}\}$

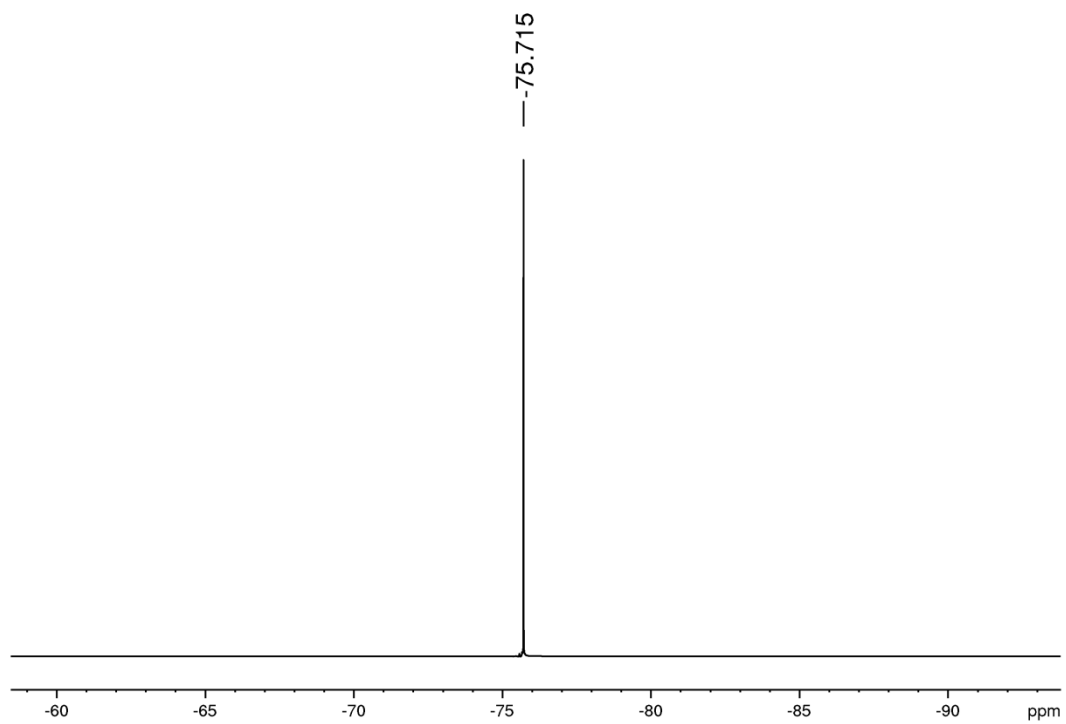

Figure S10.  $^{19}\text{F}\{^1\text{H}\}$  spectrum ( $\text{CD}_2\text{Cl}_2$ ) of **3**

# NMR spectra of 4

11B

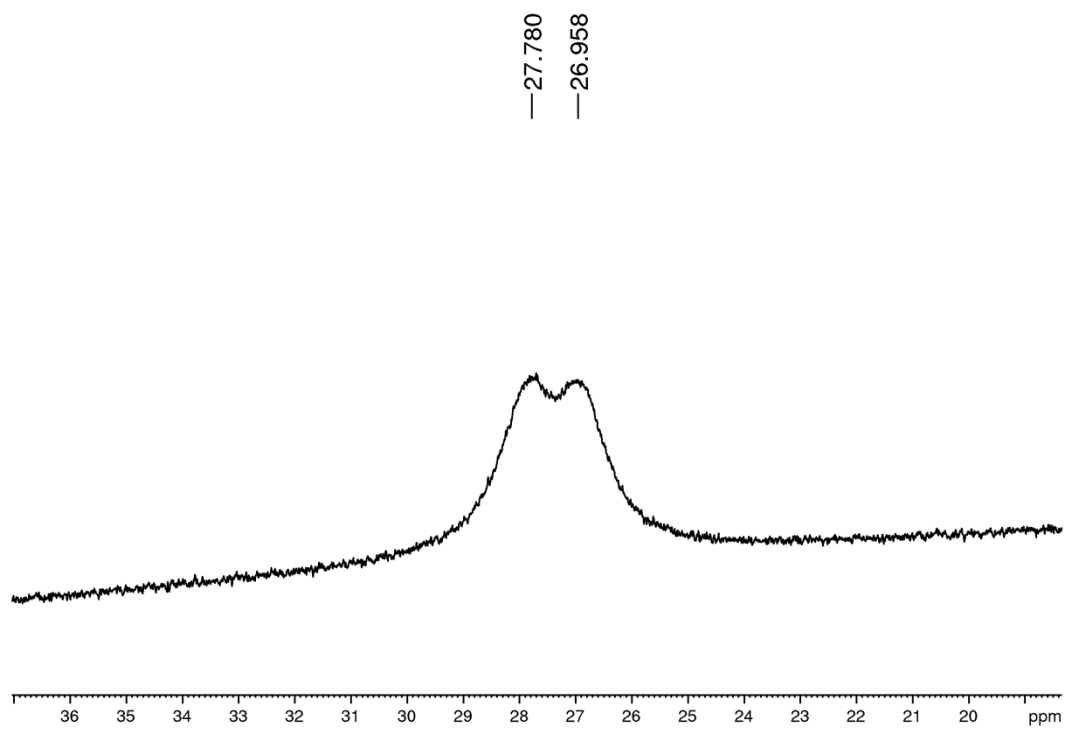

Figure S11.  $^{11}\text{B}$  spectrum ( $\text{CD}_2\text{Cl}_2$ ) of 4

$^{31}\text{P}\{^1\text{H}\}$

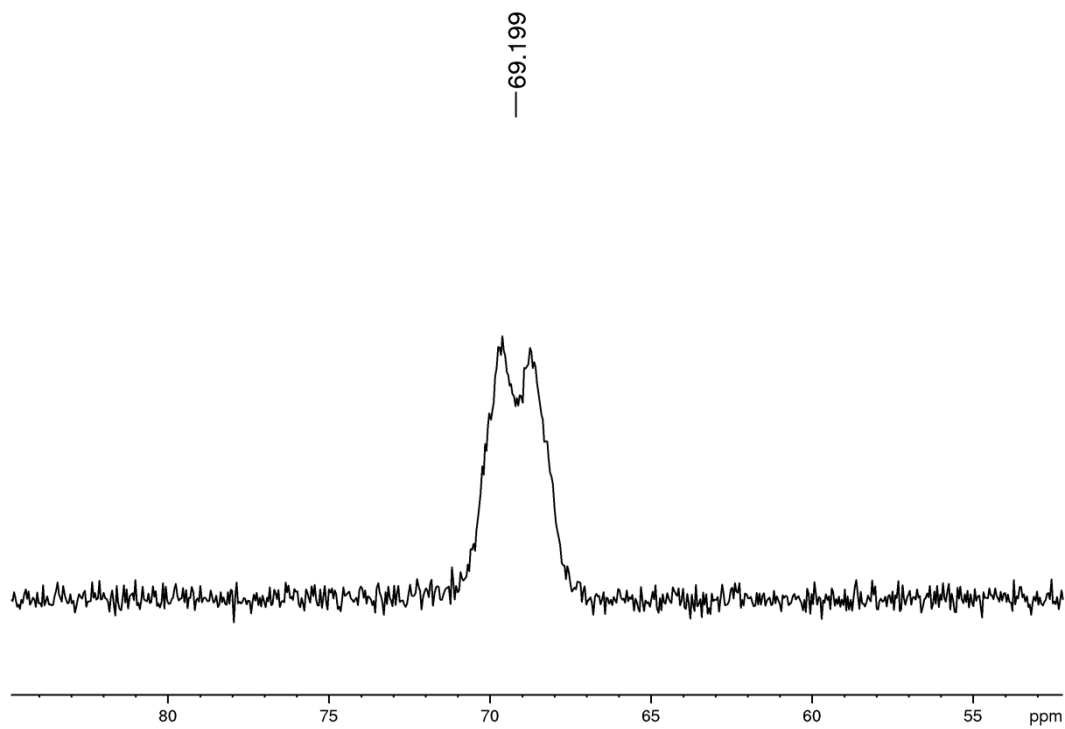

Figure S12.  $^{31}\text{P}\{^1\text{H}\}$  spectrum ( $\text{CD}_2\text{Cl}_2$ ) of 4

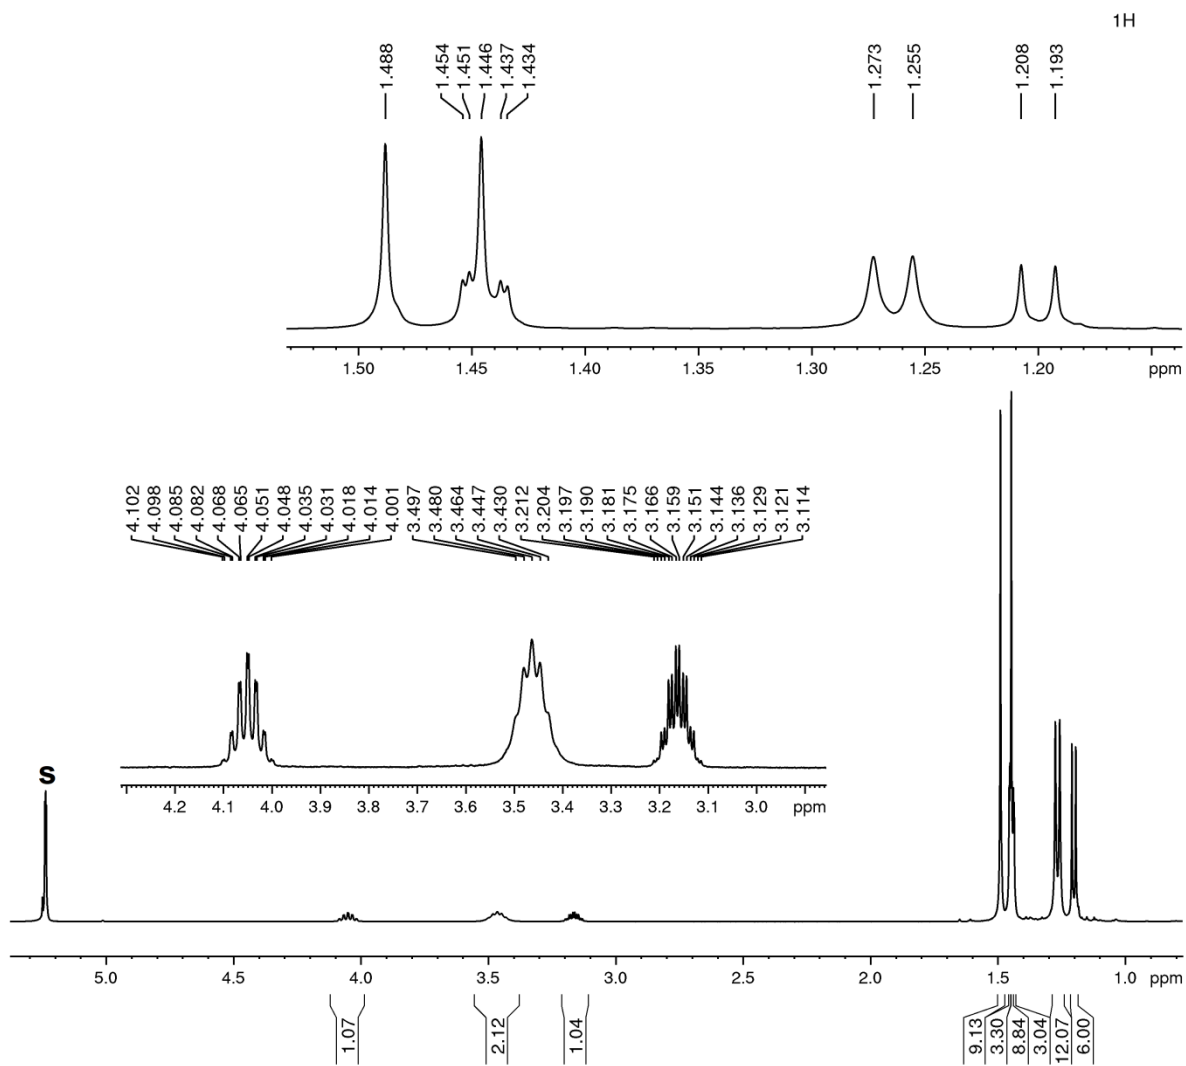

Figure S13. <sup>1</sup>H spectrum (CD<sub>2</sub>Cl<sub>2</sub>) of **4**

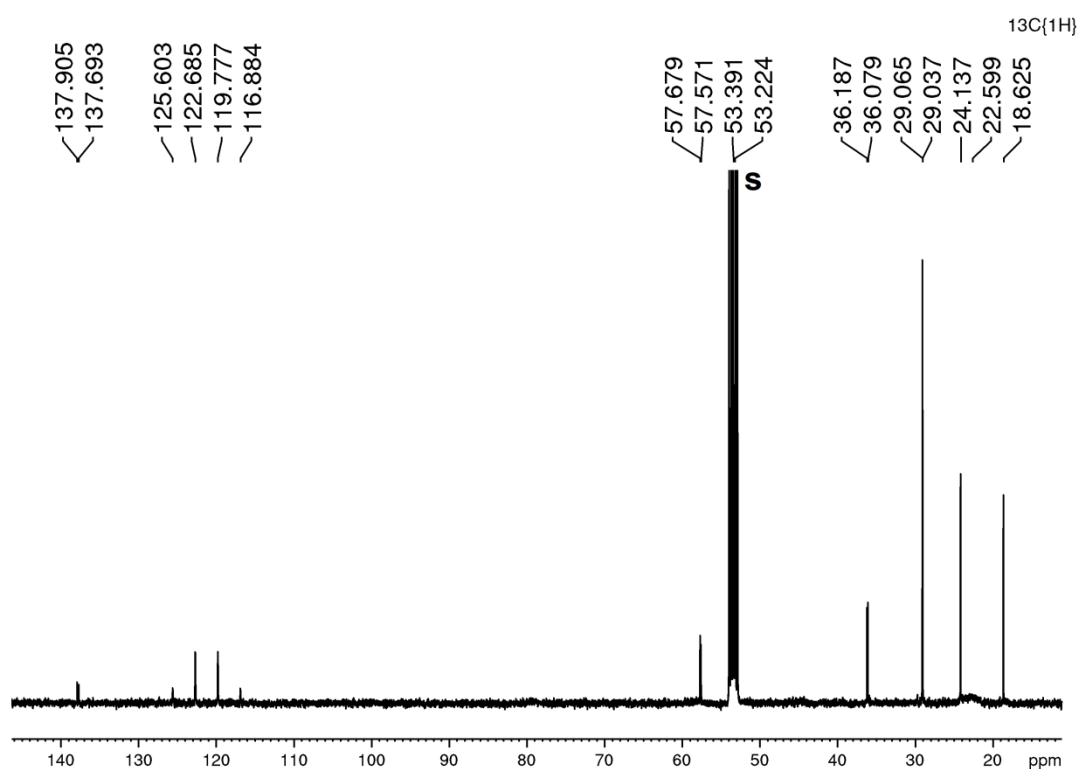

Figure S14. <sup>13</sup>C{<sup>1</sup>H} spectrum (CD<sub>2</sub>Cl<sub>2</sub>) of **4**

DEPT135

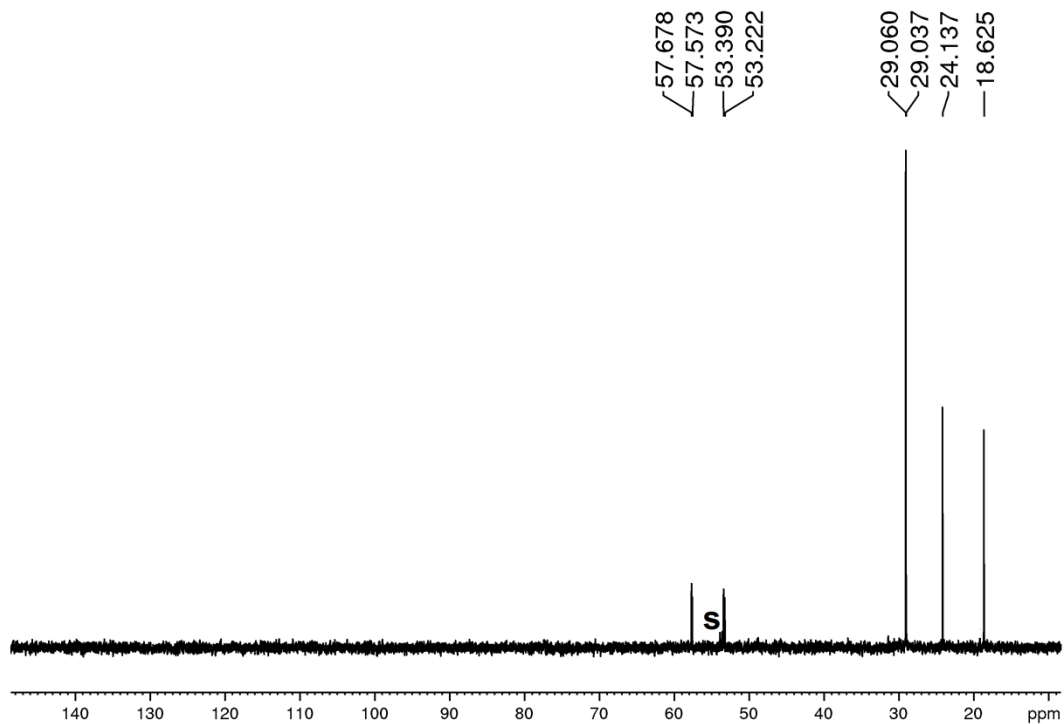

Figure S15.  $^{135}\text{DEPT}$  spectrum ( $\text{CD}_2\text{Cl}_2$ ) of **4**

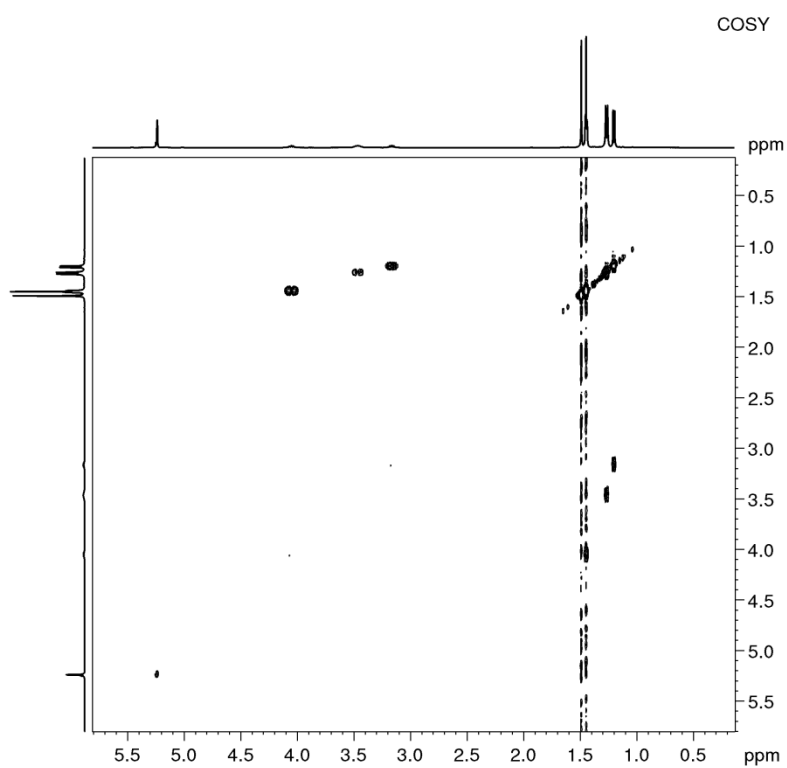

Figure S16. COSY spectrum ( $\text{CD}_2\text{Cl}_2$ ) of **4**

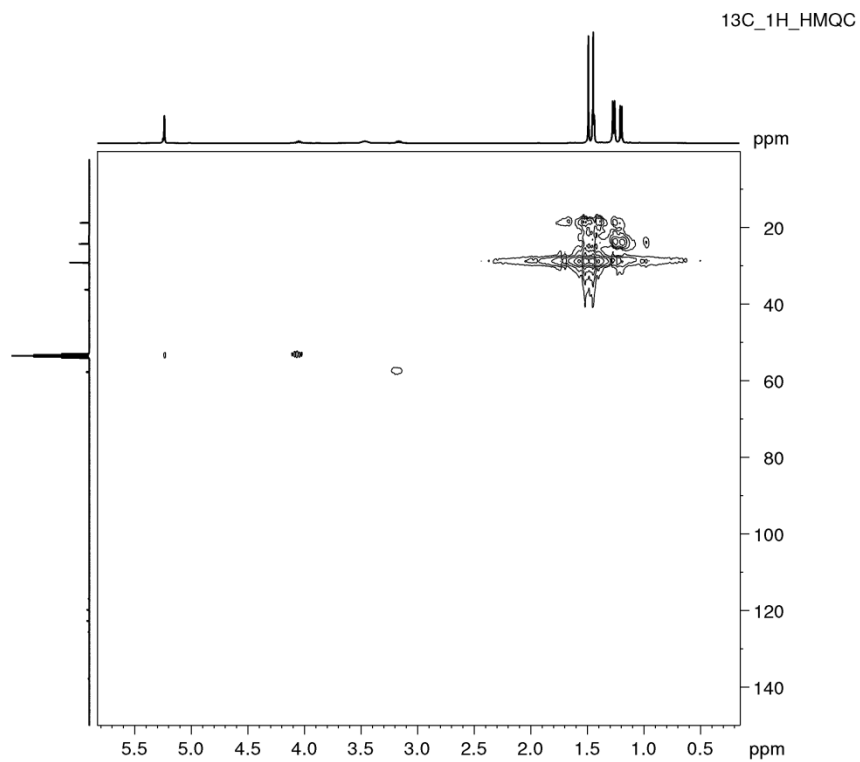

**Figure S17.**  $^{13}\text{C}$   $^1\text{H}$  HMQC spectrum ( $\text{CD}_2\text{Cl}_2$ ) of **4**

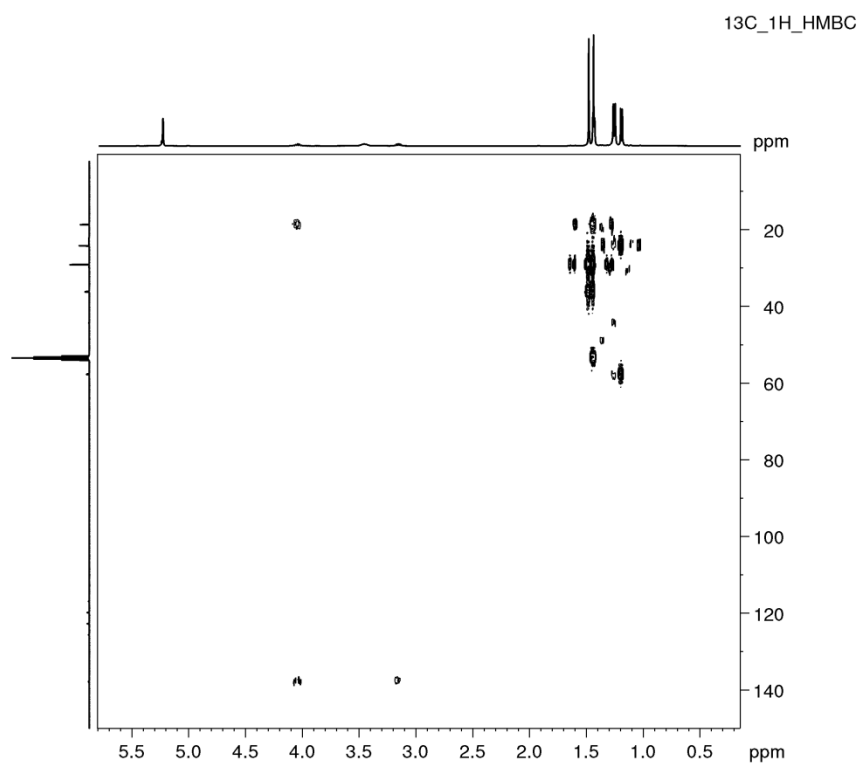

**Figure S18.**  $^{13}\text{C}$   $^1\text{H}$  HMBC spectrum ( $\text{CD}_2\text{Cl}_2$ ) of **4**



$^{27}\text{Al}$

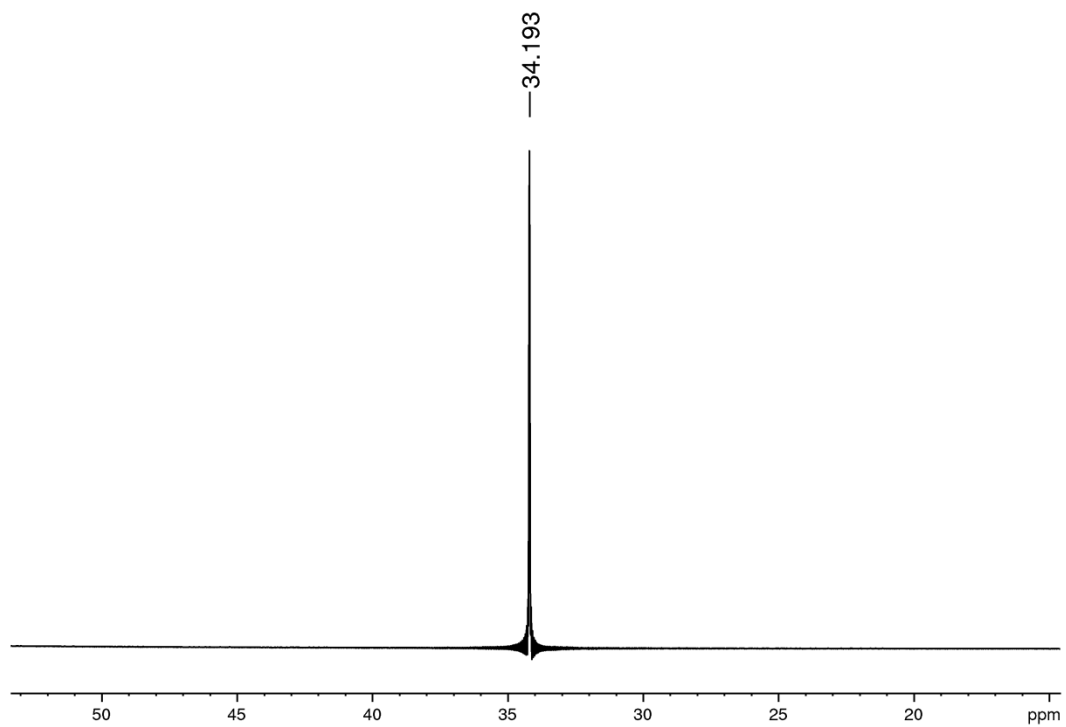

**Figure S19.**  $^{27}\text{Al}$  spectrum ( $\text{CD}_2\text{Cl}_2$ ) of **4**

$^{19}\text{F}\{^1\text{H}\}$

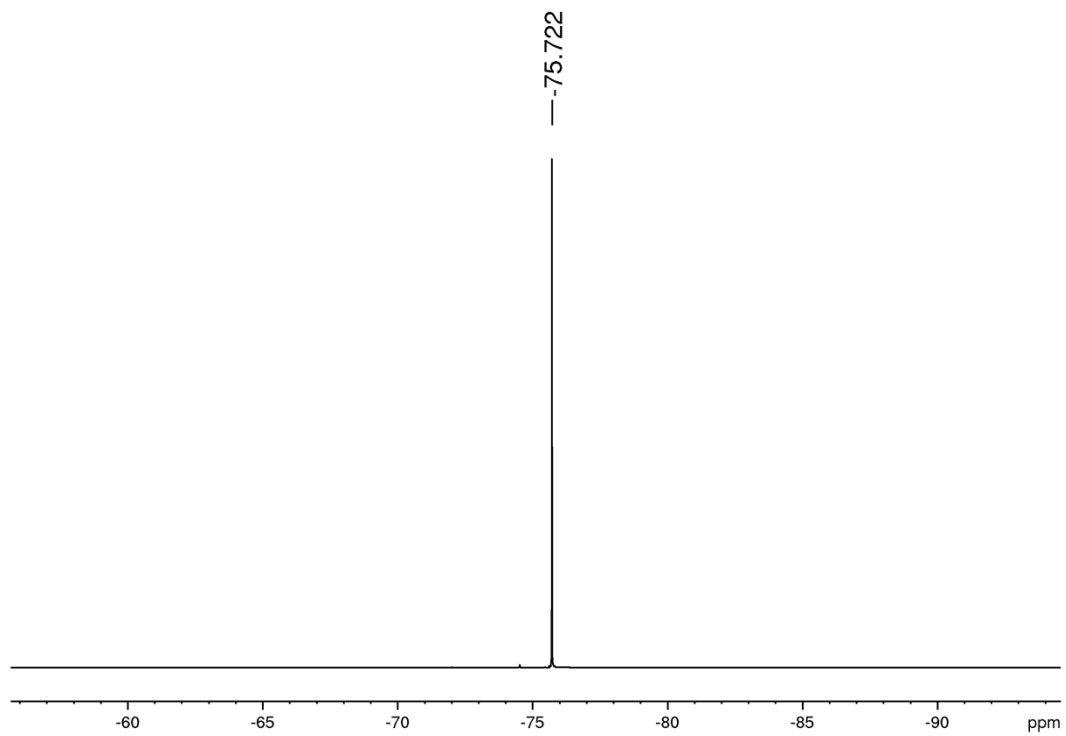

**Figure S20.**  $^{19}\text{F}\{^1\text{H}\}$  spectrum ( $\text{CD}_2\text{Cl}_2$ ) of **4**

# NMR spectra of 5

11B

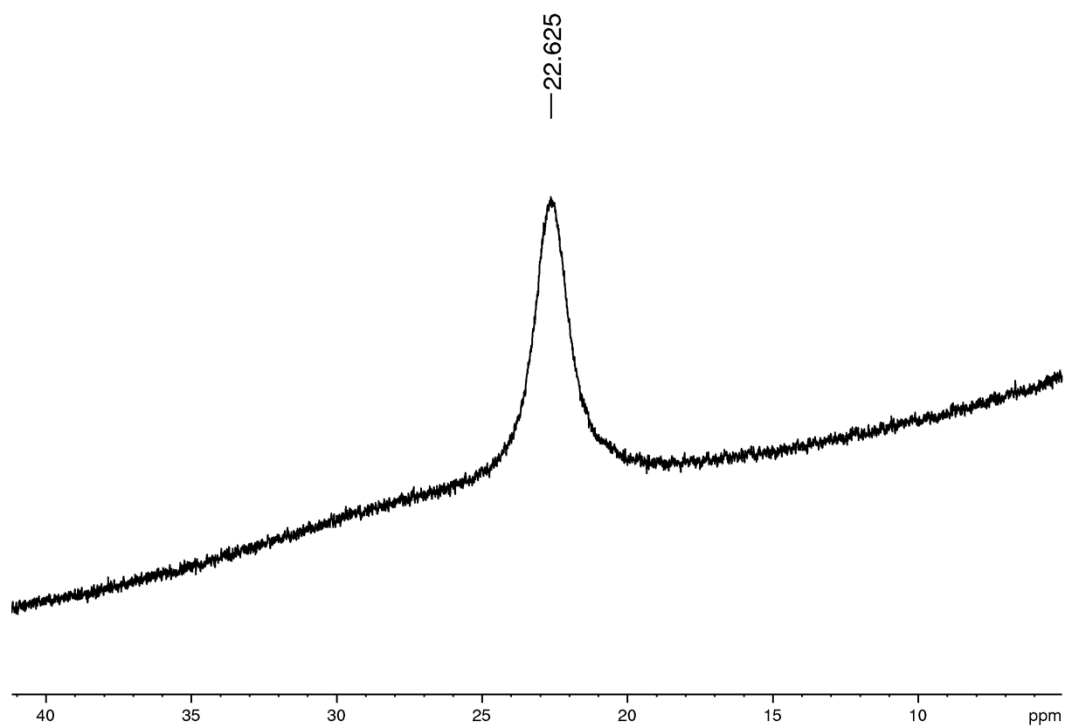

Figure S21.  $^{11}\text{B}$  spectrum ( $\text{CD}_2\text{Cl}_2$ ) of 5

$^{31}\text{P}\{^1\text{H}\}$

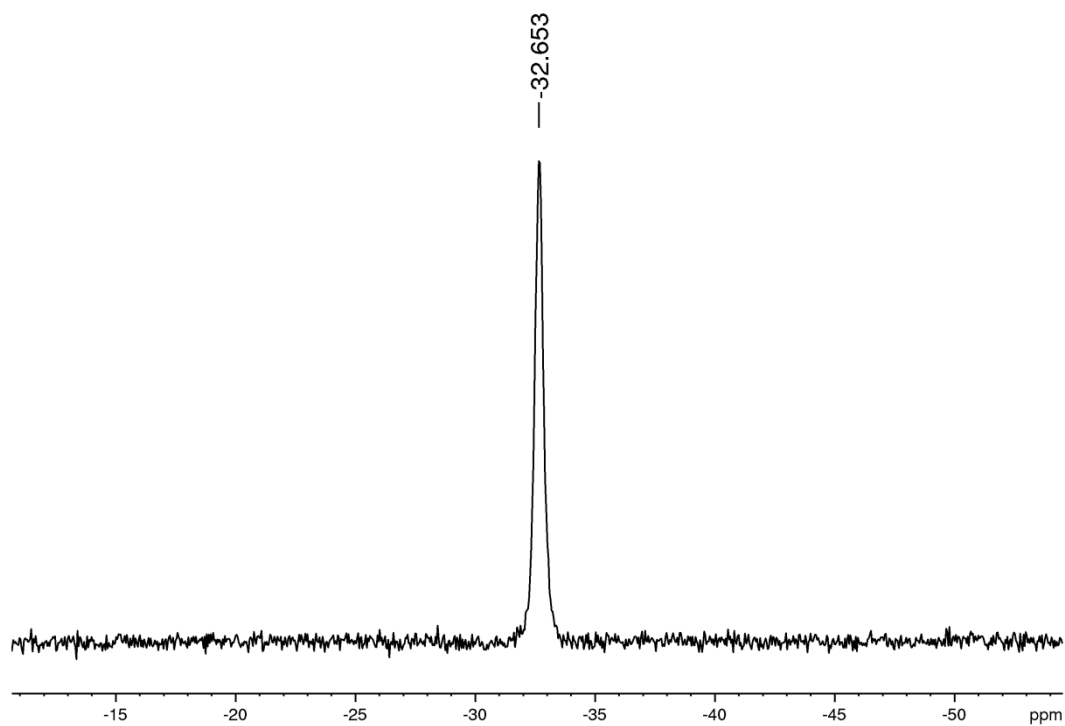

Figure S22.  $^{31}\text{P}\{^1\text{H}\}$  spectrum ( $\text{CD}_2\text{Cl}_2$ ) of 5

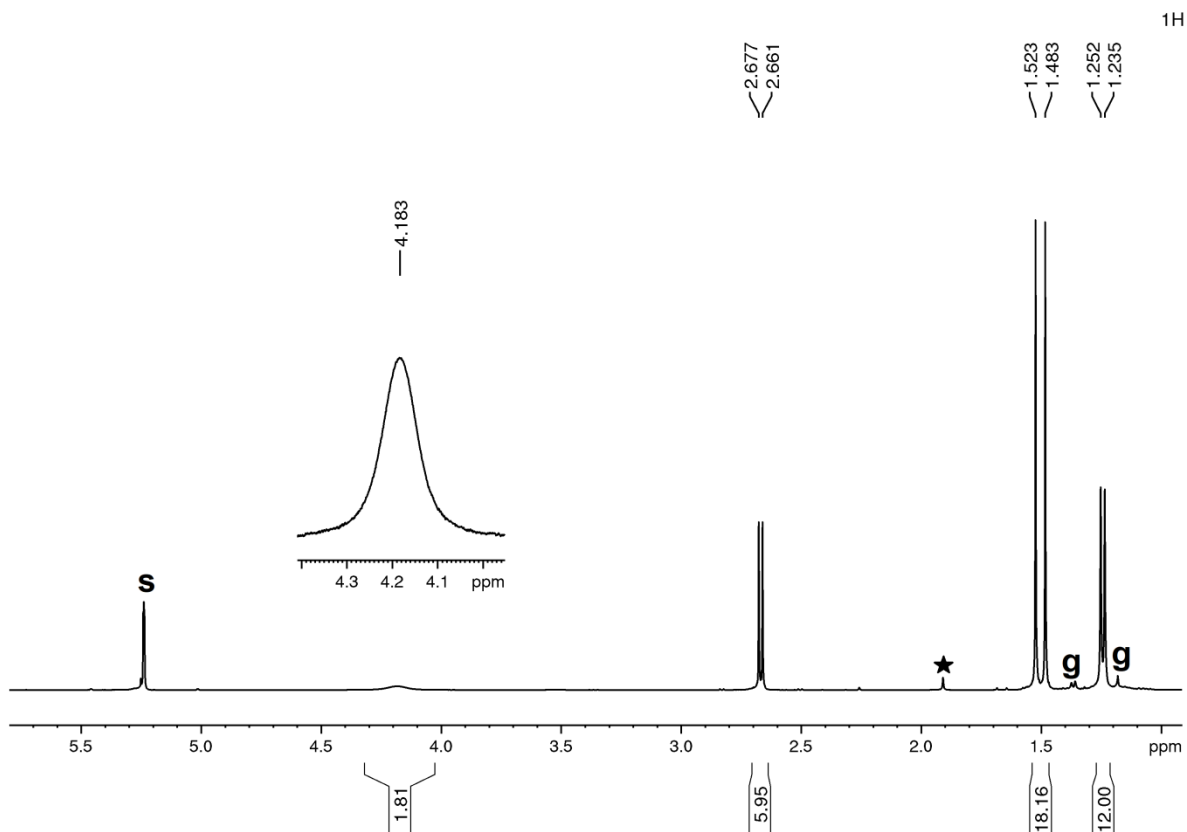

Figure S23.  $^1\text{H}$  spectrum ( $\text{CD}_2\text{Cl}_2$ ) of **5**

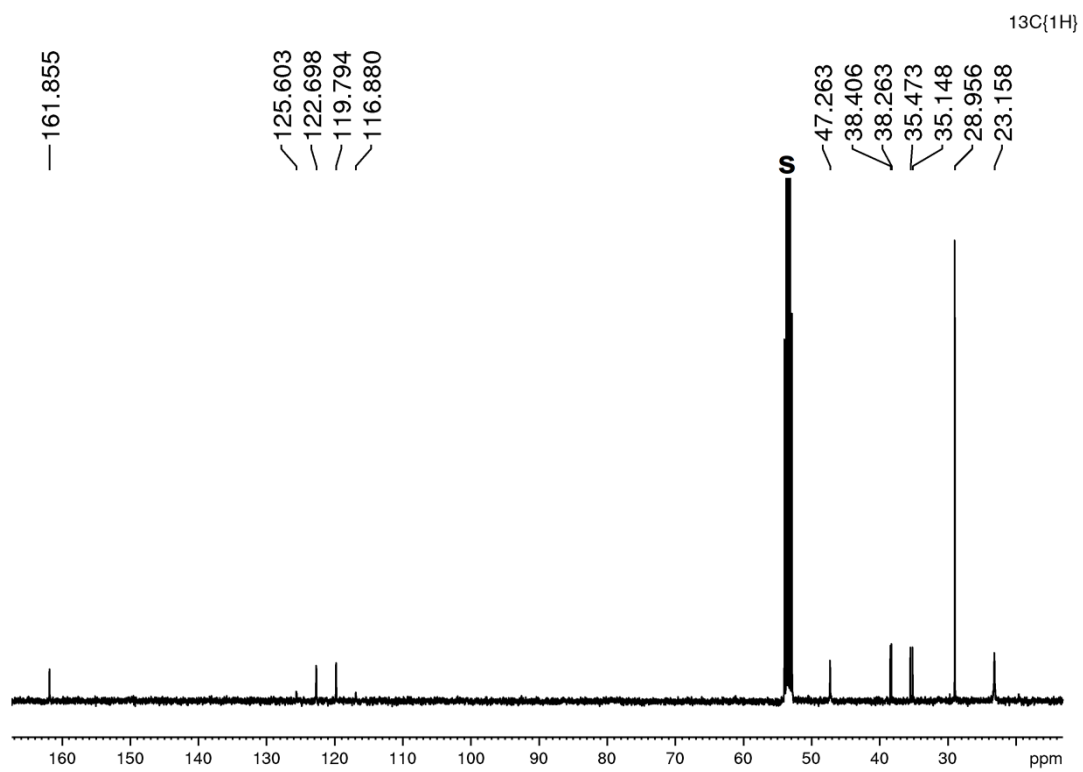

Figure S24.  $^{13}\text{C}\{^1\text{H}\}$  spectrum ( $\text{CD}_2\text{Cl}_2$ ) of **5**

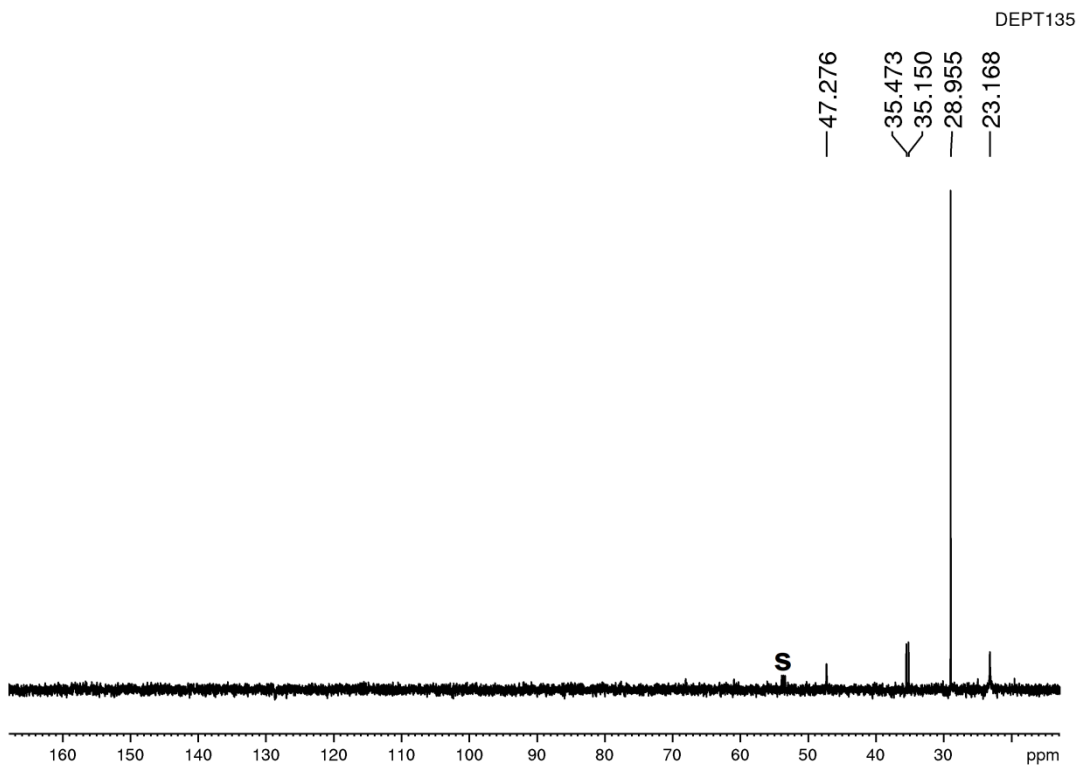

Figure S25.  $^{135}\text{DEPT}$  spectrum ( $\text{CD}_2\text{Cl}_2$ ) of 5

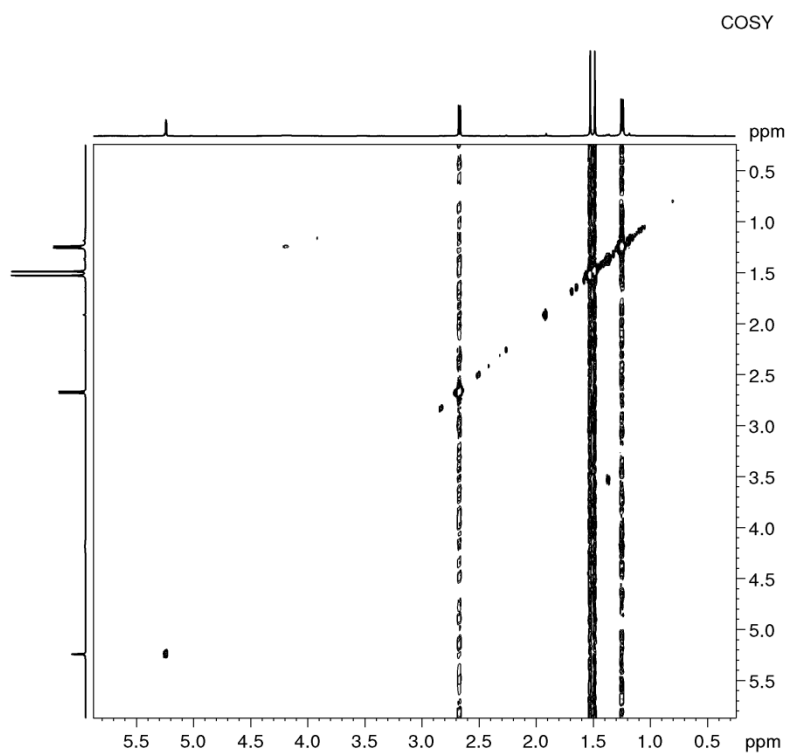

Figure S26. COSY spectrum ( $\text{CD}_2\text{Cl}_2$ ) of 5

13C\_1H\_HMQC

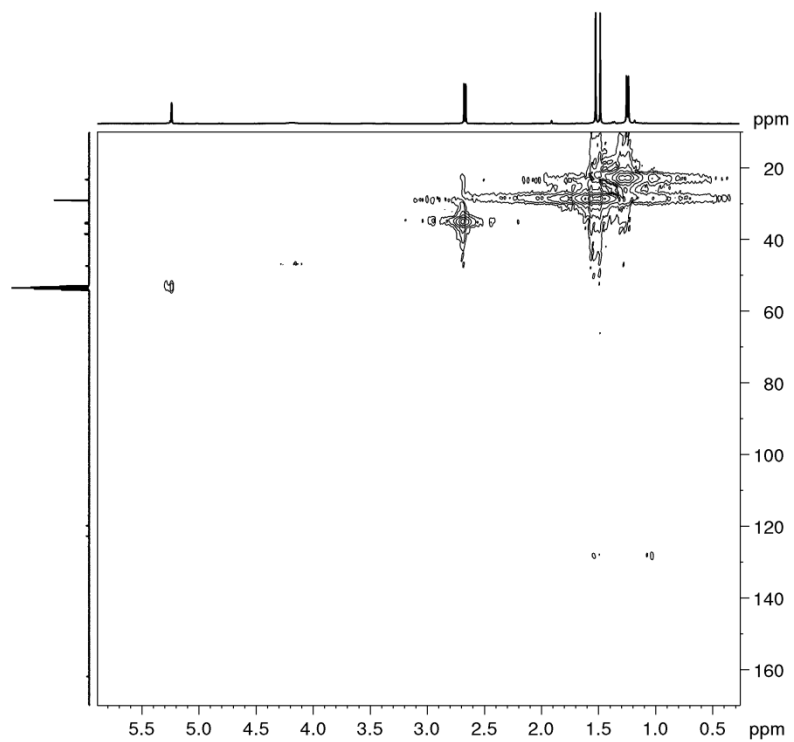

Figure S27.  $^{13}\text{C}$   $^1\text{H}$  HMQC spectrum ( $\text{CD}_2\text{Cl}_2$ ) of **5**

13C\_1H\_HMBC

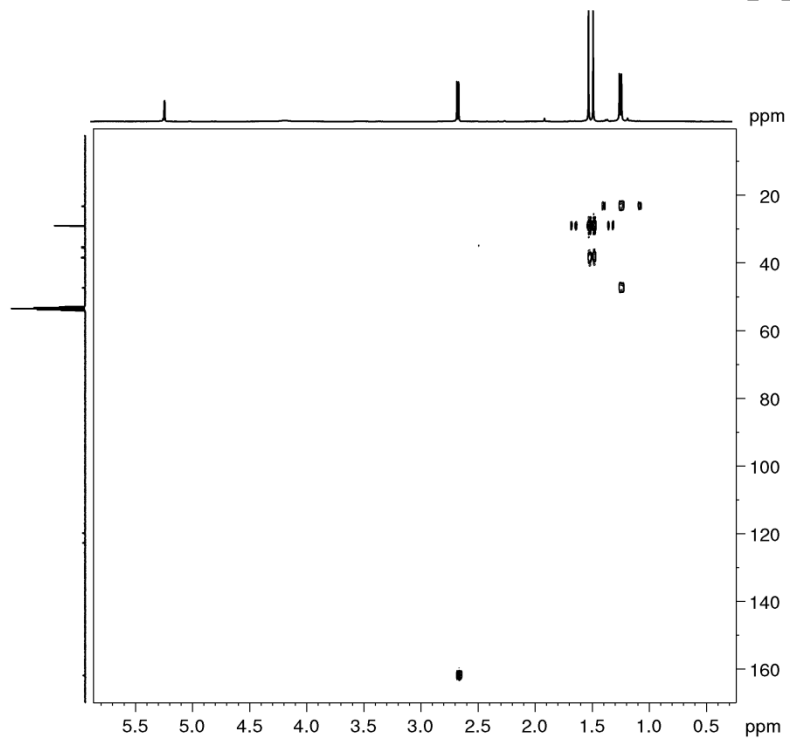

Figure S28.  $^{13}\text{C}$   $^1\text{H}$  HMBC spectrum ( $\text{CD}_2\text{Cl}_2$ ) of **5**

<sup>27</sup>Al

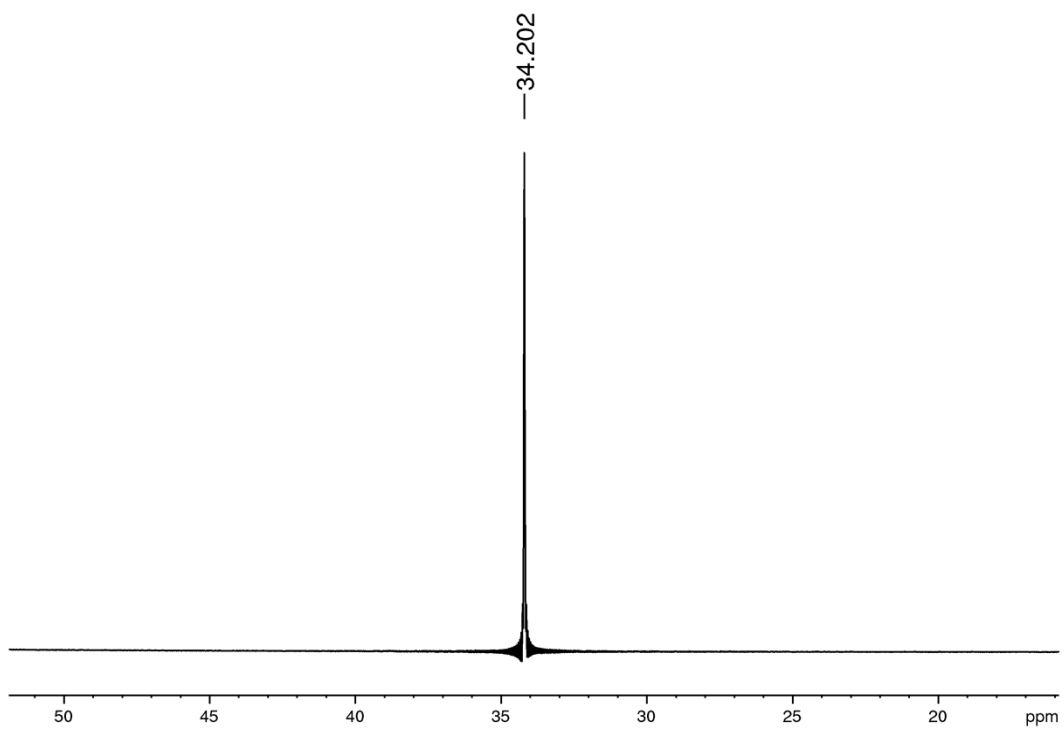

Figure S29. <sup>27</sup>Al spectrum (CD<sub>2</sub>Cl<sub>2</sub>) of **5**

<sup>19</sup>F{<sup>1</sup>H}

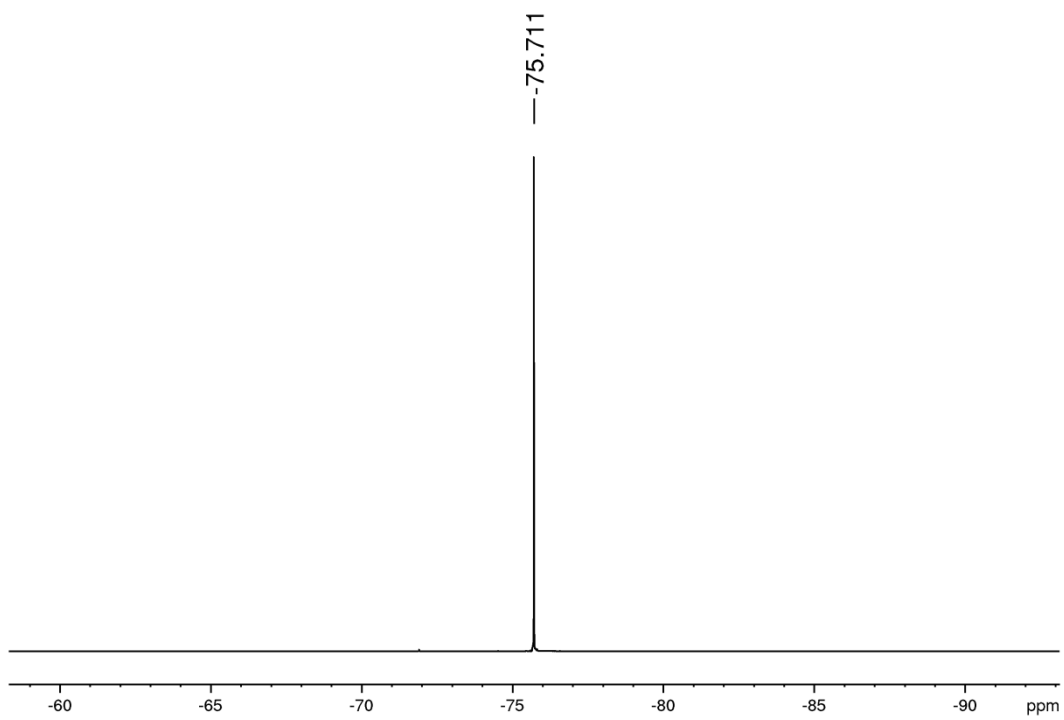

Figure S30. <sup>19</sup>F{<sup>1</sup>H} spectrum (CD<sub>2</sub>Cl<sub>2</sub>) of **5**

# NMR spectra of 6

11B

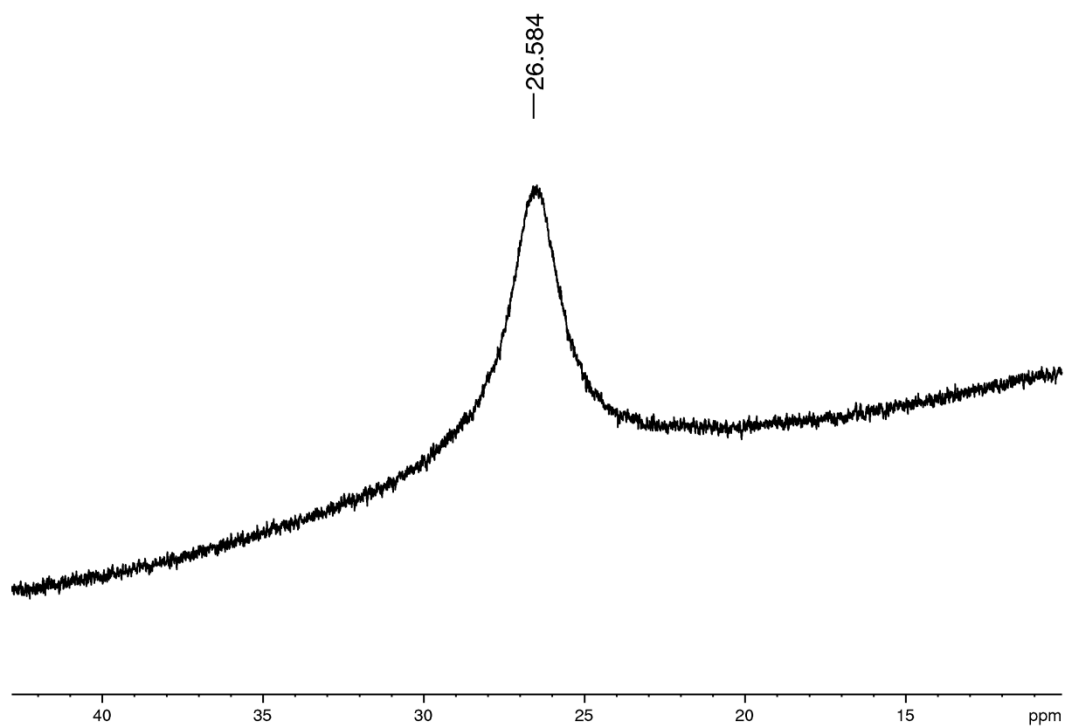

Figure S31.  $^{11}\text{B}$  spectrum ( $\text{CD}_2\text{Cl}_2$ ) of 6

$^{31}\text{P}\{^1\text{H}\}$

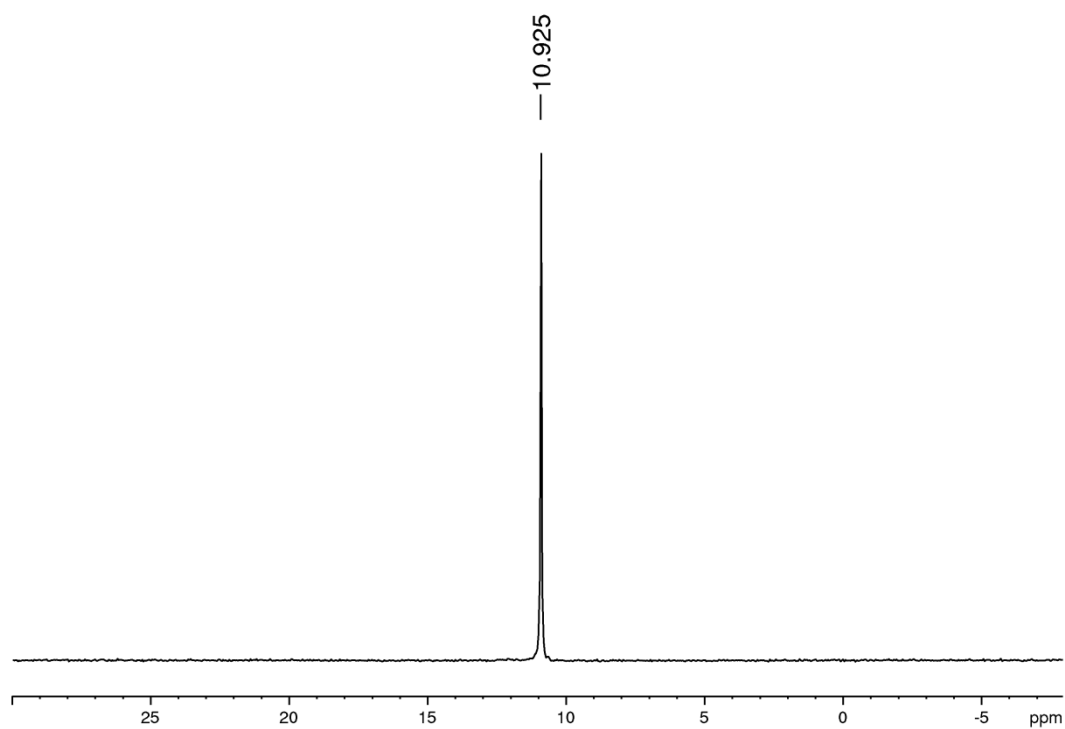

Figure S32.  $^{31}\text{P}\{^1\text{H}\}$  spectrum ( $\text{CD}_2\text{Cl}_2$ ) of 6

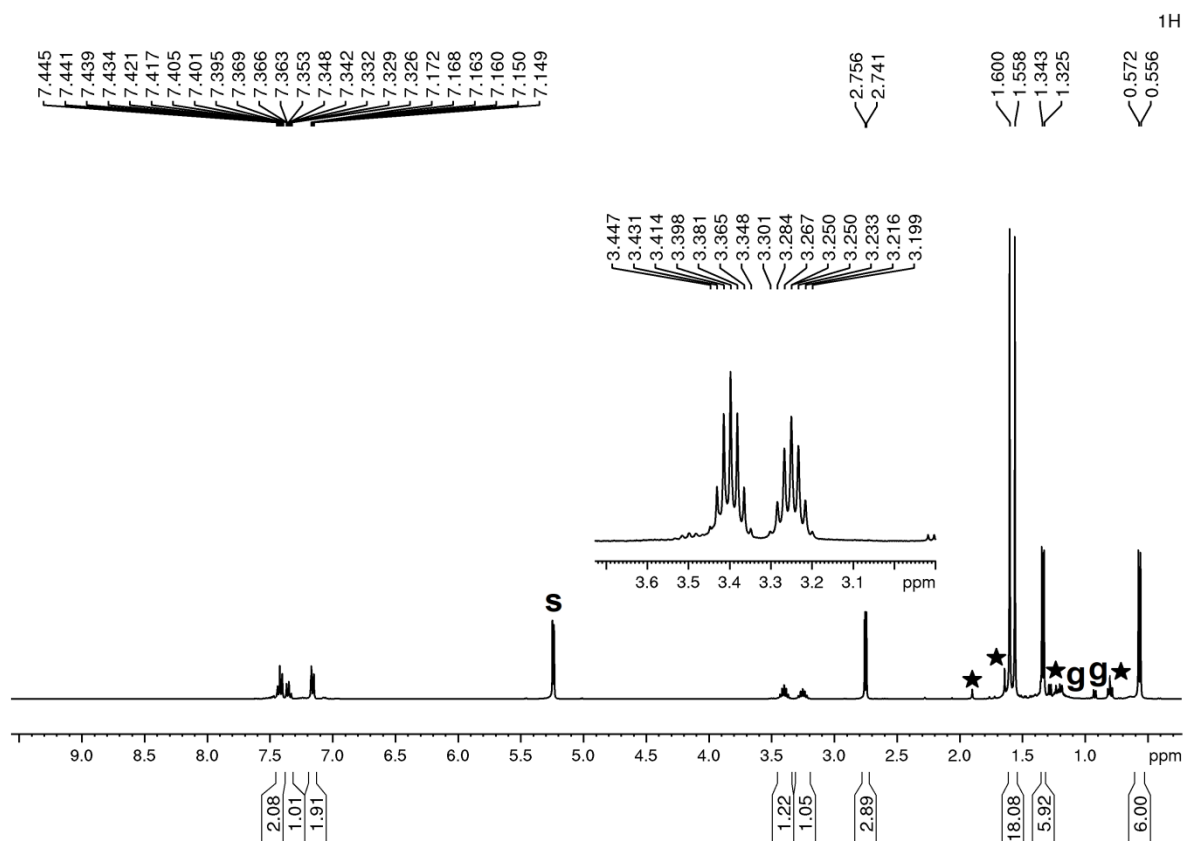

Figure S33. <sup>1</sup>H spectrum (CD<sub>2</sub>Cl<sub>2</sub>) of 6

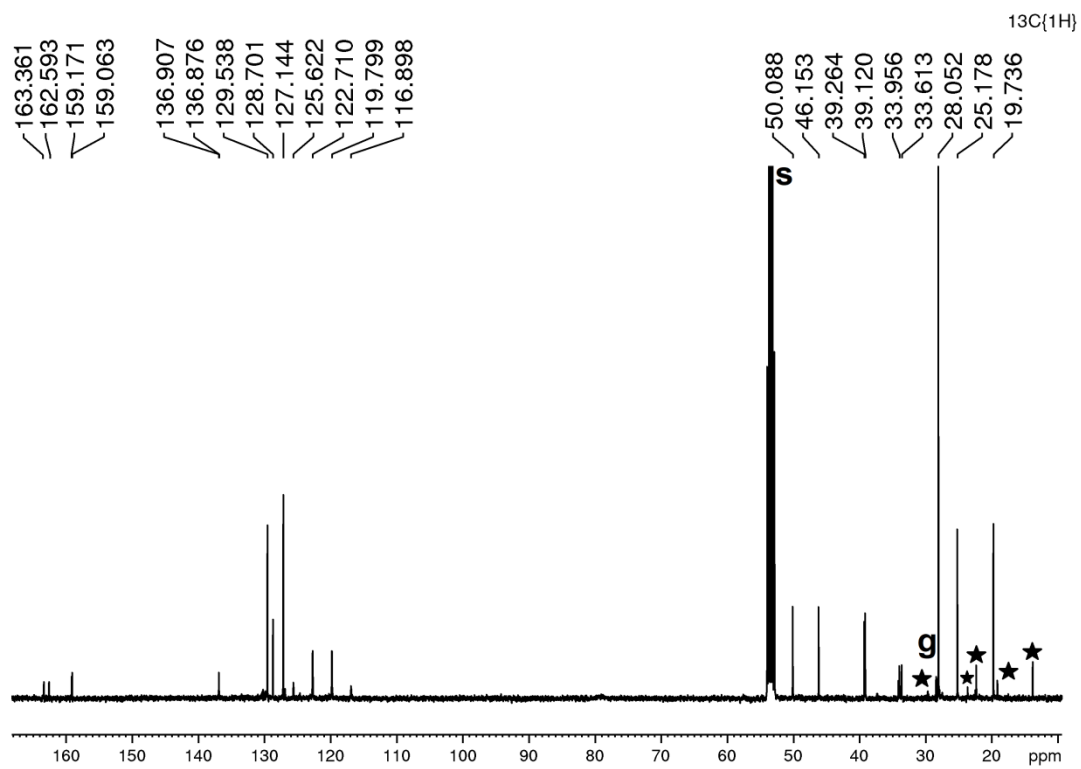

Figure S34. <sup>13</sup>C{<sup>1</sup>H} spectrum (CD<sub>2</sub>Cl<sub>2</sub>) of 6



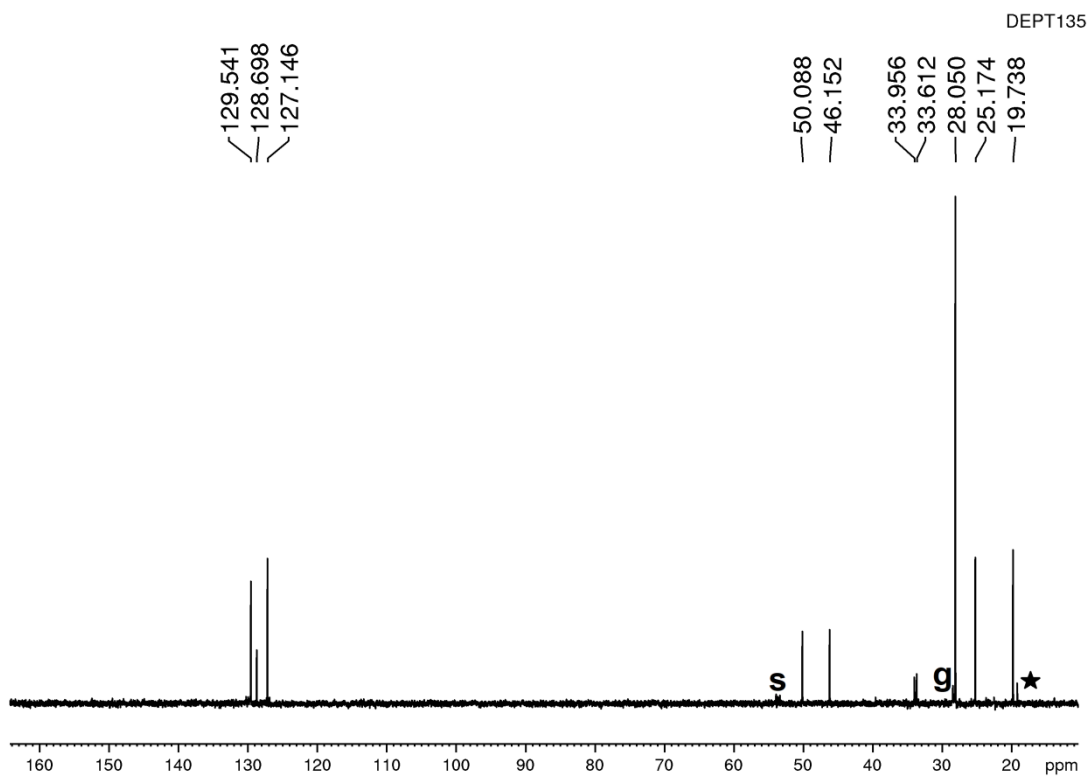

Figure S35.  $^{135}\text{DEPT}$  spectrum ( $\text{CD}_2\text{Cl}_2$ ) of **6**

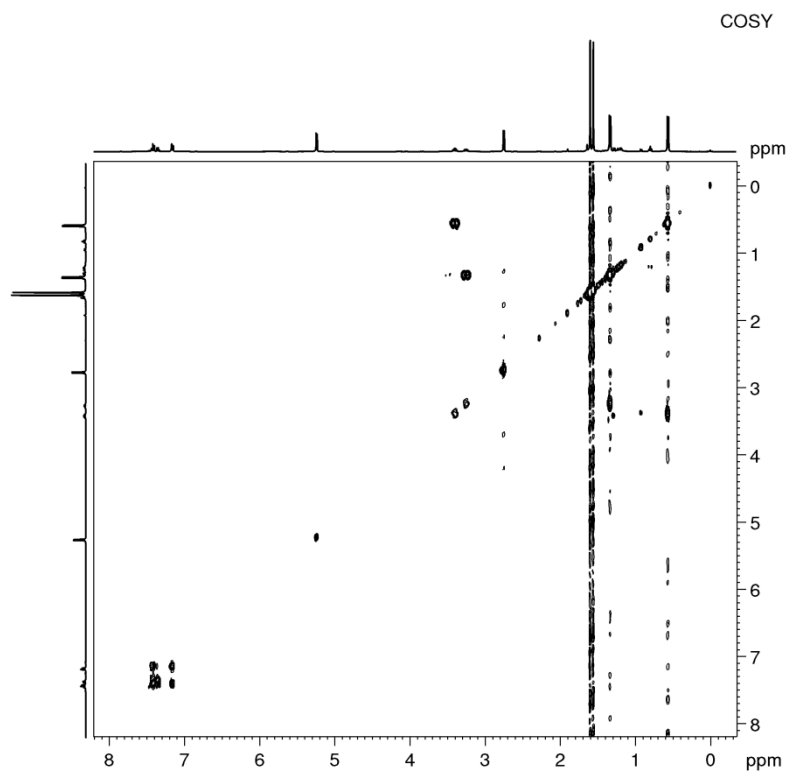

Figure S36. COSY spectrum ( $\text{CD}_2\text{Cl}_2$ ) of **6**

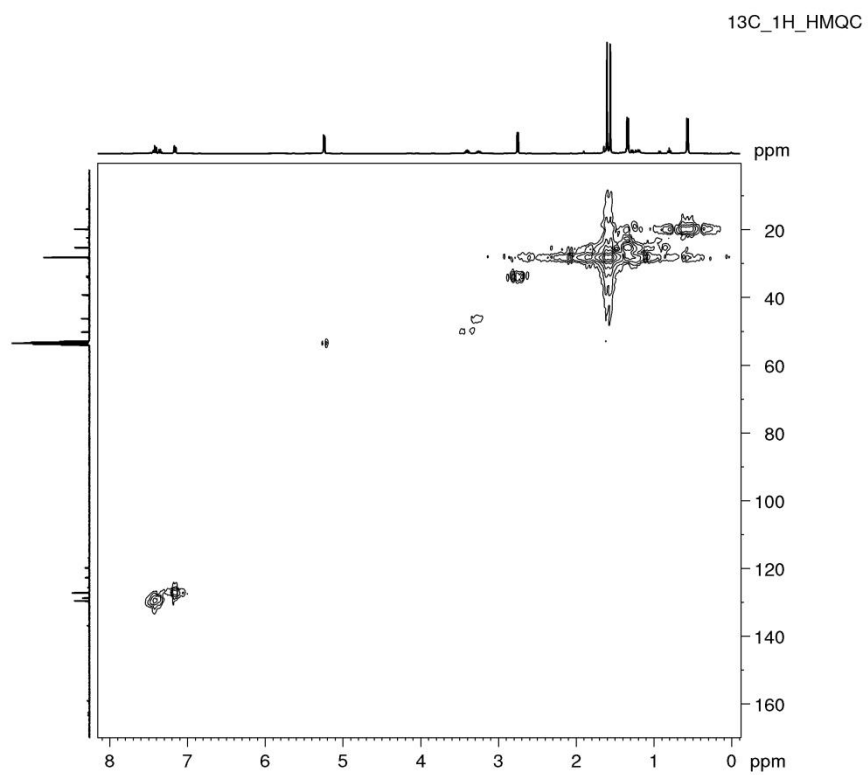

**Figure S37.**  $^{13}\text{C}$   $^1\text{H}$  HMQC spectrum ( $\text{CD}_2\text{Cl}_2$ ) of **6**

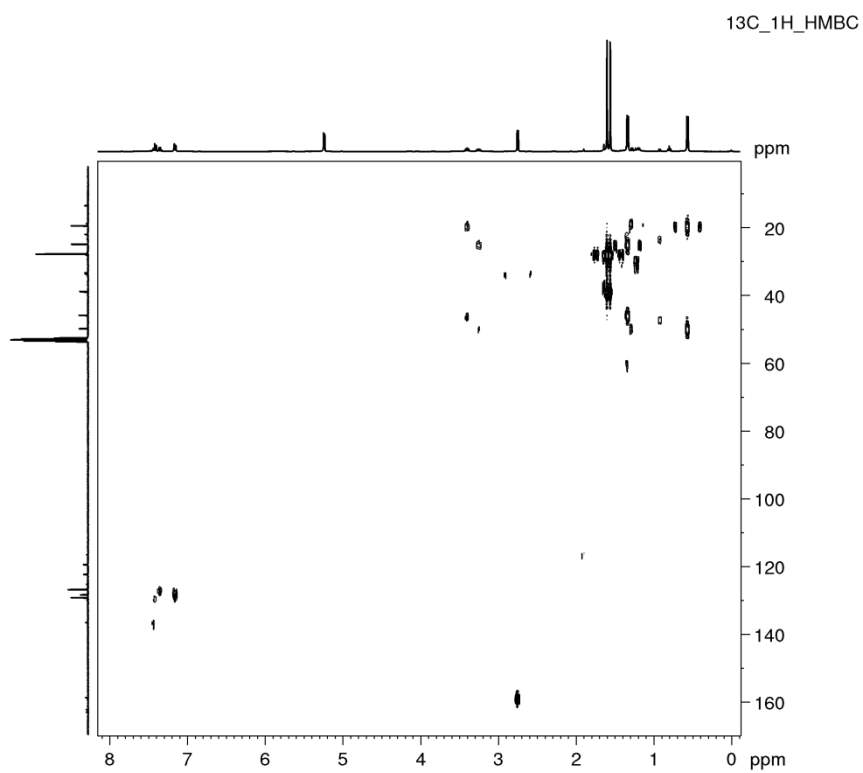

**Figure S38.**  $^{13}\text{C}$   $^1\text{H}$  HMBC spectrum ( $\text{CD}_2\text{Cl}_2$ ) of **6**

<sup>27</sup>Al

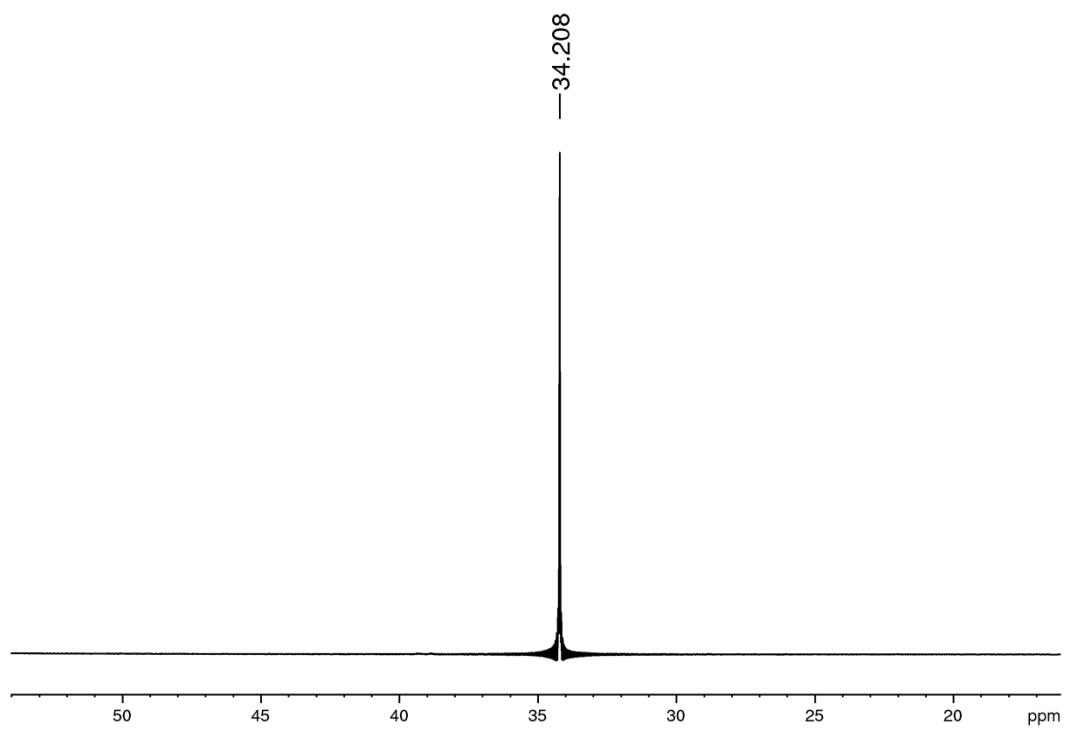

Figure S39. <sup>27</sup>Al spectrum (CD<sub>2</sub>Cl<sub>2</sub>) of **6**

<sup>19</sup>F{<sup>1</sup>H}

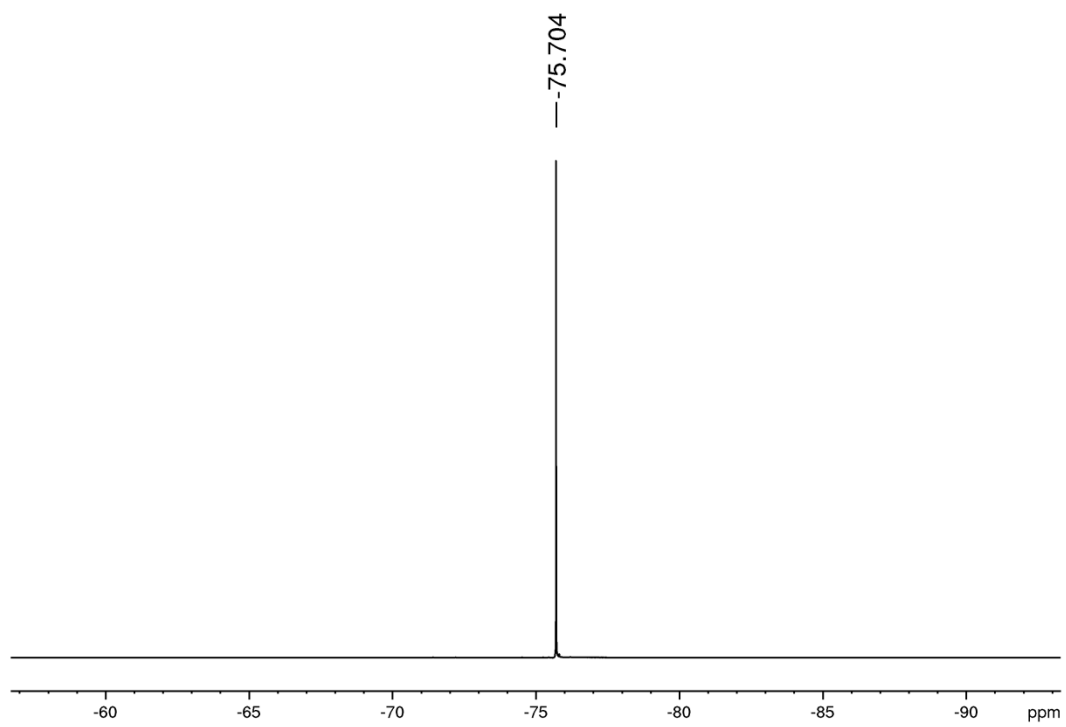

Figure S40. <sup>19</sup>F{<sup>1</sup>H} spectrum (CD<sub>2</sub>Cl<sub>2</sub>) of **6**

# Reaction of **1** with Li[Al(OC(CF<sub>3</sub>)<sub>3</sub>)<sub>4</sub>] – monitoring of reaction progress by <sup>11</sup>B and <sup>31</sup>P{<sup>1</sup>H} NMR

Progress of the reaction between **1** (0.084 g, 0.25 mmol) and Li[Al(OC(CF<sub>3</sub>)<sub>3</sub>)<sub>4</sub>] (0.244 g, 0.250 mmol) mixed at -50 °C in CD<sub>2</sub>Cl<sub>2</sub> was monitored by <sup>11</sup>B and <sup>31</sup>P{<sup>1</sup>H} NMR. Spectra were recorded at -25 °C, 0 °C, 25 °C, and at 25 °C after 30 and 60 minutes.

**Table S1.** <sup>11</sup>B and <sup>31</sup>P{<sup>1</sup>H} NMR shifts for **1**, and probable assignments of <sup>11</sup>B and <sup>31</sup>P{<sup>1</sup>H} NMR signals for **2** and **7**

|                                                                         | <b>1</b>                                                                          | <b>2</b>                                                                           | <b>7</b>                                                                            |                                                                                     |
|-------------------------------------------------------------------------|-----------------------------------------------------------------------------------|------------------------------------------------------------------------------------|-------------------------------------------------------------------------------------|-------------------------------------------------------------------------------------|
|                                                                         |                                                                                   |                                                                                    | <b>7-Br</b>                                                                         | <b>7-Cl</b>                                                                         |
|                                                                         | 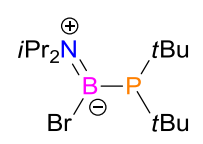 |  |  |  |
| <sup>11</sup> B NMR (CD <sub>2</sub> Cl <sub>2</sub> )                  | δ 38.2 (s)                                                                        | δ 67.5 (bs)                                                                        | δ 27.3 (d, <sup>1</sup> J <sub>BP</sub> = 154.5 Hz)                                 | δ 29.9 (d, <sup>1</sup> J <sub>BP</sub> = 162.2 Hz)                                 |
| <sup>31</sup> P{ <sup>1</sup> H} NMR (CD <sub>2</sub> Cl <sub>2</sub> ) | δ -10.9 (s)                                                                       | δ 51.5 (bs)                                                                        | δ 12.2 (m)                                                                          | δ 12.2 (m)                                                                          |

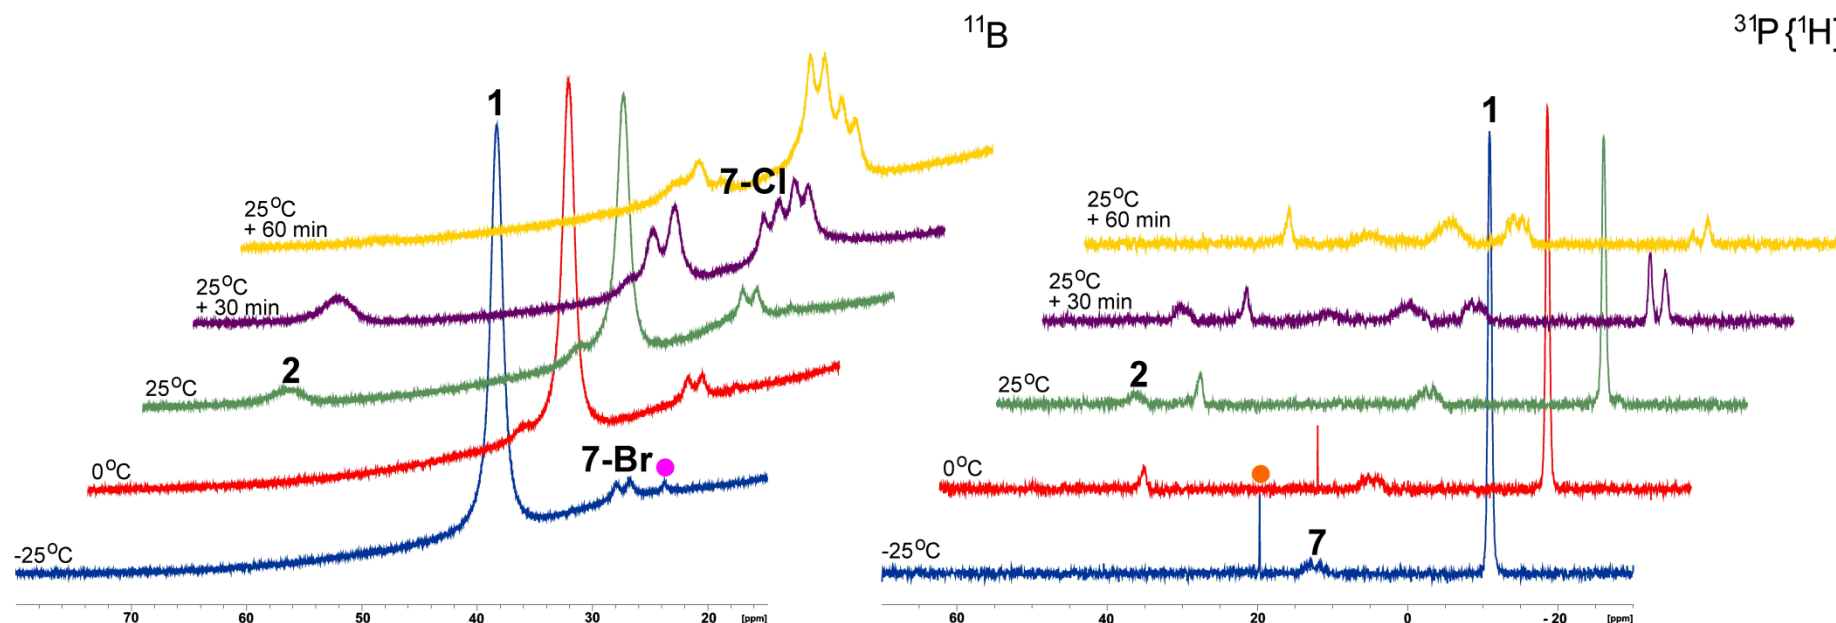

**Figure S41.** Monitoring of reaction progress by <sup>11</sup>B and <sup>31</sup>P{<sup>1</sup>H} NMR. Reaction of **1** with Li[Al(OC(CF<sub>3</sub>)<sub>3</sub>)<sub>4</sub>]

## X-ray structure analysis

Generally all structures exhibit high degree of disorder which is located mainly in the aluminate anion. The  $[\text{Al}(\text{OC}(\text{CF}_3)_3)_4]^-$  anion has many modes of deformation which makes it difficult to model. We found useful a model in which trifluoromethyl tetrahedral groups are arranged with horizontal C-F bond going in clockwise or anticlockwise direction in both parts. Sometimes also tilting on O-atom of the whole alkoxy group must have been taken into account. Without any disorder model at the flexible anions,  $R_1$  indices rise well above 20%.

### X-ray structure analysis details

Diffraction intensity data for all crystals were collected on an IPDS 2T dual beam diffractometer (STOE & Cie GmbH, Darmstadt, Germany) at 120.0(2) K with Mo  $K\alpha$  radiation of a microfocus X-ray source (GeniX 3D Mo High Flux, Xenocs, Sassenage, 50 kV, 1.0 mA, and  $\lambda = 0.71069 \text{ \AA}$ ). Investigated crystals were thermostated under a nitrogen stream at 120 K using the CryoStream-800 device (Oxford CryoSystem, UK) during the entire experiment. Data collection and data reduction were controlled by using the X-Area 1.75 program (STOE, 2015). Absorption correction was not performed because data absorption coefficient  $< 0.5 \text{ mm}^{-1}$ , for all data. The structures were solved using intrinsic phasing implemented in SHELXT and refined anisotropically using the program packages Olex2<sup>3</sup> and SHELX-2015.<sup>4,5</sup> Positions of hydrogen atoms were calculated geometrically taking into account isotropic temperature factors. All H-atoms were refined as riding on their parent atoms with the usual restraints.

Structure **3** contains two cations and two anions in the asymmetric unit ( $Z' = 2$ ). Both symmetry independent cations are fully ordered. Anions turned out to be substantially disordered. Disorder of the anion with Al1 was modelled with  $\text{CF}_3$  groups running clockwise and anticlockwise at pivot atom O2 in both parts (with site occupation factors of 0.849(5)/0.151(5)). Anion containing Al2 atom was modelled as disordered in all alkoxy branches at O7, O8, O9 and O10. Only O8 atom was left in one position and related  $\text{CF}_3$  groups running in opposite directions with s.o.f. of 0.656(4)/0.344(4). The other groups were modelled as disordered over two positions with the following occupation factors: 0.781(8)/0.219(8) at O7, 0.778(9)/ 0.222(9) at O9 and 0.716(5)/ 0.284(5) at O10. Several restraints were necessary to make refinement stable.

Structure **4** contained one cation and one anion in the asymmetric unit. The cation position was well defined and the anion was again disordered, but less than in other structures. We applied disorder model of  $\text{CF}_3$  running in opposite directions for alkoxy groups hanging at O1 and O3. Terminal  $\text{CF}_3$  groups bound to C22-O1 were refined as disordered over two positions with occupation

factors of 0.702(5)/0.298(5). Groups attached at C30-O3 were refined to s.o.f. of 0.695(6)/0.305(6). Several restraints were applied to bond lengths in these parts to get stable refinement.

Structure **5** contains one positive and one negative ion in the asymmetric unit. The anion is again strongly disordered. Two perfluoro *t*-butoxy groups OC<sub>4</sub>F<sub>9</sub> containing O2 and O3 were refined as disordered over two positions, with occupation factors of 0.702(7)/0.298(7) and 0.775(5)/0.225(5), respectively. Terminal CF<sub>3</sub> groups bound to C31-O4 were refined as disordered over two positions with occupation factors of 0.692(7)/0.308(7). Several restraints were applied to C-F and F-F distances in order to get stable refinement. The cation is placed in the well-defined position with relatively small displacement ellipsoids for all atoms.

Asymmetric unit of structure **6** contains one cation, one anion and a solvent molecule of dichloromethane (perhaps not fully occupied). The solvent was strongly disordered and was cut out using the solvent mask (squeeze) procedure.<sup>3</sup> Program finds four voids of volume ca. 152Å<sup>3</sup>, containing 40.6 electron charge, each. Exceptionally, one finds some disorder also in the cation in structure **6**. One *tert*-butyl group C16-C19 was refined as disordered over two positions with s.o.f. of 0.68(3)/0.32(3). Disorder of the anion was more demanding. We found best results with a model where two perfluoro *t*-butoxy groups OC<sub>4</sub>F<sub>9</sub> containing O3 and O5 were disordered over three positions with occupation factors of 0.666(3) / 0.127(3) / 0.207(3) and 0.418(3) / 0.290(3) / 0.292(3), respectively. Naturally, many restraints were applied to C-F, C-C and F-F distances in order to get stable, meaningful refinement.

Crystallographic data for all structures reported in this paper have been deposited with the Cambridge Crystallographic Data Centre as supplementary publication Nos. **CCDC 2240178 – 2240181**. The data can be obtained free of charge from The Cambridge Crystallographic Data Centre via [www.ccdc.cam.ac.uk/structures](http://www.ccdc.cam.ac.uk/structures).

**Table S2.** Crystal data and structure refinement for **3**, **4**, **5**, and **6**

|                                                                            | <b>3</b>                                         | <b>4</b>                                        | <b>5</b>                                        | <b>6</b>                                         |
|----------------------------------------------------------------------------|--------------------------------------------------|-------------------------------------------------|-------------------------------------------------|--------------------------------------------------|
| CCDC deposition No                                                         | 2240178                                          | 2240179                                         | 2240180                                         | 2240181                                          |
| Chemical formula                                                           | $C_{16}AlF_{36}O_4^- \cdot C_{21}H_{37}BN_2OP^+$ | $C_{16}AlF_{36}O_4^- \cdot C_{21}H_{46}BN_3P^+$ | $C_{16}AlF_{36}O_4^- \cdot C_{18}H_{38}BN_3P^+$ | $C_{16}AlF_{36}O_4^- \cdot C_{23}H_{40}BN_3OP^+$ |
| $M_r$ [g·mol <sup>-1</sup> ]                                               | 1342.44                                          | 1349.53                                         | 1305.43                                         | 1383.50                                          |
| Crystal system                                                             | Monoclinic                                       | Monoclinic                                      | Monoclinic                                      | Monoclinic                                       |
| Space group                                                                | $P2_1/n$                                         | $P2_1/c$                                        | $P2_1/n$                                        | $P2_1/c$                                         |
| Temperature [K]                                                            | 120                                              | 120                                             | 120                                             | 120                                              |
| $a$ [Å]                                                                    | 17.0561(3)                                       | 10.5987(11)                                     | 18.6108(4)                                      | 14.2923(11)                                      |
| $b$ [Å]                                                                    | 40.9364(7)                                       | 16.314(3)                                       | 14.3902(4)                                      | 27.525(3)                                        |
| $c$ [Å]                                                                    | 17.3489(3)                                       | 32.120(3)                                       | 20.5231(4)                                      | 14.8101(11)                                      |
| $\alpha$ [°]                                                               | 90                                               | 90                                              | 90                                              | 90                                               |
| $\beta$ [°]                                                                | 118.929(1)                                       | 98.263(1)                                       | 113.982(1)                                      | 94.220(6)                                        |
| $\gamma$ [°]                                                               | 90                                               | 90                                              | 90                                              | 90                                               |
| $V$ [Å <sup>3</sup> ]                                                      | 10601.8(3)                                       | 5496.1(13)                                      | 5021.9(2)                                       | 5810.3(8)                                        |
| $Z$                                                                        | 8                                                | 4                                               | 4                                               | 4                                                |
| Radiation type                                                             | Mo $K\alpha$                                     | Mo $K\alpha$                                    | Mo $K\alpha$                                    | Mo $K\alpha$                                     |
| $\lambda$ [Å]                                                              | 0.71073                                          | 0.71073                                         | 0.71073                                         | 0.71073                                          |
| Calculated density [g·cm <sup>-3</sup> ]                                   | 1.682                                            | 1.631                                           | 1.727                                           | 1.582                                            |
| $\mu$ [mm <sup>-1</sup> ]                                                  | 0.24                                             | 0.23                                            | 0.25                                            | 0.22                                             |
| Crystal size [mm]                                                          | 0.24 × 0.15 × 0.13                               | 0.37 × 0.11 × 0.09                              | 0.37 × 0.31 × 0.27                              | 0.43 × 0.14 × 0.07                               |
| $F(000)$                                                                   | 5360                                             | 2712                                            | 2608                                            | 2768                                             |
| $R_{int}$                                                                  | 0.028                                            | 0.046                                           | 0.032                                           | 0.043                                            |
| No. of measured, independent and observed [ $I > 2\sigma(I)$ ] reflections | 54894<br>21431<br>16051                          | 45571<br>10771<br>8023                          | 49002<br>9860<br>8240                           | 50956<br>10678<br>8106                           |
| $R[F^2 > 2\sigma(F^2)]$                                                    | 0.072                                            | 0.083                                           | 0.098                                           | 0.098                                            |
| $wR(F^2)$                                                                  | 0.179                                            | 0.203                                           | 0.269                                           | 0.264                                            |
| $S$                                                                        | 1.06                                             | 1.10                                            | 1.02                                            | 1.02                                             |
| No. of reflections                                                         | 21431                                            | 10771                                           | 9860                                            | 10678                                            |
| No. of parameters                                                          | 1788                                             | 875                                             | 915                                             | 1009                                             |
| No. of restraints                                                          | 88                                               | 75                                              | 114                                             | 358                                              |
| $\Delta_{max}$ [e·Å <sup>-3</sup> ]                                        | 0.68                                             | 0.89                                            | 1.08                                            | 1.20                                             |
| $\Delta_{min}$ [e·Å <sup>-3</sup> ]                                        | -0.58                                            | -0.66                                           | -0.69                                           | -0.90                                            |

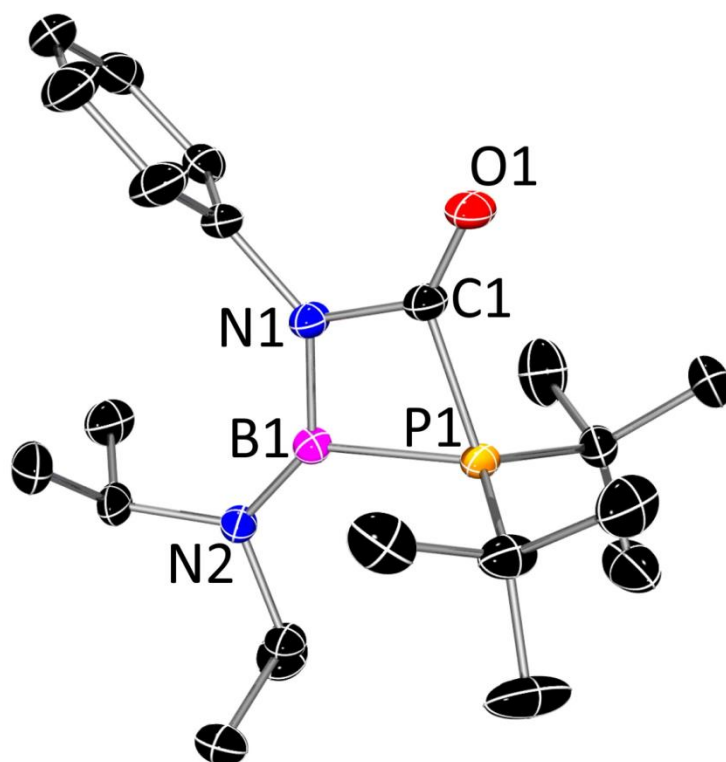

**Figure S42.** Molecular structure of  $3^+$ . The counterion and hydrogen atoms are omitted for clarity. The thermal ellipsoids are shown at the 40% probability level. Important bond distances [Å]: B1 – P1 1.964(4); B1 – N1 1.472(4); B1 – N2 1.371(4); P1 – C1 1.872(3); C1 – O1 1.194(4); C1 – N1 1.398 (4). Important angles [°]: N1 – B1 – N2 139.1(3); N2 – B1 – P1 132.2(3); P1 – B1 – N1 88.6(2); C1 – P1 – B1 72.40(15); B1 – P1 – C14 116.32(18); C14 – P1 – C18 120.7(2); C18 – P1 – C1 109.91(17); C1 – P1 – C14 109.91(17); C18 – P1 – B1 117.70(18); B1 – N1 – C1 104.3(3); C1 – N1 – C2 119.4(3); C2 – N1 – B1 136.3(3); B1 – N2 – C8 126.9(3); C8 – N2 – C11 114.3(3); C11 – N2 – B1 118.8(3); O1 – C1 – P1 135.4(3); P1 – C1 – N1 94.7(2); N1 – C1 – O1 129.9(3).

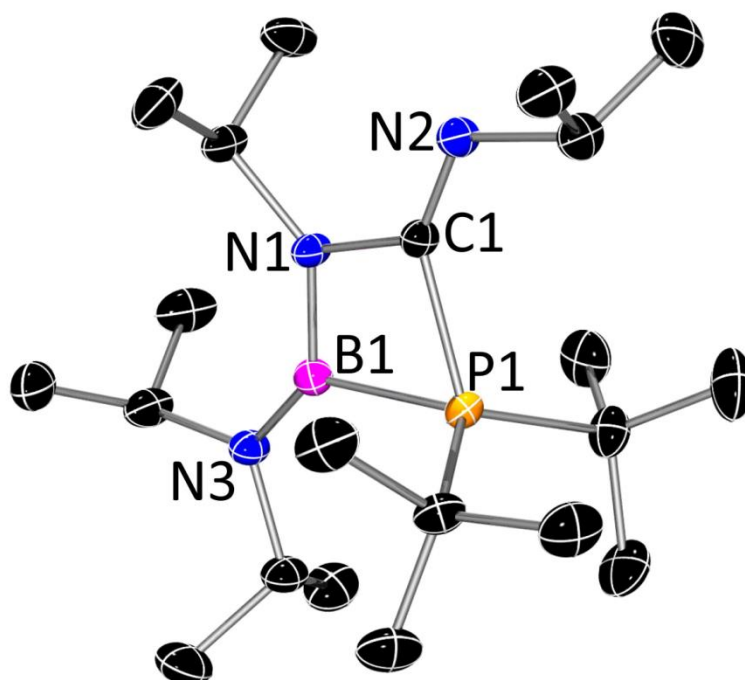

**Figure S43.** Molecular structure of  $4^+$ . The counterion and hydrogen atoms are omitted for clarity. The thermal ellipsoids are shown at the 40% probability level. Important bond distances [Å]: B1 – P1 1.963(5); B1 – N1 1.450(6); B1 – N3 1.382(6); P1 – C1 1.871(4); C1 – N1 1.411(5); C1 – N2 1.249(5). Important angles [°]: N1 – B1 – N3 138.7(4); N3 – B1 – P1 132.6(3); P1 – B1 – N1 88.7(3); C1 – P1 – B1 72.57(19); B1 – P1 – C14 115.1(2); C14 – P1 – C18 118.3(2); C18 – P1 – C1 113.9(2); C1 – P1 – C14 111.81(19); C18 – P1 – B1 116.6(2); B1 – N1 – C1 105.0(3); C1 – N1 – C2 120.1(3); C2 – N1 – B1 134.8(3); C1 – N2 – C5 121.0(4); B1 – N3 – C8 126.4(4); C8 – N3 – C11 113.5(3); C11 – N3 – B1 120.0(4); N1 – C1 – P1 93.6(3); P1 – C1 – N2 139.7(3); N2 – C1 – N1 126.7(4).



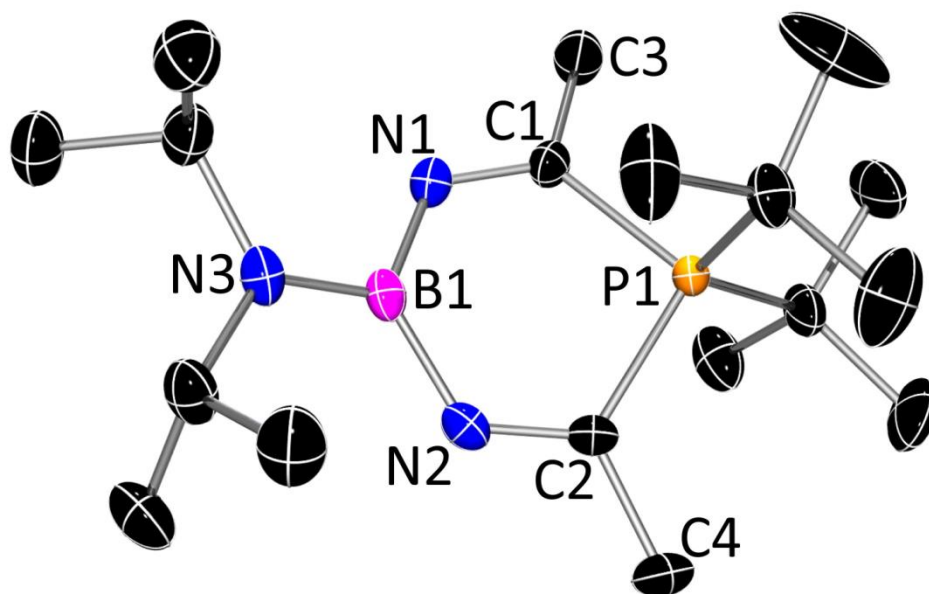

**Figure S44.** Molecular structure of  $5^+$ . The counterion and hydrogen atoms are omitted for clarity. The thermal ellipsoids are shown at the 40% probability level. Important bond distances [Å]: B1 – N1 1.483(6); B1 – N2 1.466(6); B1 – N3 1.387(6); P1 – C1 1.873(4); P1 – C2 1.879(4); C1 – C3 1.509(6); C1 – N1 1.261(5); C2 – C4 1.502(6); C2 – N2 1.259(5). Important angles [°]: N1 – B1 – N2 120.1(3); N2 – B1 – N3 121.8(4); N3 – B1 – N1 118.1(4); C1 – P1 – C2 100.57(18); C2 – P1 – C11 111.2(2); C11 – P1 – C1 111.6(2); C11 – P1 – C15 117.3(2); C15 – P1 – C1 107.06(19); C2 – P1 – C15 107.7(2); B1 – N1 – C1 125.2(3); B1 – N2 – C2 124.6(3); B1 – N3 – C5 121.2(4); C5 – N3 – C8 114.8(3); C8 – N3 – B1 123.9(4); N1 – C1 – P1 118.7(3); P1 – C1 – C3 120.0(3); C3 – C1 – N1 121.3(4); N2 – C2 – P1 119.5(3); P1 – C2 – C4 120.4(3); C4 – C2 – N2 120.1(4).

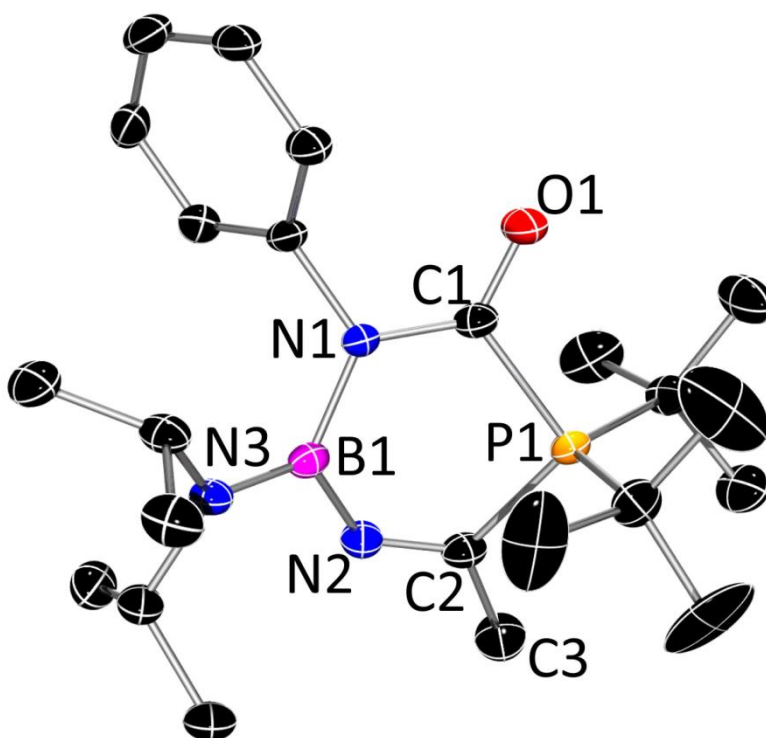

**Figure S45.** Molecular structure of  $6^+$ . The counterion and hydrogen atoms are omitted for clarity. The thermal ellipsoids are shown at the 40% probability level. Important bond distances [Å]: B1 – N1 1.494(6); B1 – N2 1.460(6); B1 – N3 1.375(7); P1 – C1 1.873(4); P1 – C2 1.870(5); C1 – O1 1.215(6); C1 – N1 1.356(6); C2 – C3 1.505(6); C2 – N2 1.258(6). Important angles [°]: N1 – B1 – N2 117.0(4); N2 – B1 – N3 119.6(4); N3 – B1 – N1 123.4(4); C1 – P1 – C2 102.2(2); C2 – P1 – C16 110.4(2); C16 – P1 – C1 105.8(2); C16 – P1 – C20 117.8(2); C20 – P1 – C1 105.9(2); C2 – P1 – C20 113.1(2); B1 – N1 – C1 122.6(4); C1 – N1 – C4 115.4(3); C4 – N1 – B1 121.6(4); B1 – N2 – C2 129.5(4); B1 – N3 – C10 123.4(4); C10 – N3 – C13 114.0(4); C13 – N3 – B1 122.5(4); O1 – C1 – P1 115.6(4); P1 – C1 – N1 118.0(3); N1 – C1 – O1 126.3(4); N2 – C2 – P1 116.3(3); P1 – C2 – C3 121.1(4); C3 – C2 – N2 122.6(4).

# DFT calculations

## General methods

The stationary point structures (energy minima and first-order saddle points) of all systems investigated in this work were calculated using density functional theory (DFT) method, especially  $\omega$ B97xD<sup>6</sup> hybrid functional with the 6-311++G(d,p)<sup>7</sup> Pople's basis set of triple-zeta quality. The corresponding harmonic frequencies were computed at the same level of theory to characterize the nature of stationary points. The Gibbs free energies of resulted structures were estimated using  $\omega$ B97xD/6-311++G(d,p) electronic energies, zero-point energy corrections, thermal corrections and entropy contributions at  $T = 298.15$  K. The effects of surrounding solvent molecules (dichloromethane) were obtained using the polarizable continuum model (the integral equation formalism variant: IEFPCM).<sup>8</sup> Natural Bond Orbital and Natural Resonance Theory computations were performed with the NBO 7.0 module.<sup>9</sup> All calculations were completed with Gaussian16 (Rev.C.01) software,<sup>10</sup> excluding NBO and NRT analyzes for which Gaussian 09 (Rev.D.01) program package was used.<sup>11</sup>

## Structures

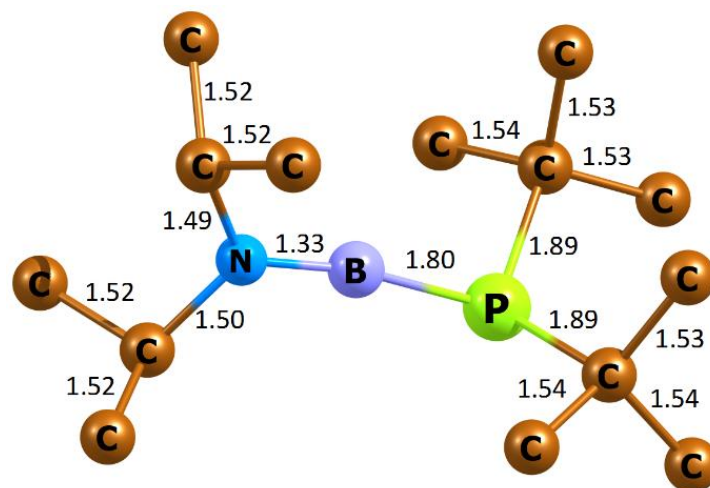

**Figure S46.** The  $\omega$ B97xD/6-311++G(d,p) equilibrium geometry of the  $2^+$  system. The hydrogen atoms are omitted for clarity. The bond lengths are given in Å.

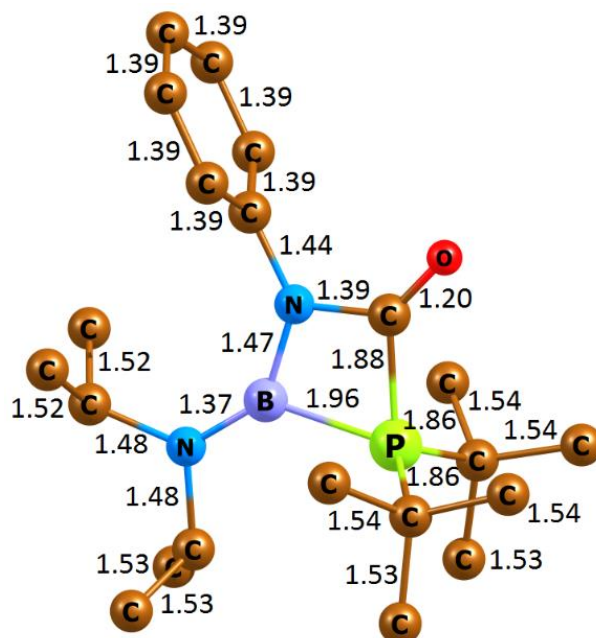

**Figure S47.** The  $\omega$ B97xD/6-311++G(d,p) equilibrium geometry of the  $3^+$  system. The hydrogen atoms are omitted for clarity. The bond lengths are given in Å.

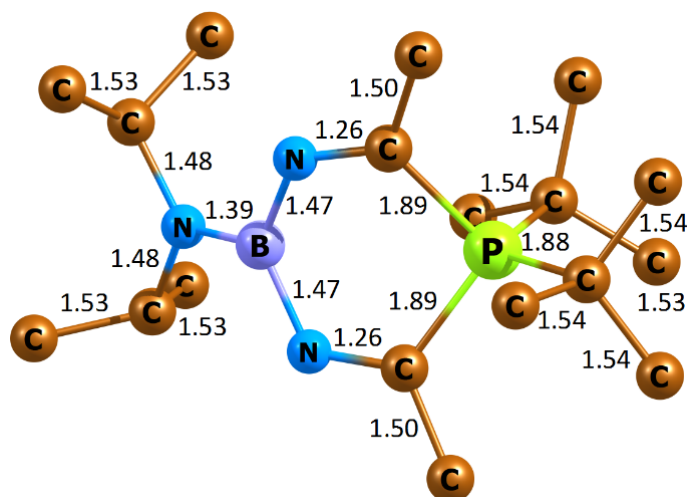

**Figure S48.** The  $\omega$ B97xD/6-311++G(d,p) equilibrium geometry of the  $5^+$  system. The hydrogen atoms are omitted for clarity. The bond lengths are given in Å.

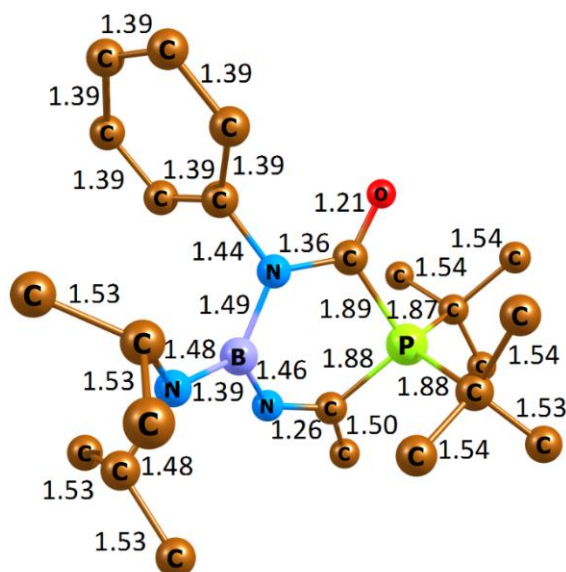

**Figure S49.** The  $\omega$ B97xD/6-311++G(d,p) equilibrium geometry of the  $6^+$  system. The hydrogen atoms are omitted for clarity. The bond lengths are given in Å.

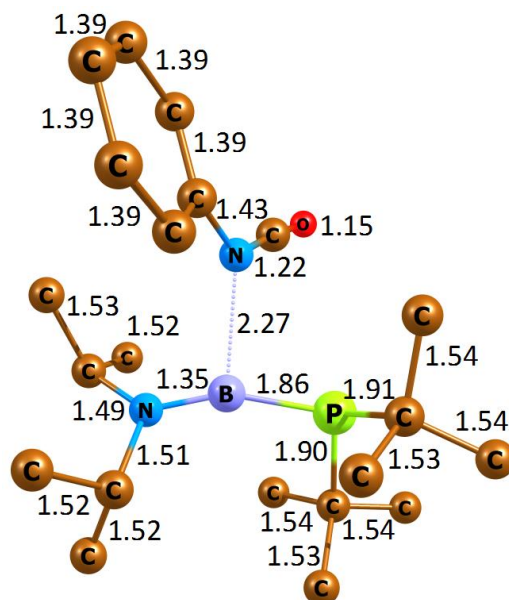

**Figure S50.** The  $\omega$ B97xD/6-311++G(d,p) transition state structure (TS) found for the reaction of  $2^+$  with PhNCO. The hydrogen atoms are omitted for clarity. Selected interatomic distances are given in Å.

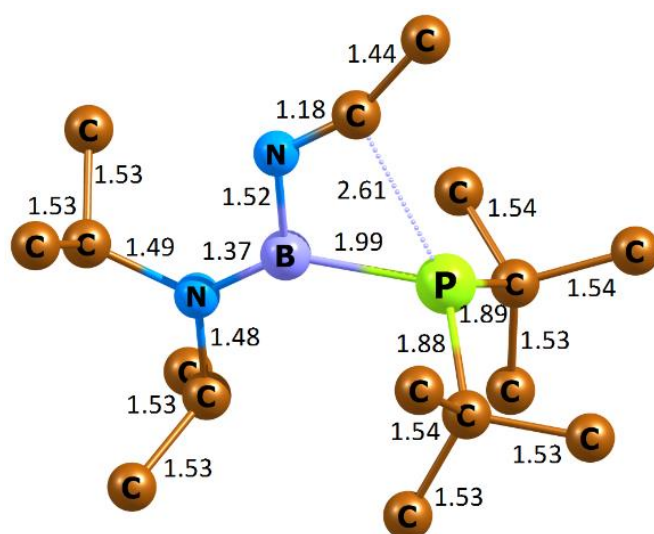

**Figure S51.** The  $\omega$ B97xD/6-311++G(d,p) transition state structure (TS1) found for the reaction of  $2^+$  with 2 equiv of MeCN. The hydrogen atoms are omitted for clarity. Selected interatomic distances are given in Å.

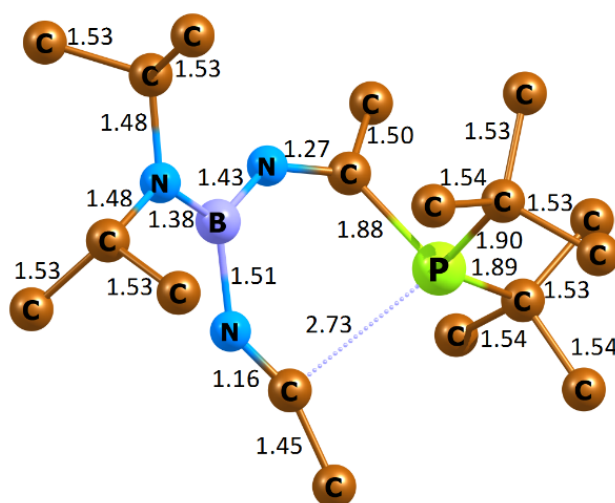

**Figure S52.** The  $\omega$ B97xD/6-311++G(d,p) transition state structure (TS2) found for the reaction of  $2^+$  with 2 equiv of MeCN. The hydrogen atoms are omitted for clarity. Selected interatomic distances are given in Å.

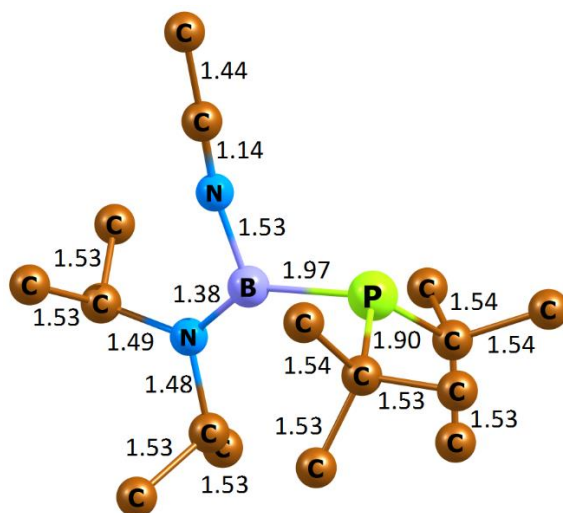

**Figure S53.** The  $\omega$ B97xD/6-311++G(d,p) intermediate product (IP1) found for the reaction of  $2^+$  with 2 equiv of MeCN. The hydrogen atoms are omitted for clarity. Selected interatomic distances are given in Å.

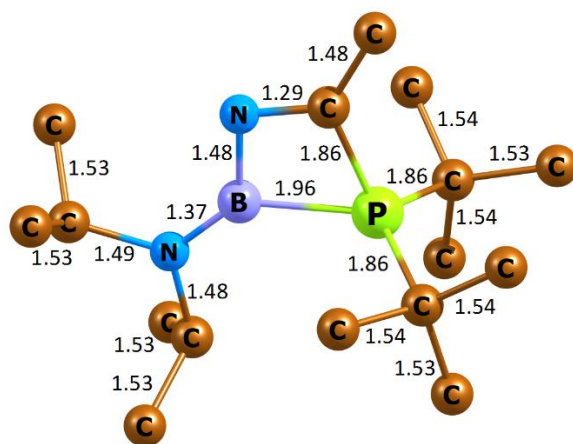

**Figure S54.** The  $\omega$ B97xD/6-311++G(d,p) intermediate product (IP2) found for the reaction of  $2^+$  with 2 equiv of MeCN. The hydrogen atoms are omitted for clarity. Selected interatomic distances are given in Å.

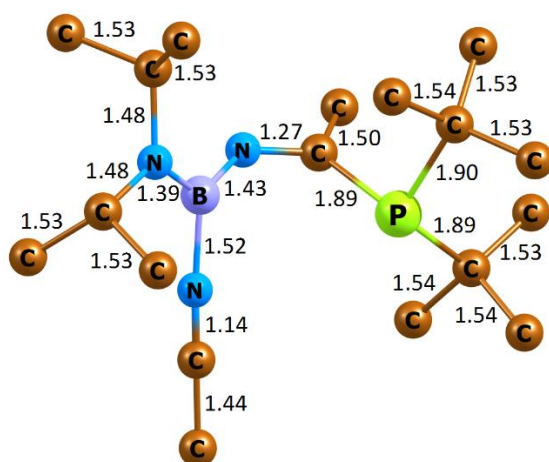

**Figure S55.** The  $\omega$ B97xD/6-311++G(d,p) intermediate product (IP3) found for the reaction of  $2^+$  with 2 equiv of MeCN. The hydrogen atoms are omitted for clarity. Selected interatomic distances are given in Å.

## Cartesian coordinates

The Cartesian coordinates of all systems investigated in this contribution.

**2<sup>+</sup>**

|   |              |              |              |
|---|--------------|--------------|--------------|
| P | 1.177055000  | -0.045296000 | -0.643774000 |
| N | -1.873979000 | -0.060724000 | -0.059105000 |
| C | -2.658498000 | -0.305970000 | -1.315600000 |
| H | -1.915879000 | -0.340142000 | -2.117400000 |
| B | -0.549649000 | -0.041777000 | -0.148416000 |
| C | -2.605663000 | 0.125245000  | 1.229697000  |
| H | -3.631540000 | -0.188691000 | 1.034474000  |
| C | 2.006802000  | -1.587810000 | 0.057486000  |
| C | -2.605250000 | 1.595924000  | 1.631472000  |
| H | -1.591877000 | 1.933452000  | 1.866408000  |
| H | -3.222382000 | 1.730448000  | 2.522077000  |
| H | -3.004794000 | 2.226652000  | 0.836346000  |
| C | 1.797033000  | 1.984832000  | 1.281110000  |
| H | 0.758271000  | 2.010937000  | 1.617875000  |
| H | 2.229287000  | 2.977580000  | 1.443022000  |
| H | 2.342142000  | 1.279227000  | 1.907237000  |
| C | -2.017471000 | -0.777988000 | 2.306203000  |
| H | -2.032615000 | -1.823088000 | 1.990656000  |
| H | -2.603739000 | -0.684584000 | 3.222079000  |
| H | -0.986563000 | -0.493023000 | 2.542081000  |
| C | 1.896591000  | 1.643592000  | -0.210062000 |
| C | -3.347709000 | -1.662948000 | -1.241299000 |
| H | -2.624059000 | -2.456025000 | -1.042826000 |
| H | -3.831833000 | -1.866837000 | -2.198308000 |
| H | -4.118738000 | -1.687533000 | -0.467456000 |
| C | -3.613312000 | 0.846301000  | -1.594633000 |
| H | -4.389550000 | 0.925236000  | -0.829723000 |
| H | -4.107305000 | 0.668500000  | -2.551865000 |
| H | -3.076925000 | 1.795172000  | -1.655237000 |
| C | 3.362640000  | 1.658588000  | -0.663212000 |
| H | 3.978880000  | 0.975834000  | -0.074026000 |
| H | 3.762004000  | 2.666885000  | -0.520235000 |
| H | 3.466012000  | 1.400371000  | -1.719932000 |
| C | 1.085502000  | 2.658118000  | -1.029944000 |
| H | 1.160756000  | 2.467906000  | -2.102839000 |
| H | 1.477669000  | 3.660045000  | -0.832072000 |
| H | 0.027204000  | 2.660484000  | -0.749723000 |
| C | 2.565182000  | -1.387436000 | 1.468446000  |
| H | 3.372797000  | -0.653164000 | 1.488923000  |
| H | 2.981958000  | -2.339125000 | 1.813497000  |
| H | 1.792571000  | -1.079715000 | 2.175550000  |
| C | 3.137499000  | -1.972013000 | -0.909957000 |
| H | 2.754414000  | -2.172444000 | -1.913259000 |
| H | 3.622379000  | -2.881008000 | -0.541693000 |
| H | 3.900292000  | -1.193748000 | -0.980376000 |
| C | 0.940878000  | -2.692555000 | 0.063246000  |
| H | 0.170058000  | -2.510274000 | 0.816971000  |
| H | 1.424505000  | -3.642708000 | 0.307543000  |
| H | 0.461529000  | -2.808506000 | -0.913070000 |

**3<sup>+</sup>**

|   |              |              |              |
|---|--------------|--------------|--------------|
| P | 1.463920000  | -0.700708000 | -0.004197000 |
| O | -0.311136000 | -2.926435000 | -0.134413000 |
| N | -0.965616000 | -0.677530000 | -0.039750000 |
| N | -0.184375000 | 1.871163000  | 0.033182000  |
| C | -0.089481000 | -1.751801000 | -0.079459000 |
| C | -2.381538000 | -0.912494000 | -0.023608000 |
| C | -3.032959000 | -1.044133000 | 1.195997000  |
| H | -2.472085000 | -0.945081000 | 2.118337000  |
| C | -4.399610000 | -1.293064000 | 1.213805000  |
| H | -4.915271000 | -1.389718000 | 2.161762000  |
| C | -5.100200000 | -1.420715000 | 0.018968000  |
| H | -6.166300000 | -1.614378000 | 0.035349000  |
| C | -4.433827000 | -1.308707000 | -1.196819000 |
| H | -4.976590000 | -1.418151000 | -2.128088000 |
| C | -3.067111000 | -1.059373000 | -1.222158000 |
| H | -2.534165000 | -0.974024000 | -2.162189000 |
| C | -1.440446000 | 2.660555000  | -0.030505000 |
| H | -1.129028000 | 3.705354000  | -0.030509000 |
| C | -2.187463000 | 2.421598000  | -1.338106000 |
| H | -1.525307000 | 2.578693000  | -2.192508000 |
| H | -3.023664000 | 3.120332000  | -1.415808000 |
| H | -2.594387000 | 1.411165000  | -1.391458000 |
| C | -2.306476000 | 2.456020000  | 1.207639000  |
| H | -2.715936000 | 1.446225000  | 1.251106000  |
| H | -3.146183000 | 3.154808000  | 1.185605000  |
| H | -1.729416000 | 2.639783000  | 2.116572000  |
| C | 1.059054000  | 2.679709000  | 0.101441000  |
| H | 1.880658000  | 1.962165000  | 0.147594000  |
| C | 1.263176000  | 3.513855000  | -1.160673000 |
| H | 1.240858000  | 2.883277000  | -2.052763000 |
| H | 2.235406000  | 4.009813000  | -1.115310000 |
| H | 0.501540000  | 4.289537000  | -1.270382000 |
| C | 1.123541000  | 3.512372000  | 1.378877000  |
| H | 0.356269000  | 4.290019000  | 1.402586000  |
| H | 2.095664000  | 4.006408000  | 1.441800000  |
| H | 0.999362000  | 2.880083000  | 2.261225000  |
| C | 2.378528000  | -0.840353000 | -1.621484000 |
| C | 1.336047000  | -0.513798000 | -2.706746000 |
| H | 0.509036000  | -1.228220000 | -2.716335000 |
| H | 1.831359000  | -0.572725000 | -3.679117000 |
| H | 0.927958000  | 0.495486000  | -2.602403000 |
| C | 2.896204000  | -2.273130000 | -1.813836000 |
| H | 3.706337000  | -2.514600000 | -1.125851000 |
| H | 3.290465000  | -2.356230000 | -2.830380000 |
| H | 2.103508000  | -3.015943000 | -1.699604000 |
| C | 3.531012000  | 0.170430000  | -1.689076000 |
| H | 3.198575000  | 1.198587000  | -1.527429000 |
| H | 3.964063000  | 0.120326000  | -2.691845000 |
| H | 4.326184000  | -0.058278000 | -0.979172000 |
| C | 2.308120000  | -0.993201000 | 1.630244000  |
| C | 2.961192000  | -2.382477000 | 1.650503000  |
| H | 2.266858000  | -3.169972000 | 1.348531000  |
| H | 3.278526000  | -2.591190000 | 2.675822000  |
| H | 3.848437000  | -2.429182000 | 1.018601000  |
| C | 1.192847000  | -0.927317000 | 2.689476000  |
| H | 0.657855000  | 0.026252000  | 2.676116000  |
| H | 1.657491000  | -1.030303000 | 3.673363000  |
| H | 0.471256000  | -1.740223000 | 2.578940000  |
| C | 3.347348000  | 0.102316000  | 1.903753000  |
| H | 4.149050000  | 0.113449000  | 1.164813000  |
| H | 3.801007000  | -0.101549000 | 2.877622000  |
| H | 2.898687000  | 1.096664000  | 1.954684000  |
| B | -0.087123000 | 0.502051000  | 0.011112000  |

## 5+

|   |              |              |              |
|---|--------------|--------------|--------------|
| P | 1.568326000  | 0.049771000  | -0.063024000 |
| N | -0.673155000 | 1.257589000  | -1.044740000 |
| N | -0.691977000 | -1.279250000 | -0.816633000 |
| N | -2.719621000 | 0.068496000  | -0.319535000 |
| C | 0.550802000  | 1.447328000  | -0.826711000 |
| C | 0.532785000  | -1.445380000 | -0.580573000 |
| C | 1.435950000  | 0.170053000  | 1.810961000  |
| C | 0.033810000  | 0.691361000  | 2.161042000  |
| H | -0.135918000 | 1.709056000  | 1.804745000  |
| H | -0.053268000 | 0.699260000  | 3.250687000  |
| H | -0.759650000 | 0.045632000  | 1.779344000  |
| C | 2.492851000  | 1.131004000  | 2.369427000  |
| H | 3.504301000  | 0.735855000  | 2.268326000  |
| H | 2.296867000  | 1.254764000  | 3.437872000  |
| H | 2.446751000  | 2.121238000  | 1.911075000  |
| C | 1.614236000  | -1.226987000 | 2.425511000  |
| H | 0.794342000  | -1.895503000 | 2.154480000  |
| H | 1.601743000  | -1.117316000 | 3.513004000  |
| H | 2.561654000  | -1.695336000 | 2.155177000  |
| C | 3.296994000  | -0.038661000 | -0.790264000 |
| C | 4.096446000  | 1.265296000  | -0.611158000 |
| H | 3.688054000  | 2.094760000  | -1.182095000 |
| H | 5.101329000  | 1.074519000  | -0.997062000 |
| H | 4.201247000  | 1.568993000  | 0.428265000  |
| C | 4.096658000  | -1.174372000 | -0.129453000 |
| H | 4.323844000  | -0.953524000 | 0.914835000  |
| H | 5.049689000  | -1.257838000 | -0.658274000 |
| H | 3.609470000  | -2.145530000 | -0.185658000 |
| C | 3.117542000  | -0.295260000 | -2.297796000 |
| H | 2.633548000  | -1.246650000 | -2.518017000 |
| H | 4.109127000  | -0.316391000 | -2.756874000 |
| H | 2.547247000  | 0.499291000  | -2.785142000 |
| C | -3.402905000 | 1.368825000  | -0.165574000 |
| H | -2.681837000 | 2.119734000  | -0.487432000 |
| C | -3.747618000 | 1.655484000  | 1.296125000  |
| H | -4.484289000 | 0.950577000  | 1.691999000  |
| H | -4.170662000 | 2.659143000  | 1.384293000  |
| H | -2.853098000 | 1.604693000  | 1.921781000  |
| C | -4.620356000 | 1.478122000  | -1.083168000 |
| H | -4.336417000 | 1.288709000  | -2.120991000 |
| H | -5.036380000 | 2.486580000  | -1.018936000 |
| H | -5.413667000 | 0.777258000  | -0.808998000 |
| C | -3.521284000 | -1.122424000 | 0.044729000  |
| H | -4.499872000 | -0.742637000 | 0.342532000  |
| C | -3.750816000 | -2.045857000 | -1.150648000 |
| H | -4.186427000 | -1.488803000 | -1.983572000 |
| H | -4.444106000 | -2.843914000 | -0.871499000 |
| H | -2.814699000 | -2.497513000 | -1.481694000 |
| C | -2.954309000 | -1.858811000 | 1.258071000  |
| H | -1.994070000 | -2.324275000 | 1.026749000  |
| H | -3.647357000 | -2.644985000 | 1.568899000  |
| H | -2.821243000 | -1.173270000 | 2.099087000  |
| B | -1.391226000 | 0.011535000  | -0.726330000 |
| C | 1.210506000  | 2.760540000  | -1.125798000 |
| H | 1.827165000  | 3.103830000  | -0.292281000 |
| H | 0.429481000  | 3.492944000  | -1.326584000 |
| H | 1.848935000  | 2.681284000  | -2.009425000 |
| C | 1.161269000  | -2.807906000 | -0.655028000 |
| H | 1.921305000  | -2.865220000 | -1.435927000 |
| H | 0.372218000  | -3.525107000 | -0.878315000 |
| H | 1.633783000  | -3.080517000 | 0.290821000  |

## 6+

|   |              |              |              |
|---|--------------|--------------|--------------|
| P | 2.059250000  | 0.087554000  | -0.024819000 |
| O | 0.839193000  | 2.401997000  | 0.516968000  |
| N | -0.636276000 | 0.755321000  | -0.084556000 |
| N | 0.162941000  | -1.291172000 | -1.334400000 |
| N | -1.948600000 | -1.409415000 | -0.060919000 |
| C | 0.592232000  | 1.267785000  | 0.174702000  |
| C | -1.735307000 | 1.690983000  | -0.132052000 |
| C | -2.396712000 | 1.859872000  | -1.341655000 |
| H | -2.067193000 | 1.312313000  | -2.217836000 |
| C | -3.482426000 | 2.724868000  | -1.416044000 |
| H | -4.002017000 | 2.853154000  | -2.358211000 |
| C | -3.896810000 | 3.419344000  | -0.285938000 |
| H | -4.744761000 | 4.091796000  | -0.342599000 |
| C | -3.220378000 | 3.252581000  | 0.919016000  |
| H | -3.539015000 | 3.795051000  | 1.801318000  |
| C | -2.135709000 | 2.389731000  | 1.000104000  |
| H | -1.608663000 | 2.253268000  | 1.936941000  |
| C | 2.343887000  | -1.861555000 | -2.207608000 |
| H | 2.748329000  | -1.188487000 | -2.968269000 |
| H | 1.786232000  | -2.654784000 | -2.704606000 |
| H | 3.184035000  | -2.292520000 | -1.658323000 |
| C | 1.408243000  | -1.128490000 | -1.296686000 |
| C | -2.793604000 | -0.993888000 | 1.078862000  |
| H | -2.324867000 | -0.107234000 | 1.501817000  |
| C | -2.805117000 | -2.044181000 | 2.192377000  |
| H | -3.311685000 | -2.965050000 | 1.893238000  |
| H | -3.339032000 | -1.641338000 | 3.056173000  |
| H | -1.790540000 | -2.297315000 | 2.508155000  |
| C | -4.206954000 | -0.612200000 | 0.641881000  |
| H | -4.180858000 | 0.175284000  | -0.113192000 |
| H | -4.771036000 | -0.245144000 | 1.502679000  |
| H | -4.748559000 | -1.469230000 | 0.231900000  |
| C | -2.332594000 | -2.695949000 | -0.693876000 |
| H | -3.279169000 | -2.977350000 | -0.230220000 |
| C | -2.615603000 | -2.531124000 | -2.185806000 |
| H | -3.347911000 | -1.736074000 | -2.347335000 |
| H | -3.025134000 | -3.461660000 | -2.587462000 |
| H | -1.705575000 | -2.290085000 | -2.737340000 |
| C | -1.342656000 | -3.822956000 | -0.401020000 |
| H | -0.396187000 | -3.656760000 | -0.918475000 |
| H | -1.758239000 | -4.775168000 | -0.741453000 |
| H | -1.147176000 | -3.900599000 | 0.670901000  |
| C | 2.290875000  | -0.764710000 | 1.631757000  |
| H | 2.740001000  | 1.118776000  | 2.685843000  |
| C | 3.697787000  | -1.369861000 | 1.725540000  |
| H | 3.911306000  | -2.065544000 | 0.910770000  |
| H | 3.753547000  | -1.934476000 | 2.659769000  |
| H | 4.475417000  | -0.606430000 | 1.759376000  |
| C | 3.471570000  | 1.136483000  | -0.662233000 |
| C | 2.923696000  | 1.909218000  | -1.876580000 |
| H | 2.496146000  | 1.247284000  | -2.635268000 |
| H | 3.760072000  | 2.438171000  | -2.340368000 |
| H | 2.176110000  | 2.647711000  | -1.588506000 |
| C | 4.663446000  | 0.272165000  | -1.110597000 |
| H | 5.052371000  | -0.369818000 | -0.322213000 |
| H | 5.463476000  | 0.961859000  | -1.392066000 |
| H | 4.442825000  | -0.336239000 | -1.984759000 |
| C | 3.949512000  | 2.112219000  | 0.426544000  |
| H | 3.138859000  | 2.720929000  | 0.822734000  |
| H | 4.684302000  | 2.778476000  | -0.033675000 |
| H | 4.450973000  | 1.592579000  | 1.245097000  |
| B | -0.845810000 | -0.670446000 | -0.479540000 |
| C | 1.244751000  | -1.882252000 | 1.752718000  |
| H | 0.222282000  | -1.504315000 | 1.697402000  |
| H | 1.365235000  | -2.342477000 | 2.736761000  |
| H | 1.371442000  | -2.661728000 | 0.999271000  |
| C | 2.068719000  | 0.262651000  | 2.753163000  |
| H | 2.260149000  | -0.239264000 | 3.705176000  |
| H | 1.039714000  | 0.627851000  | 2.770809000  |

TS

|   |              |              |              |
|---|--------------|--------------|--------------|
| P | 1.691520000  | -0.877272000 | 0.458408000  |
| O | -0.742730000 | -1.448133000 | 3.209664000  |
| N | -1.347870000 | -0.656935000 | 1.055306000  |
| N | -0.029524000 | 1.683841000  | -0.118441000 |
| C | -1.087058000 | -1.092218000 | 2.169685000  |
| C | -2.581197000 | -0.795091000 | 0.346806000  |
| C | -3.779598000 | -1.001617000 | 1.023037000  |
| H | -3.796133000 | -1.074140000 | 2.104912000  |
| C | -4.959734000 | -1.099040000 | 0.298460000  |
| H | -5.893219000 | -1.260344000 | 0.824209000  |
| C | -4.947615000 | -0.983780000 | -1.087846000 |
| H | -5.872636000 | -1.056118000 | -1.646902000 |
| C | -3.744920000 | -0.776127000 | -1.752171000 |
| H | -3.724038000 | -0.687361000 | -2.831714000 |
| C | -2.558541000 | -0.681861000 | -1.036431000 |
| H | -1.622086000 | -0.522562000 | -1.554063000 |
| C | -0.800882000 | 2.613951000  | 0.758598000  |
| H | -0.588723000 | 3.603114000  | 0.352829000  |
| C | -2.313789000 | 2.411516000  | 0.713018000  |
| H | -2.676321000 | 2.231365000  | -0.298783000 |
| H | -2.791762000 | 3.317856000  | 1.091422000  |
| H | -2.627776000 | 1.583457000  | 1.347599000  |
| C | -0.266413000 | 2.574004000  | 2.185203000  |
| H | -0.402502000 | 1.587280000  | 2.637739000  |
| H | -0.817430000 | 3.291776000  | 2.795836000  |
| H | 0.792559000  | 2.832394000  | 2.223781000  |
| C | 0.406681000  | 2.206990000  | -1.460611000 |
| H | 0.951291000  | 1.382432000  | -1.930606000 |
| C | -0.803178000 | 2.523612000  | -2.333101000 |
| H | -1.477827000 | 1.669508000  | -2.410458000 |
| H | -0.457370000 | 2.781615000  | -3.335952000 |
| H | -1.362377000 | 3.377311000  | -1.943001000 |
| C | 1.353387000  | 3.396868000  | -1.345148000 |
| H | 0.852011000  | 4.288126000  | -0.962637000 |
| H | 1.728885000  | 3.636228000  | -2.342315000 |
| H | 2.210416000  | 3.178632000  | -0.707837000 |
| C | 1.496615000  | -2.162829000 | -0.934407000 |
| C | 0.294031000  | -3.049598000 | -0.580582000 |
| H | 0.411473000  | -3.515043000 | 0.400952000  |
| H | 0.219486000  | -3.846962000 | -1.326540000 |
| H | -0.648623000 | -2.503371000 | -0.596784000 |
| C | 2.752298000  | -3.046052000 | -0.949315000 |
| H | 3.635734000  | -2.507742000 | -1.294864000 |
| H | 2.580340000  | -3.871024000 | -1.647198000 |
| H | 2.961548000  | -3.477822000 | 0.032340000  |
| C | 1.292043000  | -1.538311000 | -2.319108000 |
| H | 0.354637000  | -0.979572000 | -2.376904000 |
| H | 1.242695000  | -2.334766000 | -3.068858000 |
| H | 2.107432000  | -0.869614000 | -2.598276000 |
| C | 3.358882000  | 0.026881000  | 0.452853000  |
| C | 4.391000000  | -0.911997000 | 1.103603000  |
| H | 4.060588000  | -1.245847000 | 2.090378000  |
| H | 5.328426000  | -0.361369000 | 1.230283000  |
| H | 4.606091000  | -1.790665000 | 0.496533000  |
| C | 3.191668000  | 1.239117000  | 1.381273000  |
| H | 2.522940000  | 1.992852000  | 0.966087000  |
| H | 4.169117000  | 1.708746000  | 1.525087000  |
| H | 2.812531000  | 0.947368000  | 2.364585000  |
| C | 3.856722000  | 0.478993000  | -0.921833000 |
| H | 4.057339000  | -0.364318000 | -1.584728000 |
| H | 4.797224000  | 1.025691000  | -0.797801000 |
| H | 3.149926000  | 1.145817000  | -1.418964000 |
| B | 0.422904000  | 0.448481000  | 0.161445000  |

TS1

|   |              |              |              |
|---|--------------|--------------|--------------|
| P | 1.282802000  | 0.368834000  | -0.076321000 |
| N | -0.792739000 | 2.088936000  | -0.099744000 |
| N | -1.816856000 | -0.207989000 | 0.063777000  |
| C | 0.185629000  | 2.729623000  | -0.259904000 |
| C | 1.786330000  | -0.738565000 | -1.517243000 |
| C | 0.830578000  | -0.372513000 | -2.665080000 |
| H | -0.200588000 | -0.662056000 | -2.450033000 |
| H | 1.141250000  | -0.895370000 | -3.574868000 |
| H | 0.847589000  | 0.700815000  | -2.879491000 |
| C | 1.747317000  | -2.249178000 | -1.269225000 |
| H | 2.443540000  | -2.553363000 | -0.485544000 |
| H | 2.045518000  | -2.764742000 | -2.188383000 |
| H | 0.749857000  | -2.606591000 | -1.007598000 |
| C | 3.211513000  | -0.327998000 | -1.929408000 |
| H | 3.275570000  | 0.743703000  | -2.134832000 |
| H | 3.485232000  | -0.864905000 | -2.843419000 |
| H | 3.951493000  | -0.575080000 | -1.166779000 |
| C | 1.907342000  | -0.226548000 | 1.598399000  |
| C | 1.256069000  | -1.513693000 | 2.115466000  |
| H | 0.190046000  | -1.371711000 | 2.300081000  |
| H | 1.718168000  | -1.784736000 | 3.070798000  |
| H | 1.384820000  | -2.357337000 | 1.436624000  |
| C | 3.430610000  | -0.400026000 | 1.534927000  |
| H | 3.717035000  | -1.271381000 | 0.942281000  |
| H | 3.813124000  | -0.552835000 | 2.549135000  |
| H | 3.925885000  | 0.481931000  | 1.119400000  |
| C | 1.571469000  | 0.916309000  | 2.572410000  |
| H | 2.066475000  | 1.848382000  | 2.288538000  |
| H | 1.912373000  | 0.645861000  | 3.576671000  |
| H | 0.493221000  | 1.098161000  | 2.632844000  |
| C | -1.710035000 | -1.677257000 | 0.194532000  |
| H | -0.643267000 | -1.884850000 | 0.265544000  |
| C | -2.249737000 | -2.403116000 | -1.035481000 |
| H | -3.326391000 | -2.259633000 | -1.156005000 |
| H | -2.069376000 | -3.475154000 | -0.928377000 |
| H | -1.753840000 | -2.064267000 | -1.946899000 |
| C | -2.362955000 | -2.173086000 | 1.483909000  |
| H | -2.006834000 | -1.609536000 | 2.348854000  |
| H | -2.113023000 | -3.225784000 | 1.632372000  |
| H | -3.452295000 | -2.094014000 | 1.449166000  |
| C | -3.203172000 | 0.331773000  | -0.016550000 |
| H | -3.859463000 | -0.536524000 | 0.045095000  |
| C | -3.535760000 | 1.229437000  | 1.172096000  |
| H | -3.333071000 | 0.713988000  | 2.113346000  |
| H | -4.596615000 | 1.489338000  | 1.144975000  |
| H | -2.960433000 | 2.157054000  | 1.149463000  |
| C | -3.467300000 | 0.996484000  | -1.365292000 |
| H | -2.894831000 | 1.919460000  | -1.479133000 |
| H | -4.527774000 | 1.245890000  | -1.447443000 |
| H | -3.208378000 | 0.321241000  | -2.184005000 |
| B | -0.696651000 | 0.576067000  | 0.007265000  |
| C | 1.031914000  | 3.876674000  | -0.482588000 |
| H | 0.395642000  | 4.764203000  | -0.547479000 |
| H | 1.582021000  | 3.736074000  | -1.414008000 |
| H | 1.736841000  | 3.974375000  | 0.343562000  |



## TS2

|   |              |              |              |   |              |              |              |
|---|--------------|--------------|--------------|---|--------------|--------------|--------------|
| P | -1.692638000 | 0.138989000  | 0.018646000  | H | -4.443492000 | 1.214562000  | -2.261363000 |
| N | 0.568785000  | -0.611920000 | -1.330661000 | H | -2.950817000 | 0.404204000  | -2.720862000 |
| N | 0.969119000  | 1.692579000  | -0.468465000 | C | 3.243222000  | -1.424387000 | -0.487171000 |
| N | 2.766815000  | -0.035963000 | -0.297211000 | H | 2.409600000  | -1.958228000 | -0.944709000 |
| C | -0.688601000 | -0.794328000 | -1.268132000 | C | 3.560582000  | -2.107832000 | 0.842357000  |
| C | 0.016126000  | 2.267505000  | -0.128378000 | H | 4.407719000  | -1.642115000 | 1.353518000  |
| C | -1.483117000 | -0.997970000 | 1.524999000  | H | 3.820192000  | -3.153221000 | 0.660206000  |
| C | -0.086661000 | -0.702788000 | 2.094966000  | H | 2.699010000  | -2.082868000 | 1.513442000  |
| H | 0.707663000  | -0.963966000 | 1.393174000  | C | 4.417684000  | -1.476216000 | -1.463002000 |
| H | 0.066312000  | -1.309214000 | 2.993420000  | H | 4.148958000  | -1.005789000 | -2.411591000 |
| H | 0.026278000  | 0.348233000  | 2.375013000  | H | 4.685123000  | -2.517436000 | -1.658300000 |
| C | -1.580279000 | -2.490997000 | 1.189600000  | H | 5.306531000  | -0.976465000 | -1.067944000 |
| H | -2.530757000 | -2.751815000 | 0.720672000  | C | 3.718732000  | 0.897102000  | 0.346564000  |
| H | -1.497063000 | -3.069581000 | 2.115545000  | H | 4.639530000  | 0.328916000  | 0.484251000  |
| H | -0.767486000 | -2.809256000 | 0.532001000  | C | 4.068346000  | 2.081813000  | -0.552259000 |
| C | -2.524002000 | -0.636778000 | 2.592323000  | H | 4.409210000  | 1.731995000  | -1.529166000 |
| H | -2.529590000 | 0.433112000  | 2.816731000  | H | 4.872330000  | 2.663614000  | -0.094655000 |
| H | -2.272123000 | -1.168713000 | 3.514990000  | H | 3.214992000  | 2.746821000  | -0.700574000 |
| H | -3.531612000 | -0.942313000 | 2.306237000  | C | 3.255471000  | 1.322999000  | 1.739544000  |
| C | -3.478606000 | 0.282929000  | -0.572484000 | H | 2.379566000  | 1.973903000  | 1.696456000  |
| C | -4.277299000 | -1.020833000 | -0.674356000 | H | 4.054433000  | 1.874941000  | 2.240731000  |
| H | -3.836285000 | -1.735308000 | -1.368900000 | H | 3.007067000  | 0.450134000  | 2.347093000  |
| H | -5.285719000 | -0.790627000 | -1.034002000 | B | 1.480452000  | 0.286619000  | -0.690807000 |
| H | -4.382399000 | -1.506514000 | 0.297667000  | C | -1.306998000 | -1.787576000 | -2.214353000 |
| C | -4.204247000 | 1.239614000  | 0.394950000  | H | -1.737565000 | -2.618498000 | -1.649295000 |
| H | -4.370031000 | 0.801831000  | 1.378023000  | H | -0.535298000 | -2.169685000 | -2.882624000 |
| H | -5.185121000 | 1.479661000  | -0.027102000 | H | -2.111900000 | -1.351942000 | -2.805714000 |
| H | -3.661854000 | 2.179495000  | 0.524906000  | C | -0.806369000 | 3.378634000  | 0.301363000  |
| C | -3.421733000 | 0.996316000  | -1.936627000 | H | -1.651437000 | 3.497589000  | -0.376118000 |
| H | -2.888346000 | 1.948792000  | -1.869471000 | H | -0.188411000 | 4.279822000  | 0.301153000  |
|   |              |              |              | H | -1.176439000 | 3.171885000  | 1.306446000  |

**IP1**

|   |              |              |              |
|---|--------------|--------------|--------------|
| P | 1.276454000  | 0.758147000  | -0.340879000 |
| N | -1.367905000 | 1.644381000  | -0.418294000 |
| N | -1.444740000 | -0.748510000 | 0.135925000  |
| C | -1.716958000 | 2.713462000  | -0.631096000 |
| C | 2.106575000  | -0.569860000 | -1.414374000 |
| C | 1.142744000  | -0.819578000 | -2.584756000 |
| H | 0.214941000  | -1.295727000 | -2.263146000 |
| H | 1.620800000  | -1.477633000 | -3.317628000 |
| H | 0.885042000  | 0.113897000  | -3.094778000 |
| C | 2.512595000  | -1.898522000 | -0.770449000 |
| H | 3.203076000  | -1.753932000 | 0.062805000  |
| H | 3.031196000  | -2.509034000 | -1.517999000 |
| H | 1.661838000  | -2.481581000 | -0.419013000 |
| C | 3.374869000  | 0.092902000  | -1.987904000 |
| H | 3.140522000  | 1.033937000  | -2.491345000 |
| H | 3.832255000  | -0.581437000 | -2.720038000 |
| H | 4.119353000  | 0.296506000  | -1.216032000 |
| C | 1.946764000  | 0.815738000  | 1.431429000  |
| C | 1.671636000  | -0.403506000 | 2.315408000  |
| H | 0.602375000  | -0.527919000 | 2.492783000  |
| H | 2.148362000  | -0.256908000 | 3.291195000  |
| H | 2.065487000  | -1.329427000 | 1.893903000  |
| C | 3.459316000  | 1.068375000  | 1.364873000  |
| H | 4.002685000  | 0.189774000  | 1.009836000  |
| H | 3.829491000  | 1.298400000  | 2.369576000  |
| H | 3.702631000  | 1.912142000  | 0.713495000  |
| C | 1.267628000  | 2.040203000  | 2.069364000  |
| H | 1.477059000  | 2.955623000  | 1.510307000  |
| H | 1.640755000  | 2.171518000  | 3.090517000  |
| H | 0.181336000  | 1.915087000  | 2.135322000  |
| C | -0.857655000 | -2.033818000 | 0.581526000  |
| H | 0.210292000  | -1.848078000 | 0.654555000  |
| C | -1.082958000 | -3.162224000 | -0.422879000 |
| H | -2.138337000 | -3.431933000 | -0.509970000 |
| H | -0.545141000 | -4.051040000 | -0.084629000 |
| H | -0.712641000 | -2.901335000 | -1.414856000 |
| C | -1.353181000 | -2.422329000 | 1.975225000  |
| H | -1.252429000 | -1.595437000 | 2.680540000  |
| H | -0.755974000 | -3.259565000 | 2.342691000  |
| H | -2.398406000 | -2.741389000 | 1.968479000  |
| C | -2.932659000 | -0.766457000 | 0.028843000  |
| H | -3.219924000 | -1.792788000 | 0.253113000  |
| C | -3.614156000 | 0.104467000  | 1.082518000  |
| H | -3.232831000 | -0.127387000 | 2.078725000  |
| H | -4.687430000 | -0.098887000 | 1.072470000  |
| H | -3.480026000 | 1.171247000  | 0.901415000  |
| C | -3.408183000 | -0.496697000 | -1.396767000 |
| H | -3.235627000 | 0.533458000  | -1.711534000 |
| H | -4.482161000 | -0.686042000 | -1.459395000 |
| H | -2.901269000 | -1.161237000 | -2.099592000 |
| B | -0.637354000 | 0.335819000  | -0.133296000 |
| C | -2.172738000 | 4.048602000  | -0.898935000 |
| H | -2.767099000 | 4.040292000  | -1.814404000 |
| H | -1.307226000 | 4.701921000  | -1.020768000 |
| H | -2.786334000 | 4.387968000  | -0.062508000 |

**IP2**

|   |              |              |              |
|---|--------------|--------------|--------------|
| P | -1.107257000 | -0.131644000 | -0.022978000 |
| N | 0.443780000  | -2.027279000 | -0.266994000 |
| N | 1.984891000  | 0.069841000  | 0.013577000  |
| C | -0.841657000 | -1.958756000 | -0.256204000 |
| C | -1.829121000 | 0.701108000  | -1.525362000 |
| C | -1.292395000 | -0.069403000 | -2.743150000 |
| H | -0.198910000 | -0.092796000 | -2.767593000 |
| H | -1.630913000 | 0.443586000  | -3.647040000 |
| H | -1.665392000 | -1.095142000 | -2.784884000 |
| C | -1.318436000 | 2.149863000  | -1.585234000 |
| H | -1.621856000 | 2.744119000  | -0.723002000 |
| H | -1.741288000 | 2.621502000  | -2.476549000 |
| H | -0.231169000 | 2.191783000  | -1.676507000 |
| C | -3.361128000 | 0.667352000  | -1.506722000 |
| H | -3.753137000 | -0.346550000 | -1.396306000 |
| H | -3.725518000 | 1.062091000  | -2.459109000 |
| H | -3.773072000 | 1.293663000  | -0.713567000 |
| C | -1.841189000 | 0.262601000  | 1.643612000  |
| C | -1.901363000 | 1.783643000  | 1.837176000  |
| H | -0.928428000 | 2.260389000  | 1.690582000  |
| H | -2.215190000 | 1.985551000  | 2.864861000  |
| H | -2.629956000 | 2.252823000  | 1.173613000  |
| C | -3.239837000 | -0.354624000 | 1.788686000  |
| H | -3.961073000 | 0.071452000  | 1.091849000  |
| H | -3.597068000 | -0.149906000 | 2.801802000  |
| H | -3.228584000 | -1.438407000 | 1.657946000  |
| C | -0.890710000 | -0.359888000 | 2.680858000  |
| H | -0.806987000 | -1.444210000 | 2.571496000  |
| H | -1.291767000 | -0.159428000 | 3.677690000  |
| H | 0.112450000  | 0.070848000  | 2.631163000  |
| C | 2.023624000  | 1.536387000  | 0.185400000  |
| H | 0.979548000  | 1.857998000  | 0.223195000  |
| C | 2.670249000  | 2.216830000  | -1.018464000 |
| H | 3.731820000  | 1.970670000  | -1.103509000 |
| H | 2.587806000  | 3.301130000  | -0.916878000 |
| H | 2.173823000  | 1.915161000  | -1.944405000 |
| C | 2.670030000  | 1.934403000  | 1.509708000  |
| H | 2.160571000  | 1.456522000  | 2.349702000  |
| H | 2.602362000  | 3.017026000  | 1.637376000  |
| H | 3.727705000  | 1.661634000  | 1.547131000  |
| C | 3.288803000  | -0.638676000 | -0.059116000 |
| H | 4.058250000  | 0.128389000  | 0.041788000  |
| C | 3.446784000  | -1.612639000 | 1.105481000  |
| H | 3.311072000  | -1.098459000 | 2.059790000  |
| H | 4.447821000  | -2.050106000 | 1.088826000  |
| H | 2.717645000  | -2.423355000 | 1.037037000  |
| C | 3.474704000  | -1.308724000 | -1.417781000 |
| H | 2.743440000  | -2.107571000 | -1.561137000 |
| H | 4.474838000  | -1.743983000 | -1.481771000 |
| H | 3.363336000  | -0.581276000 | -2.225128000 |
| B | 0.798624000  | -0.599136000 | -0.082881000 |
| C | -1.797791000 | -3.083882000 | -0.389149000 |
| H | -2.294738000 | -3.259191000 | 0.569770000  |
| H | -1.268392000 | -3.989365000 | -0.686245000 |
| H | -2.577399000 | -2.847769000 | -1.117425000 |

### IP3

|   |              |              |              |   |              |              |              |
|---|--------------|--------------|--------------|---|--------------|--------------|--------------|
| P | 1.598533000  | 0.000330000  | 0.285241000  | H | 2.140044000  | -2.763661000 | -0.221764000 |
| N | -0.458050000 | 0.073264000  | -1.490241000 | H | 3.791327000  | -2.803863000 | -0.842074000 |
| N | -1.238792000 | -1.860107000 | -0.189804000 | H | 2.528664000  | -1.999804000 | -1.770819000 |
| N | -2.574526000 | 0.250922000  | -0.122136000 | C | -2.820732000 | 1.631001000  | -0.599216000 |
| C | 0.804270000  | 0.201779000  | -1.416528000 | H | -1.910075000 | 1.931945000  | -1.120057000 |
| C | -0.981599000 | -2.953118000 | 0.021752000  | C | -3.052195000 | 2.615957000  | 0.547142000  |
| C | 1.864160000  | 1.817312000  | 0.775800000  | H | -4.027837000 | 2.476898000  | 1.019664000  |
| C | 0.468915000  | 2.322794000  | 1.172201000  | H | -3.023236000 | 3.635199000  | 0.155129000  |
| H | -0.210523000 | 2.320231000  | 0.317405000  | H | -2.281883000 | 2.521821000  | 1.313814000  |
| H | 0.542217000  | 3.355548000  | 1.529179000  | C | -3.963451000 | 1.659204000  | -1.613235000 |
| H | 0.025812000  | 1.716367000  | 1.966732000  | H | -3.752873000 | 0.989594000  | -2.450193000 |
| C | 2.424733000  | 2.752631000  | -0.301796000 | H | -4.088289000 | 2.672458000  | -2.002551000 |
| H | 3.375595000  | 2.408415000  | -0.710218000 | H | -4.911852000 | 1.359438000  | -1.157968000 |
| H | 2.593883000  | 3.740040000  | 0.141431000  | C | -3.634119000 | -0.338348000 | 0.727582000  |
| H | 1.718954000  | 2.887078000  | -1.124696000 | H | -4.384914000 | 0.444197000  | 0.839366000  |
| C | 2.771988000  | 1.859435000  | 2.012687000  | C | -4.348601000 | -1.516507000 | 0.064649000  |
| H | 2.447702000  | 1.156048000  | 2.784941000  | H | -4.674893000 | -1.249287000 | -0.942546000 |
| H | 2.737625000  | 2.866064000  | 2.442061000  | H | -5.230731000 | -1.782320000 | 0.652149000  |
| H | 3.813167000  | 1.647013000  | 1.762075000  | H | -3.720547000 | -2.406389000 | -0.002295000 |
| C | 3.245748000  | -0.890193000 | 0.003086000  | C | -3.125068000 | -0.655814000 | 2.132703000  |
| C | 4.359008000  | -0.131842000 | -0.725278000 | H | -2.382580000 | -1.457159000 | 2.130720000  |
| H | 4.067177000  | 0.191228000  | -1.724992000 | H | -3.957258000 | -0.974653000 | 2.765002000  |
| H | 5.228491000  | -0.789689000 | -0.833331000 | H | -2.669077000 | 0.229144000  | 2.581557000  |
| H | 4.684602000  | 0.744421000  | -0.161352000 | B | -1.428757000 | -0.395549000 | -0.556821000 |
| C | 3.759596000  | -1.320050000 | 1.391247000  | C | 1.569136000  | 0.500560000  | -2.677668000 |
| H | 4.098470000  | -0.476596000 | 1.992810000  | H | 2.290698000  | 1.304208000  | -2.536865000 |
| H | 4.612503000  | -1.994239000 | 1.259495000  | H | 0.871444000  | 0.763251000  | -3.473304000 |
| H | 2.991753000  | -1.856162000 | 1.955934000  | H | 2.132045000  | -0.382999000 | -2.989536000 |
| C | 2.894762000  | -2.181377000 | -0.759087000 | C | -0.672347000 | -4.325316000 | 0.313302000  |
|   |              |              |              | H | -0.157415000 | -4.763720000 | -0.543134000 |
|   |              |              |              | H | -1.600501000 | -4.865052000 | 0.509333000  |
|   |              |              |              | H | -0.027575000 | -4.359412000 | 1.193590000  |

## References

- 1 N. Szyrkiewicz, A. Ordyszewska, J. Chojnacki and R. Grubba, *RSC Adv.*, 2019, **9**, 27749–27753.
- 2 I. Krossing, *Chem. - A Eur. J.*, 2001, **7**, 490–502.
- 3 O. V Dolomanov, L. J. Bourhis, R. J. Gildea, J. A. K. Howard and H. Puschmann, *J. Appl. Crystallogr.*, 2009, **42**, 339–341.
- 4 G. M. Sheldrick, *Acta Cryst. A*, 2015, **71**, 3–8.
- 5 G. M. Sheldrick, *Acta Cryst. C*, 2015, **71**, 3–8.
- 6 J. Da Chai and M. Head-Gordon, *Phys. Chem. Chem. Phys.*, 2008, **10**, 6615–6620.
- 7 R. Krishnan, J. S. Binkley, R. Seeger and J. A. Pople, *J. Chem. Physicsjournal Chem. Phys.*, 1980, **72**, 650–654.
- 8 S. Miertuš, E. Scrocco and J. Tomasi, *Chem. Phys.*, 1981, **55**, 117–129.
- 9 E. D. Glendening, J. K. Badenhop, A. E. Reed, J. E. Carpenter, J. A. Bohmann, C. M. Morales, P. Karafiloglou, C. R. Landis and F. Weinhold, *NBO 7.0.*, Theoretical Chemistry Institute, University of Wisconsin, Madison, 2018.
- 10 M. J. Frisch, G. W. Trucks, H. B. Schlegel, G. E. Scuseria, M. A. Robb, J. R. Cheeseman, G. Scalmani, V. Barone, B. Mennucci, G. A. Petersson, H. Nakatsuji, M. Caricato, X. Li, H. P. Hratchian, A. F. Izmaylov, J. Bloino, G. Zheng, J. L. Sonnenberg, M. Hada, M. Ehara, K. Toyota, R. Fukuda, J. Hasegawa, M. Ishida, T. Nakajima, Y. Honda, O. Kitao, H. Nakai, T. Vreven, J. A. Montgomery, Jr., J. E. Peralta, F. Ogliaro, M. Bearpark, J. J. Heyd, E. Brothers, K. N. Kudin, V. N. Staroverov, R. Kobayashi, J. Normand, K. Raghavachari, A. Rendell, J. C. Burant, S. S. Iyengar, J. Tomasi, M. Cossi, N. Rega, J. M. Millam, M. Klene, J. E. Knox, J. B. Cro, J. Cioslowski and D. J. Fox, *Gaussian16*, Gaussian, Inc., Wallingford CT, 2016.
- 11 M. J. Frisch, G. W. Trucks, H. B. Schlegel, G. E. Scuseria, M. A. Robb, J. R. Cheeseman, G. Scalmani, V. Barone, G. A. Petersson, H. Nakatsuji, X. Li, M. Caricato, A. Marenich, J. Bloino, B. G. Janesko, R. Gomperts, B. Mennucci, H. P. Hratchian, J. V. Ortiz, A. F. Izmaylov, J. L. Sonnenberg, D. Williams-Young, F. Ding, F. Lipparini, F. Egidi, J. Goings, B. Peng, A. Petrone, T. Henderson, D. Ranasinghe, V. G. Zakrzewski, J. Gao, N. Rega, G. Zheng, W. Liang, M. Hada, M. Ehara, K. Toyota, R. Fukuda, J. Hasegawa, M. Ishida, T. Nakajima, Y. Honda, O. Kitao, H. Nakai,

T. Vreven, K. Throssell, J. A. Montgomery, Jr., J. E. Peralta, F. Ogliaro, M. Bearpark, J. J. Heyd, E. Brothers, K. N. Kudin, V. N. Staroverov, T. Keith, R. Kobayashi, J. Normand, K. Raghavachari, A. Rendell, J. C. Burant, S. S. Iyengar, J. Tomasi, M. Cossi, J. M. Millam, M. Klene, C. Adamo, R. Cammi, J. W. Ochterski, R. L. Martin, K. Morokuma, O. Farkas, J. B. Foresman and D. J. Fox, *Gaussian 09, Revision D.01*, Gaussian, Inc., Wallingford CT, 2009.
